# Supplementary material for: Squaramide-Tethered Sulfonamides and Coumarins: Synthesis, Inhibition of Tumor-Associated CAs IX and XII and Docking Simulations
Source: MDPI journal article supplement (doi:10.3390/ijms23147685), 2022-07-12
Supplement: s1 [file s1]

# Squaramide-Tethered Sulfonamides and Coumarins: Synthesis, Inhibition of Tumor-Associated CAs IX and XII and Docking Simulations

Giulia Arrighi <sup>1</sup>, Adrián Puerta <sup>2</sup>, Andrea Petrini <sup>3</sup>, Francisco J. Hicke <sup>1</sup>, Alessio Nocentini <sup>3</sup>,  
Miguel X. Fernandes <sup>2</sup>, José M. Padrón <sup>2</sup>, Claudiu T. Supuran <sup>3,\*</sup>, José G. Fernández-Bolaños <sup>1</sup>  
and Óscar López <sup>1,\*</sup>

<sup>1</sup> Departamento de Química Orgánica, Facultad de Química, Universidad de Sevilla, Apartado 1203,  
E-41071 Seville, Spain; giulia.arrighi1@stud.unifi.it (G.A.); javipoke@hotmail.es (F.J.H.);  
bolanos@us.es (J.G.F.-B.)

<sup>2</sup> BioLab, Instituto Universitario de Bio-Organica Antonio González (IUBO-AG), Universidad de La Laguna,  
c/Astrofísico Francisco Sánchez 2, E-38206 La Laguna, Spain; apuertaa@ull.es (A.P.);  
mfernand@ull.es (M.X.F.); jmpadron@ull.es (J.M.P.)

<sup>3</sup> NEUROFARBA Department, Sezione di Scienze Farmaceutiche e Nutraceutiche, University of Florence,  
50019 Florence, Italy; andrea.petreni@unifi.it (A.P.); alessio.nocentini@unifi.it (A.N.)

\* Correspondence: claudiu.supuran@unifi.it (C.T.S.); osc-lopez@us.es (Ó.L.)

<sup>1</sup>H- and <sup>13</sup>C-NMR spectra of compounds 5, 6, 8, 10, 11, 16.....S2–S53

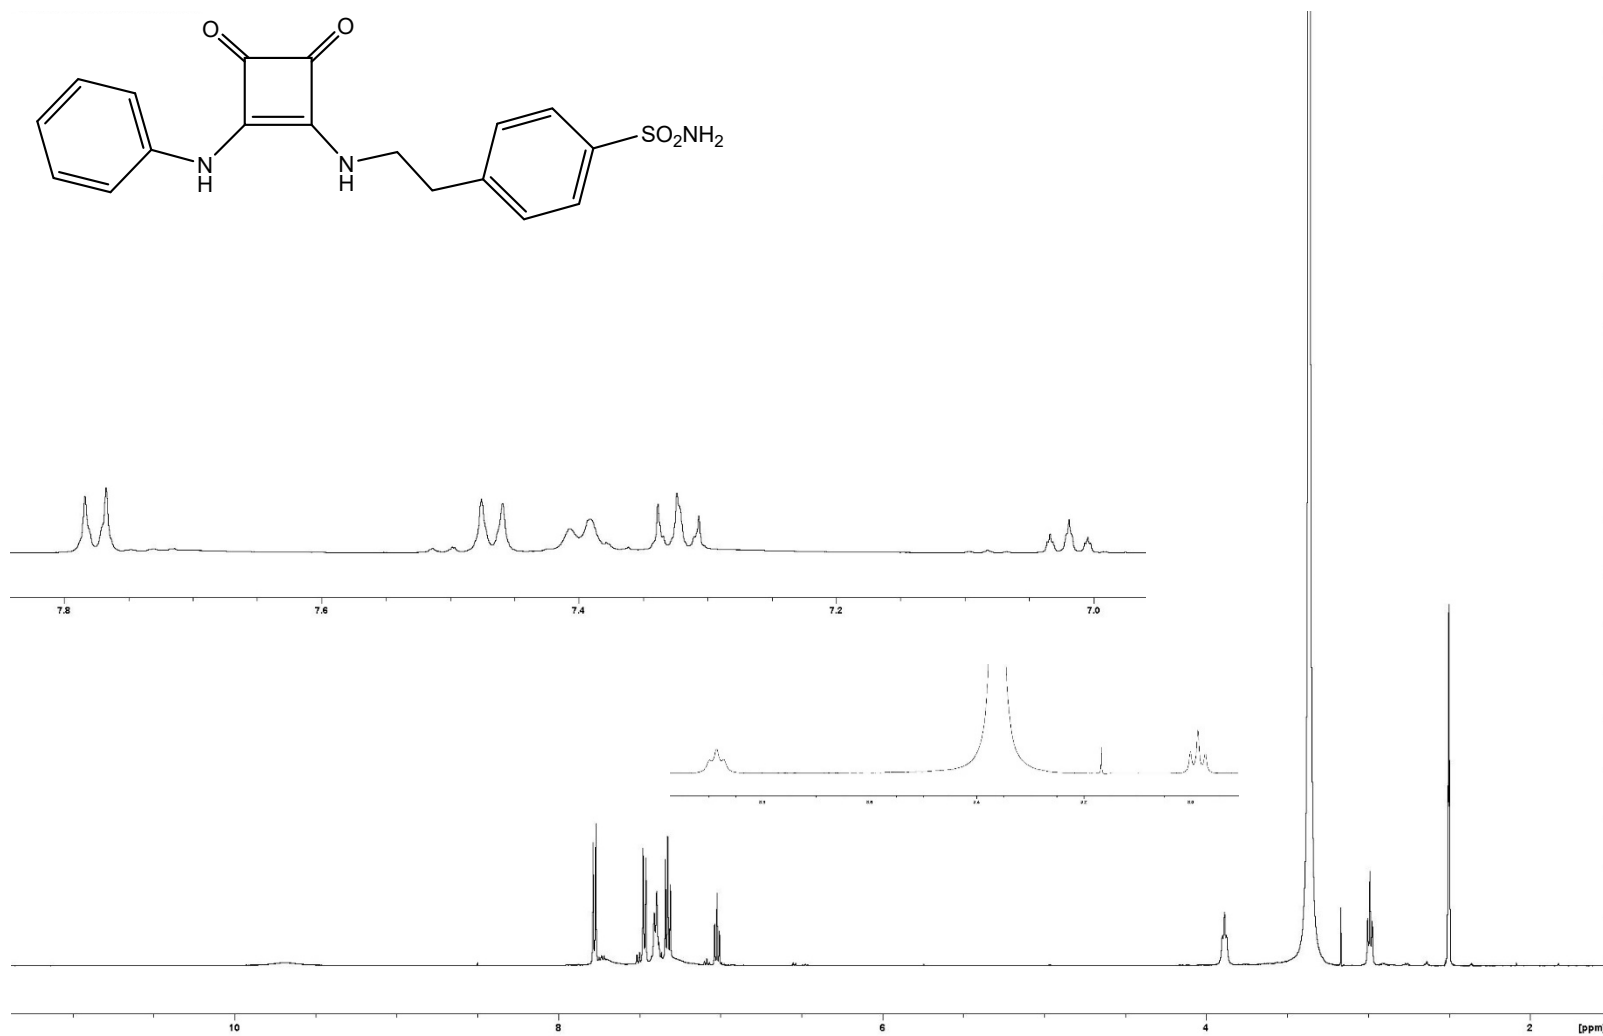

<sup>1</sup>H-NMR (500 MHz, (CD<sub>3</sub>)<sub>2</sub>SO) of **5a**

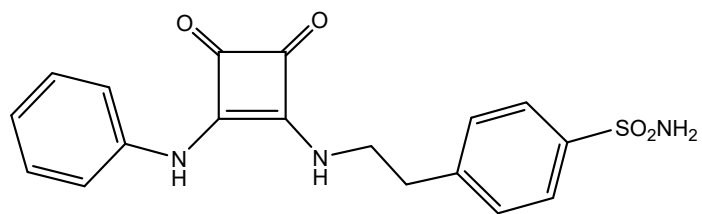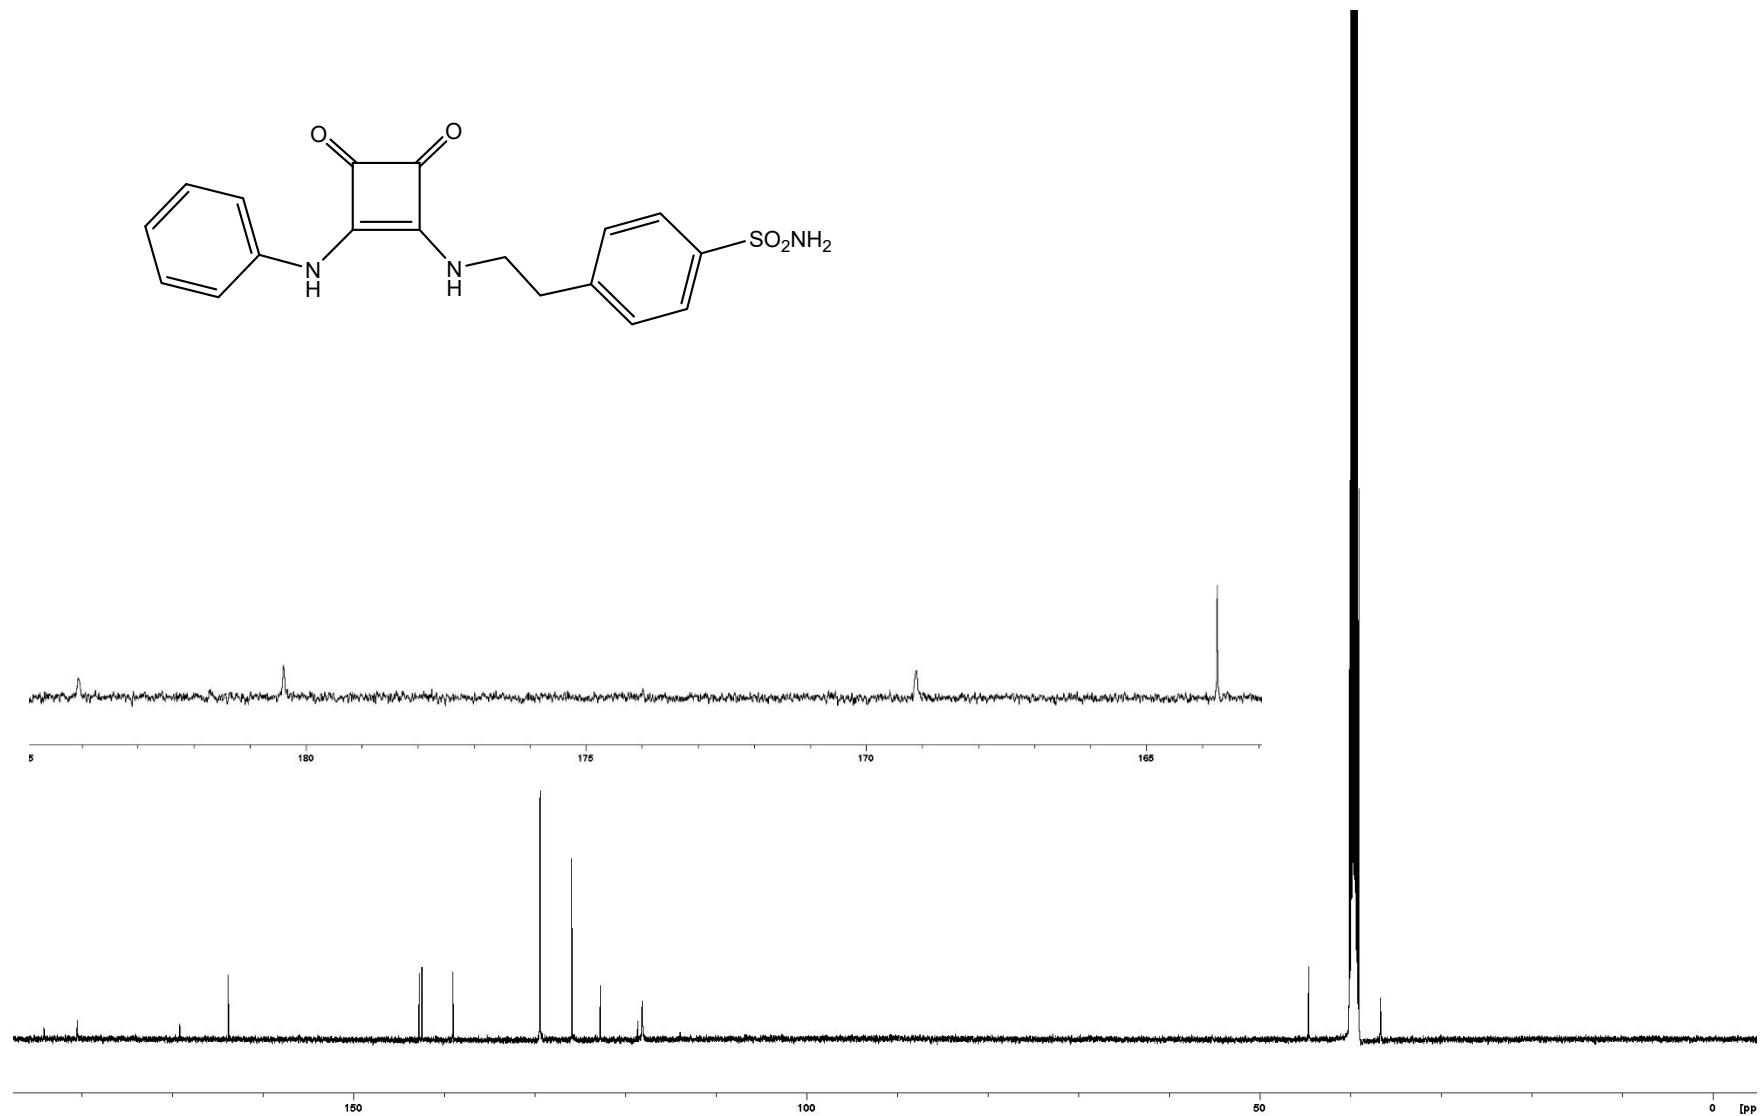

<sup>13</sup>C-NMR (125.7 MHz, (CD<sub>3</sub>)<sub>2</sub>SO) of **5a**

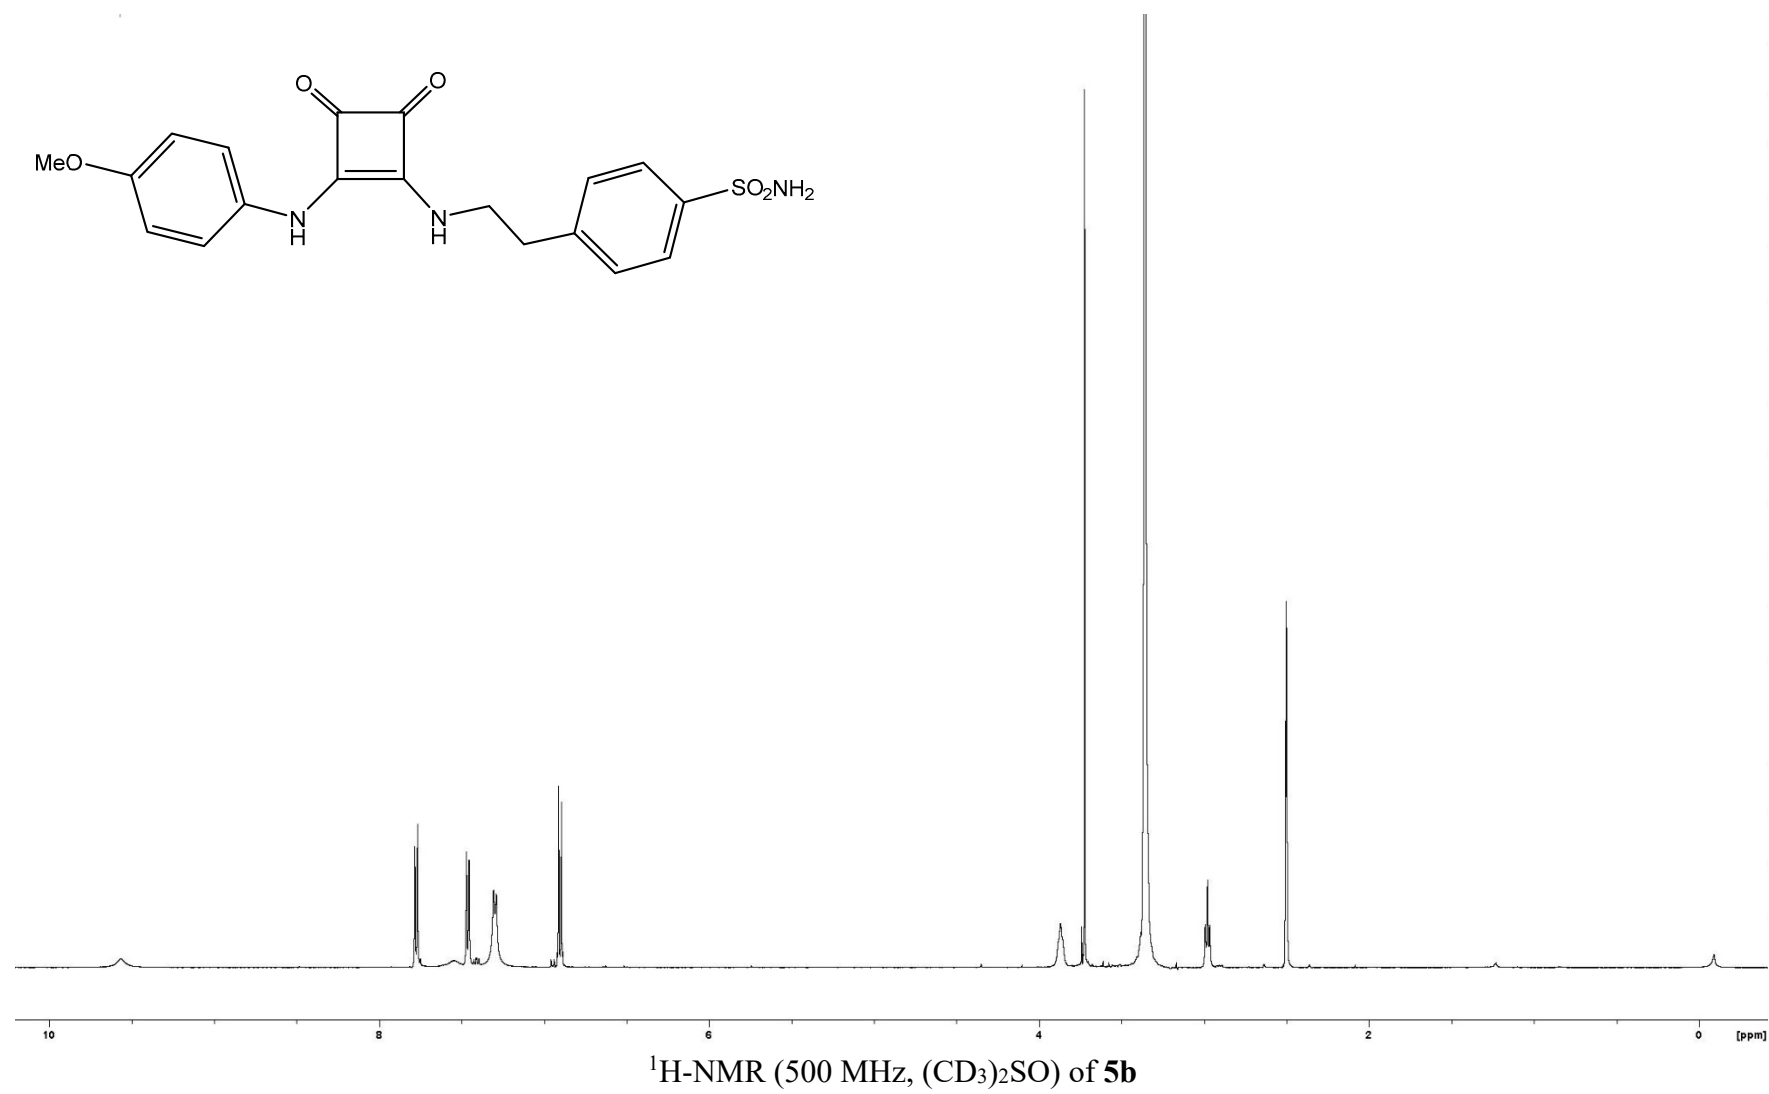

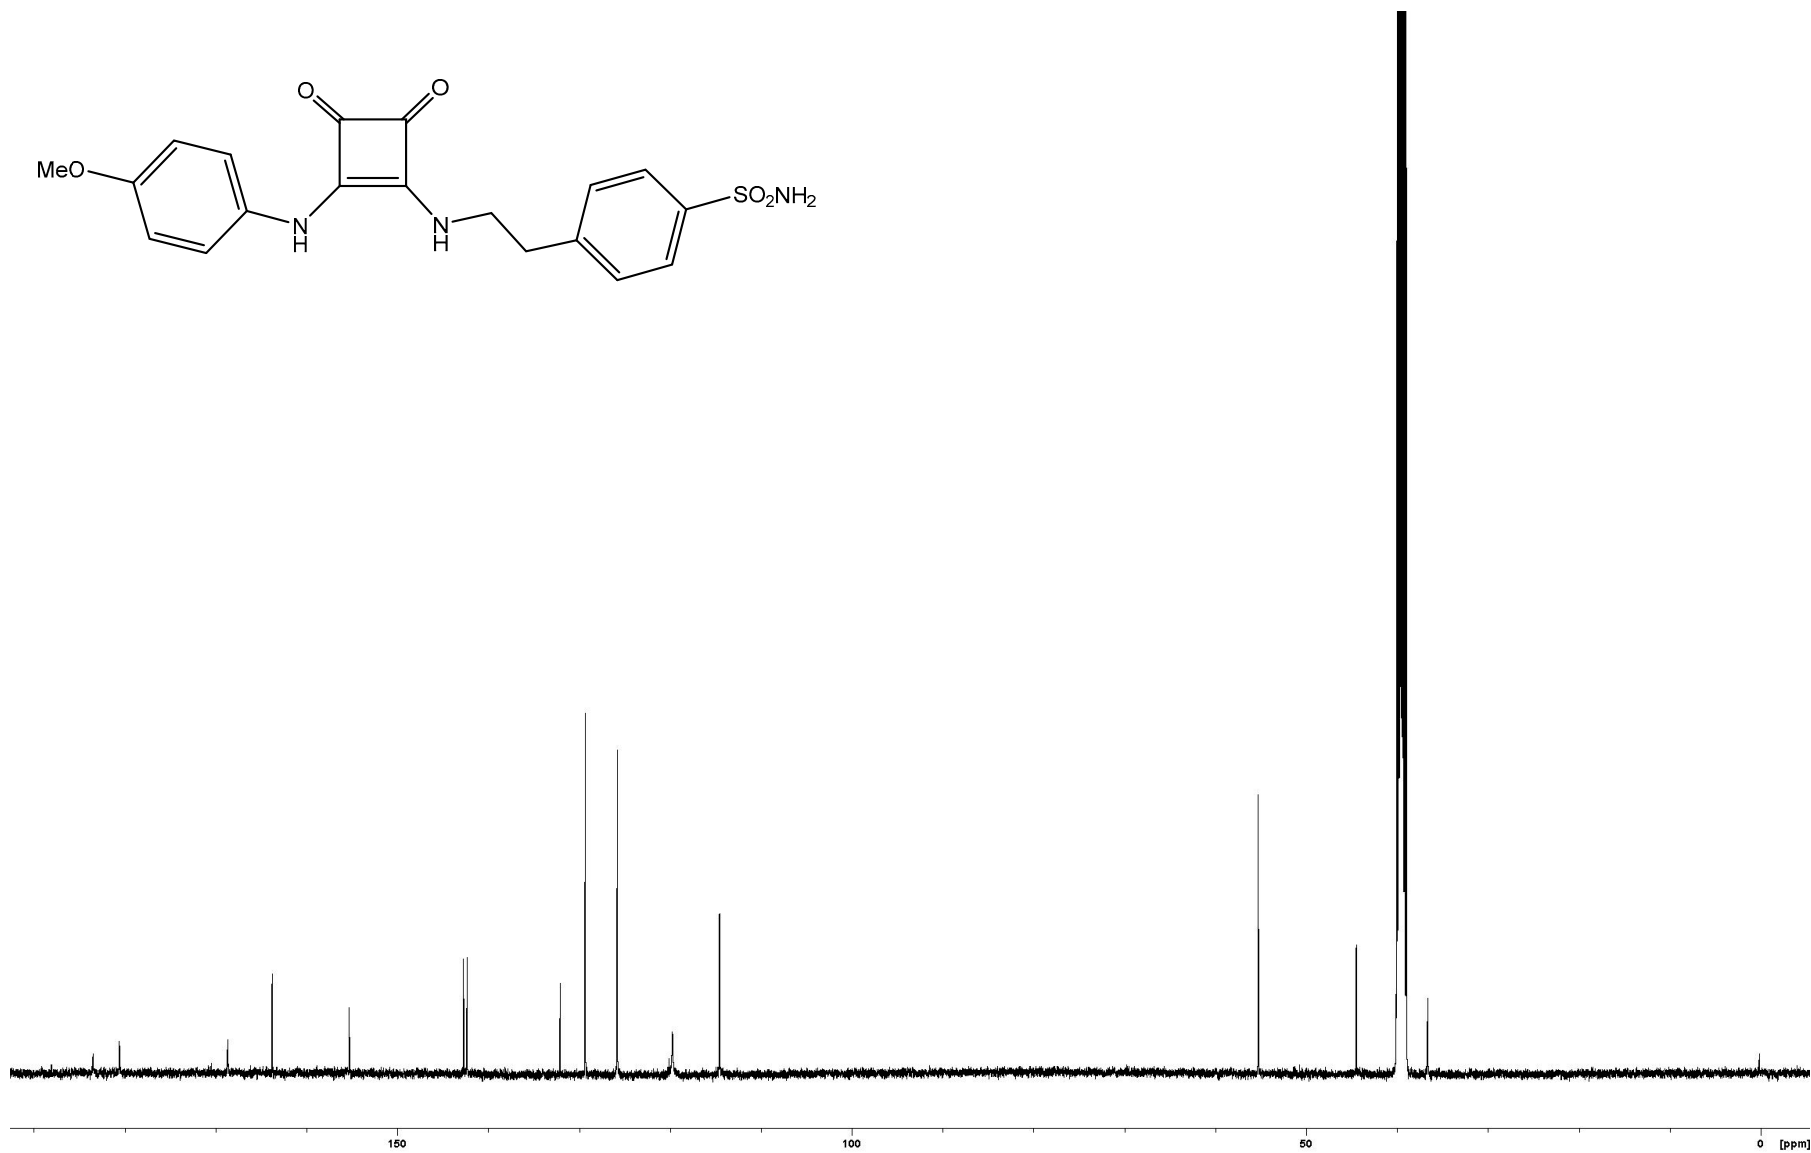

<sup>13</sup>C-NMR (125.7 MHz, (CD<sub>3</sub>)<sub>2</sub>SO) of **5b**

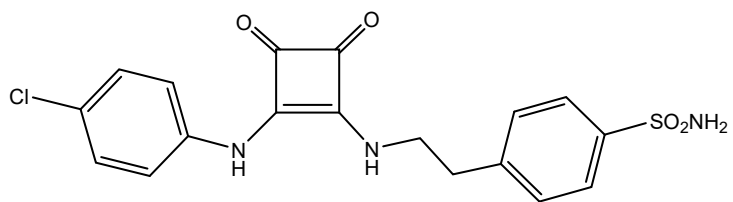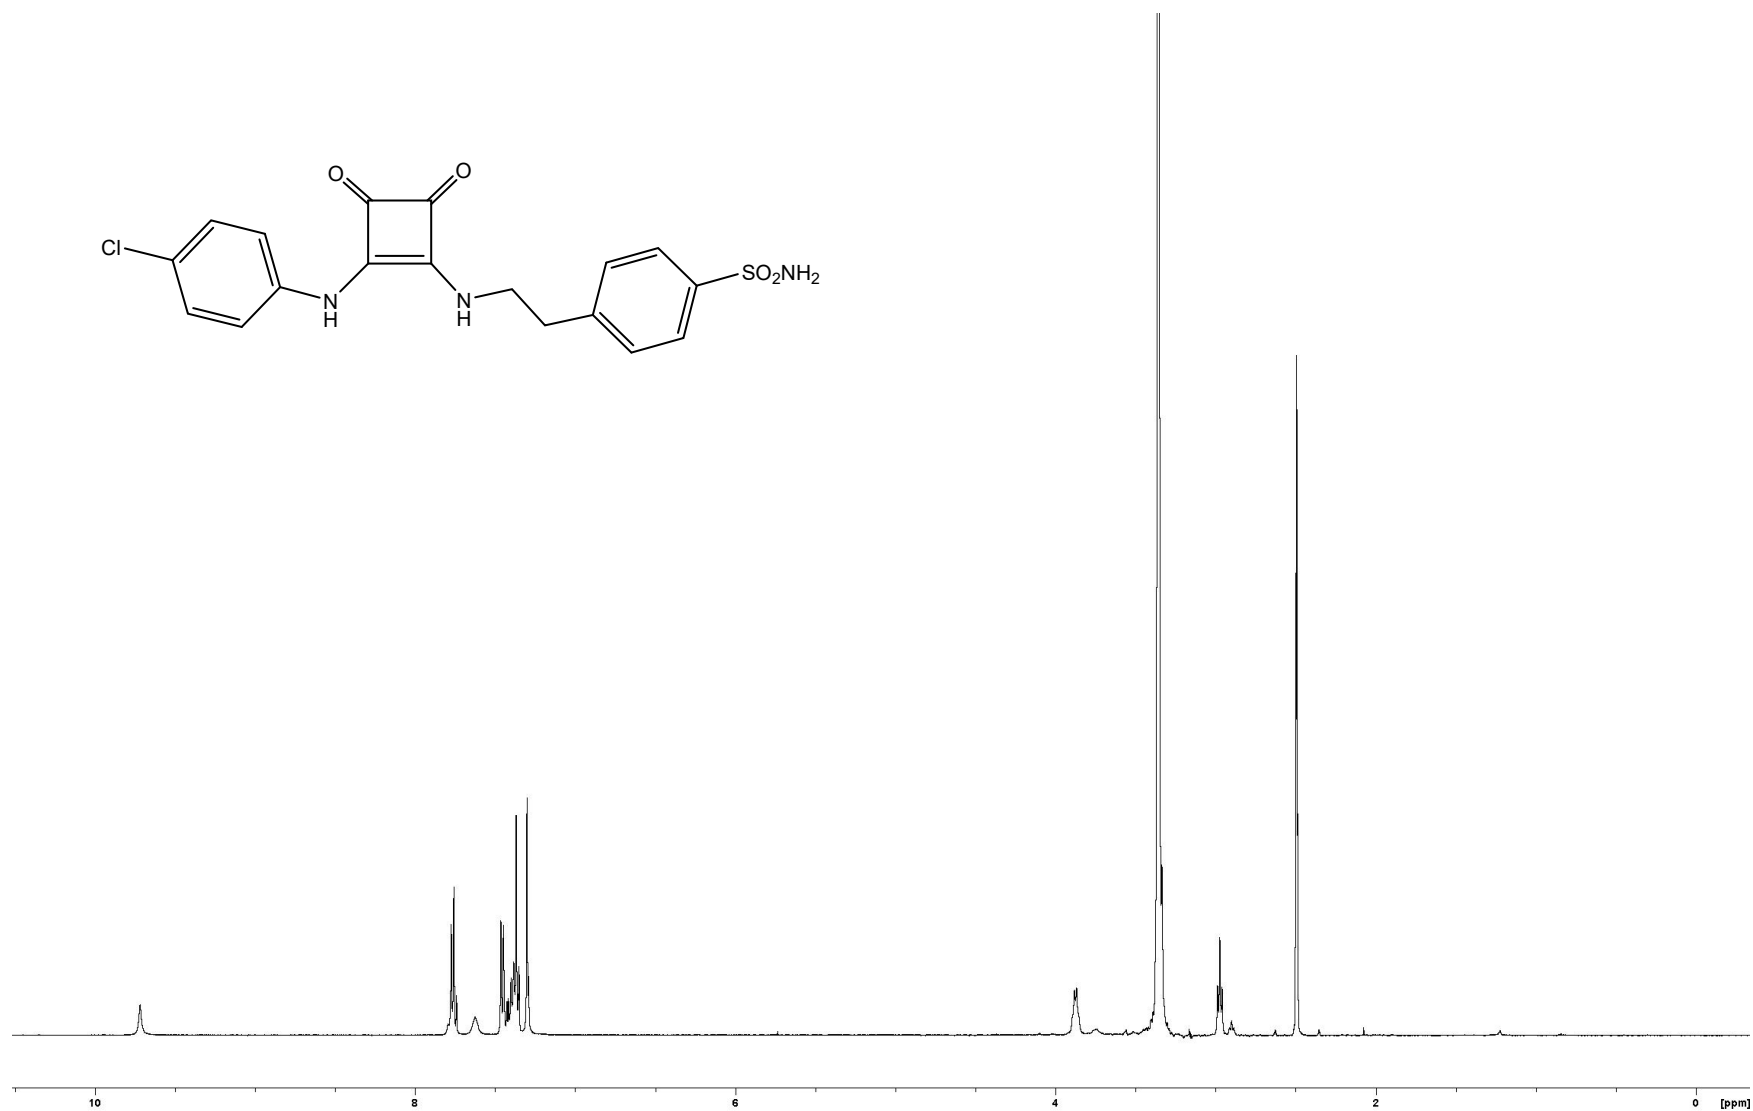

$^1\text{H}$ -NMR (500 MHz,  $(\text{CD}_3)_2\text{SO}$ ) of **5c**

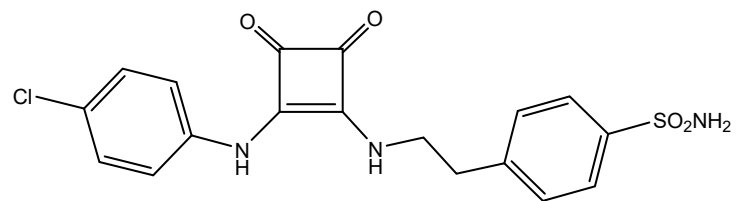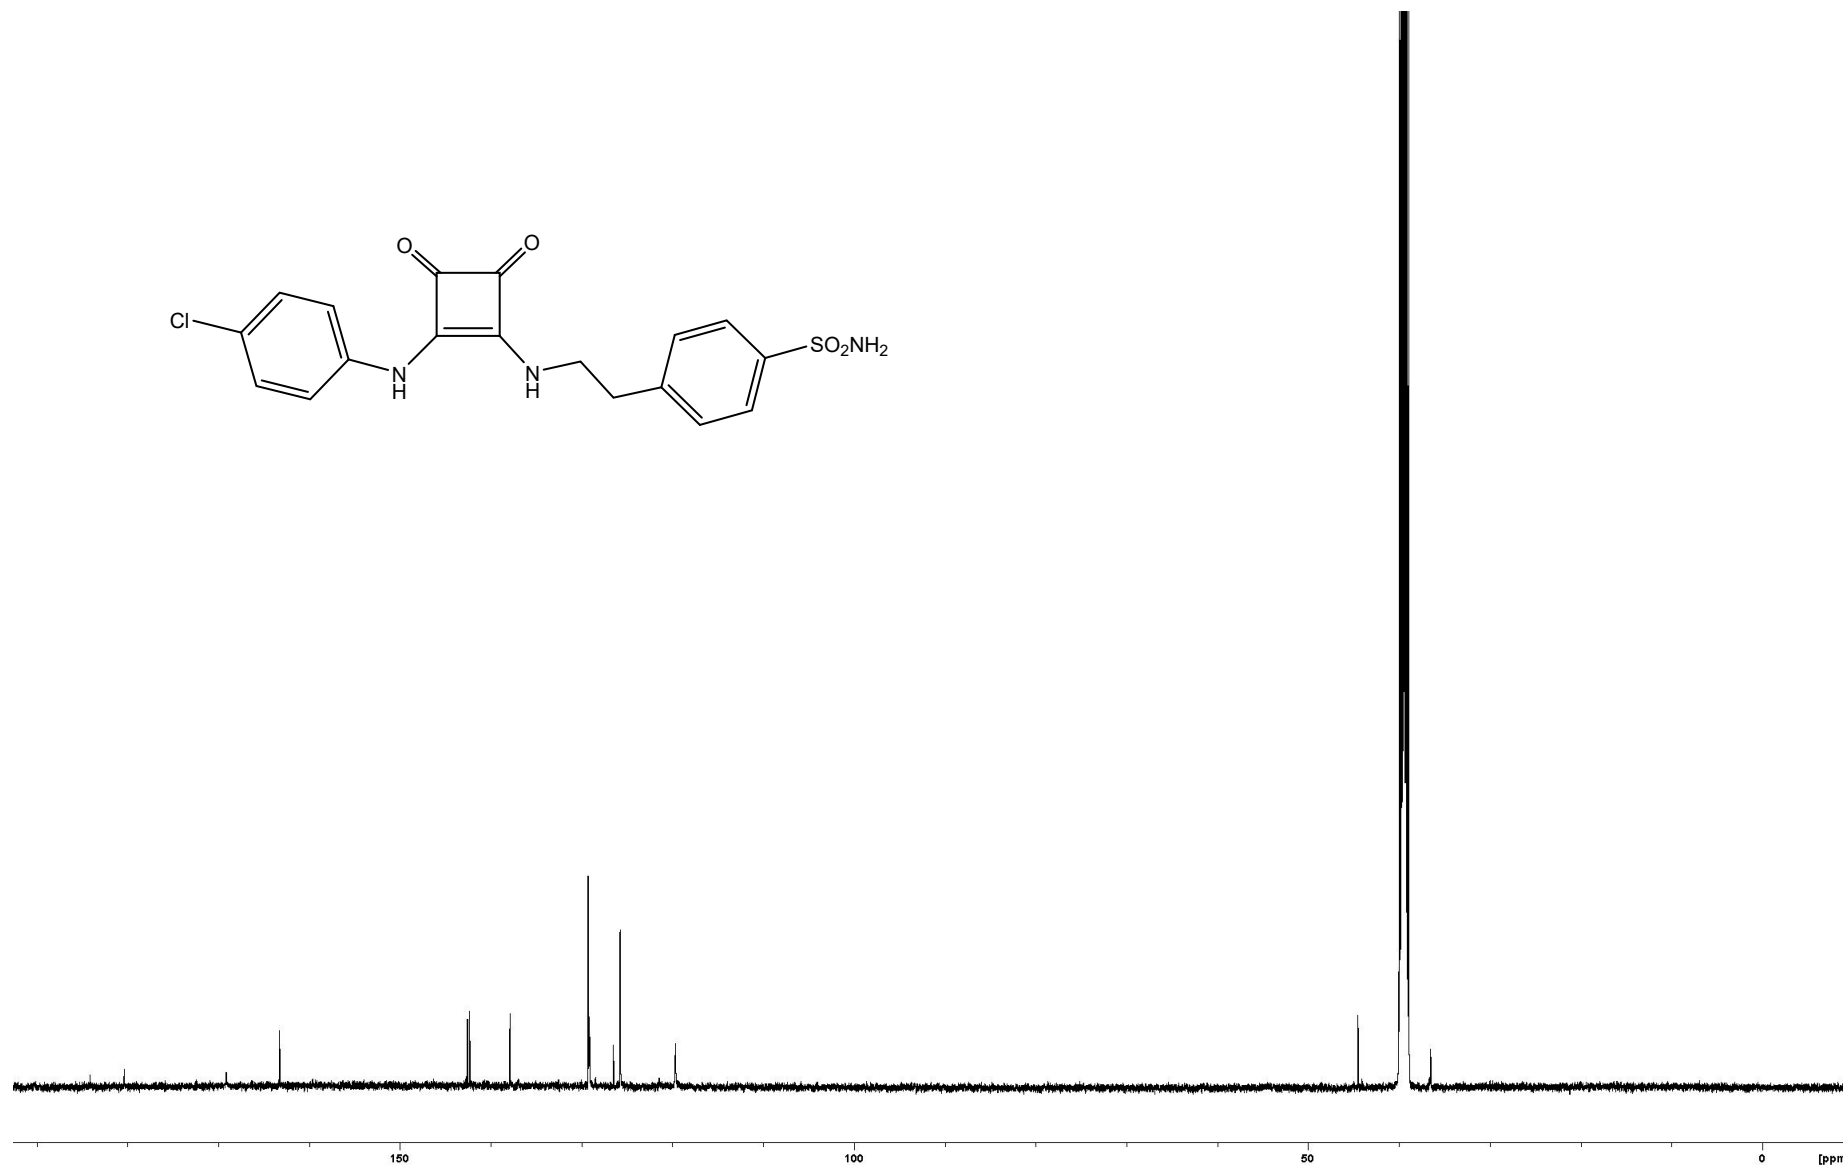

$^{13}\text{C}$ -NMR (125.7 MHz,  $(\text{CD}_3)_2\text{SO}$ ) of **5c**

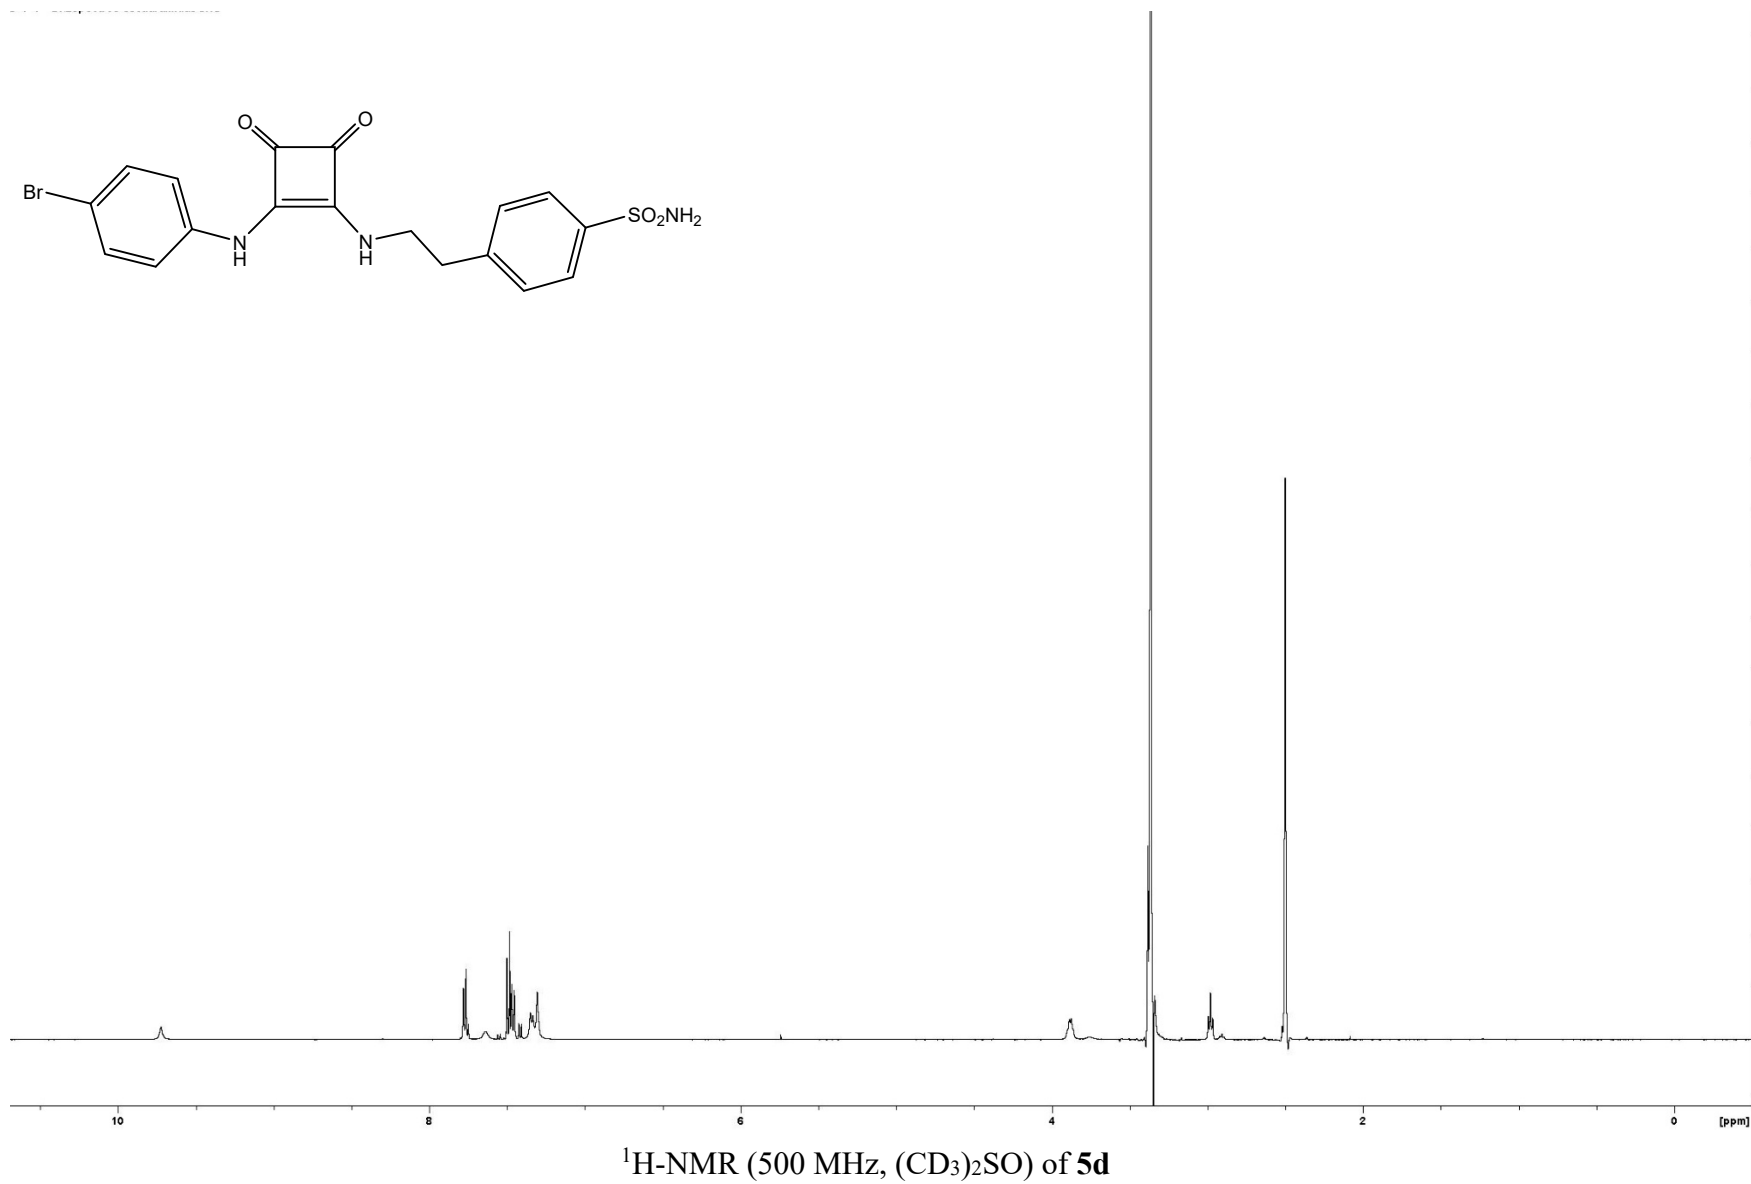



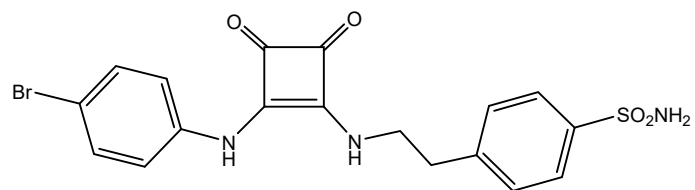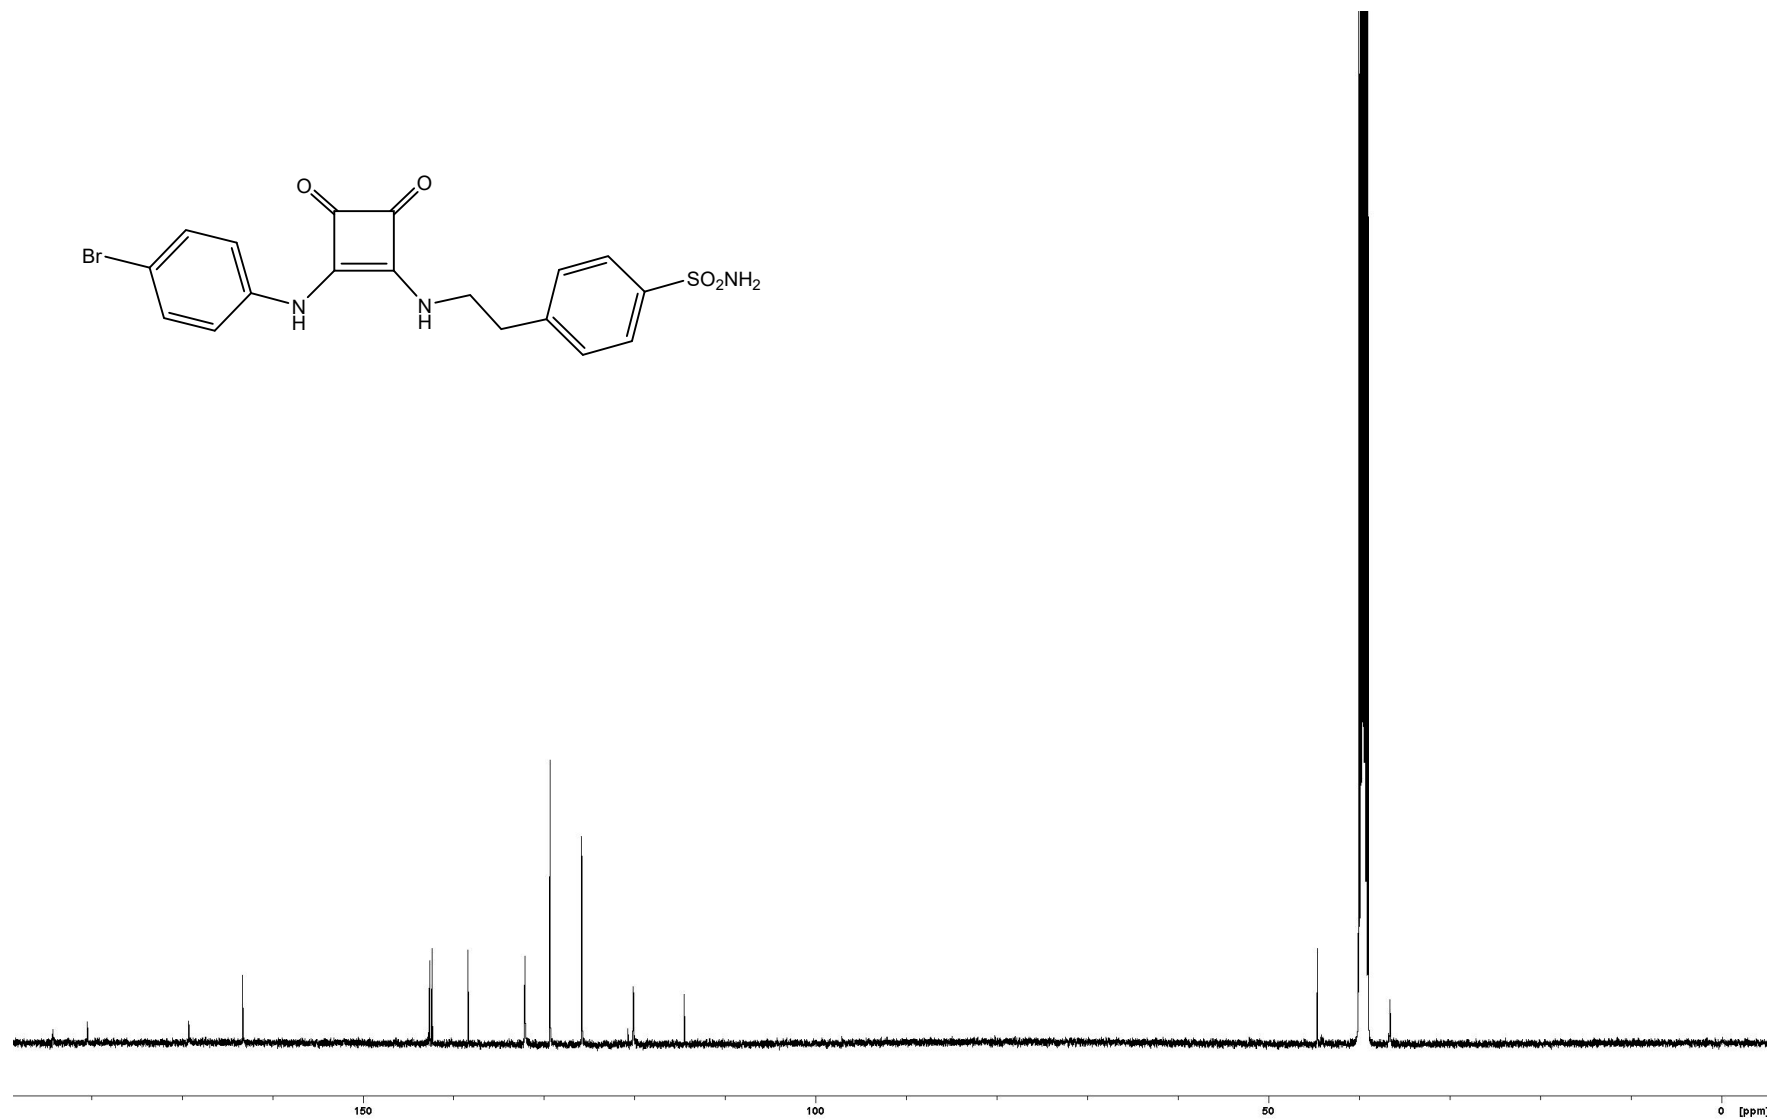

$^{13}\text{C}$ -NMR (125.7 MHz,  $(\text{CD}_3)_2\text{SO}$ ) of **5d**

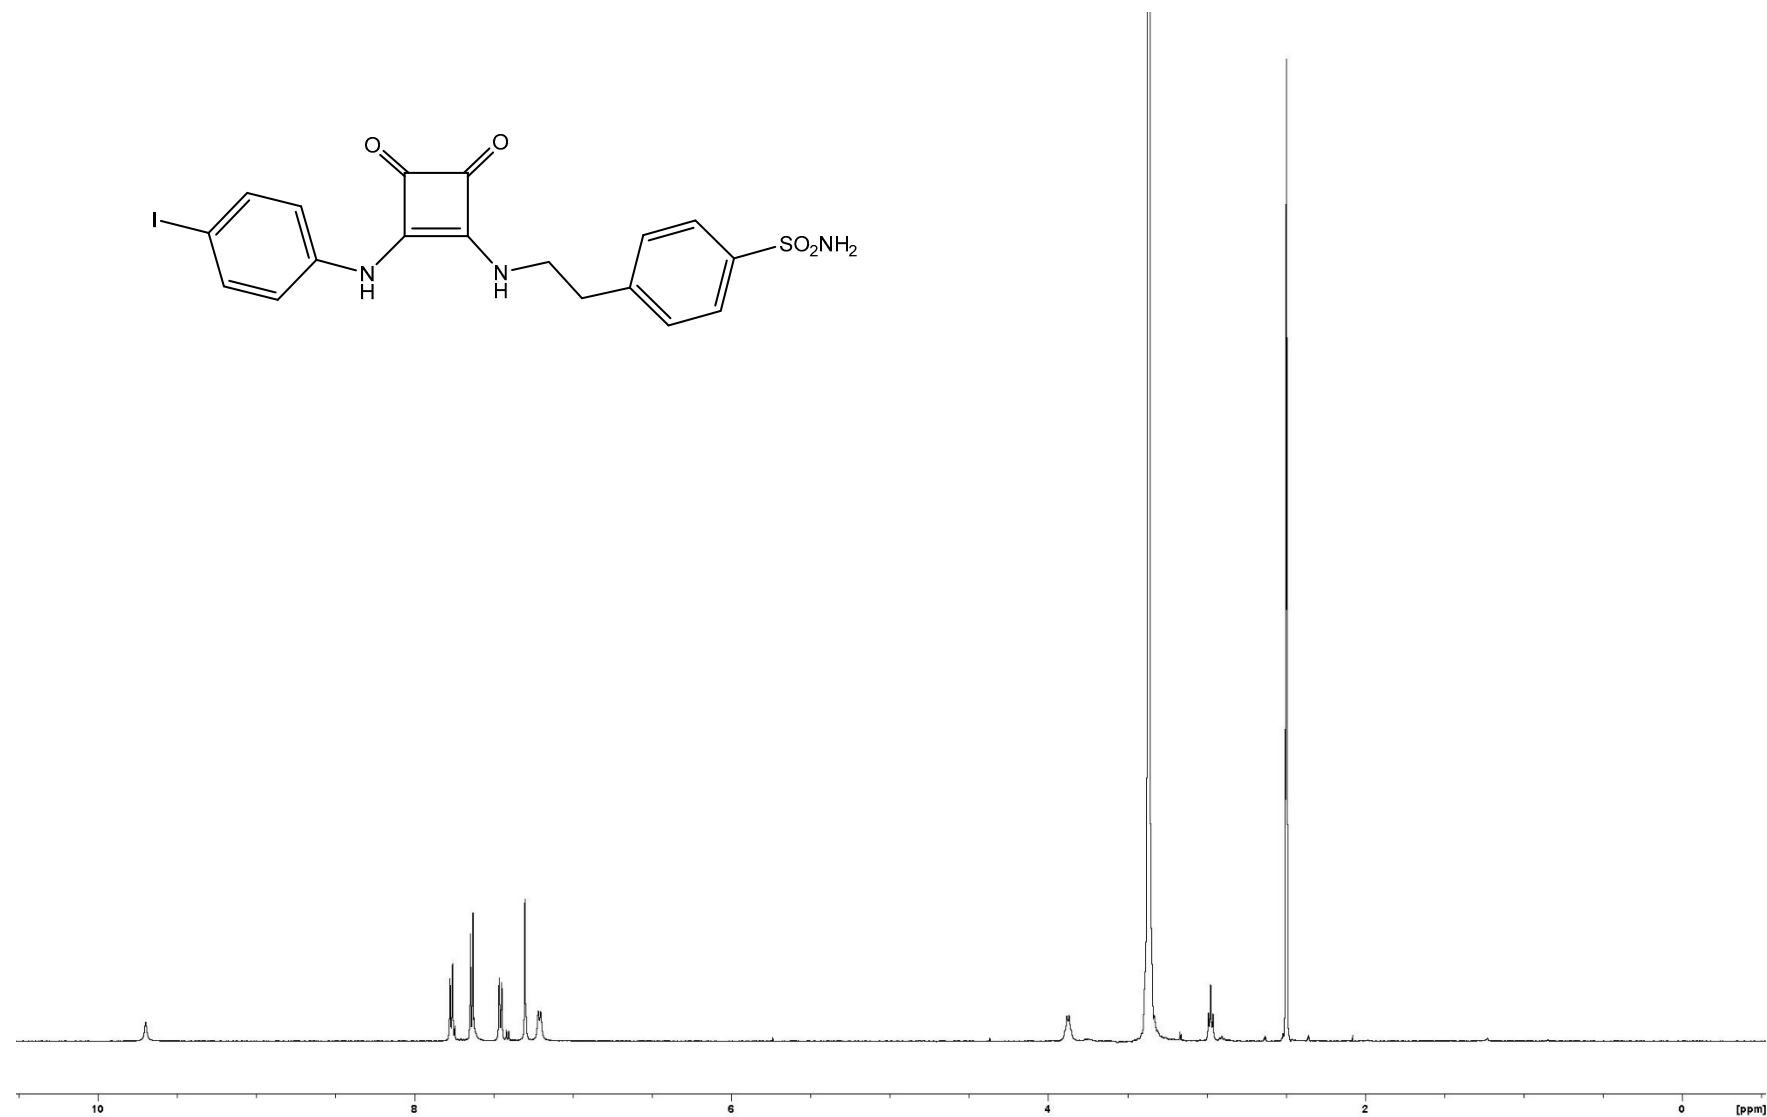

<sup>1</sup>H-NMR (500 MHz, (CD<sub>3</sub>)<sub>2</sub>SO) of **5e**

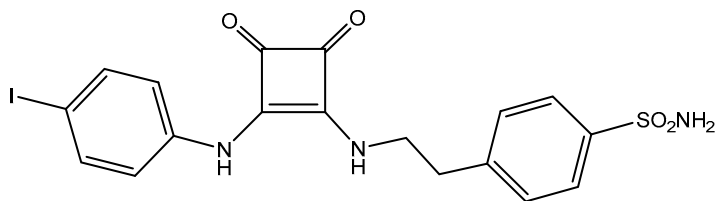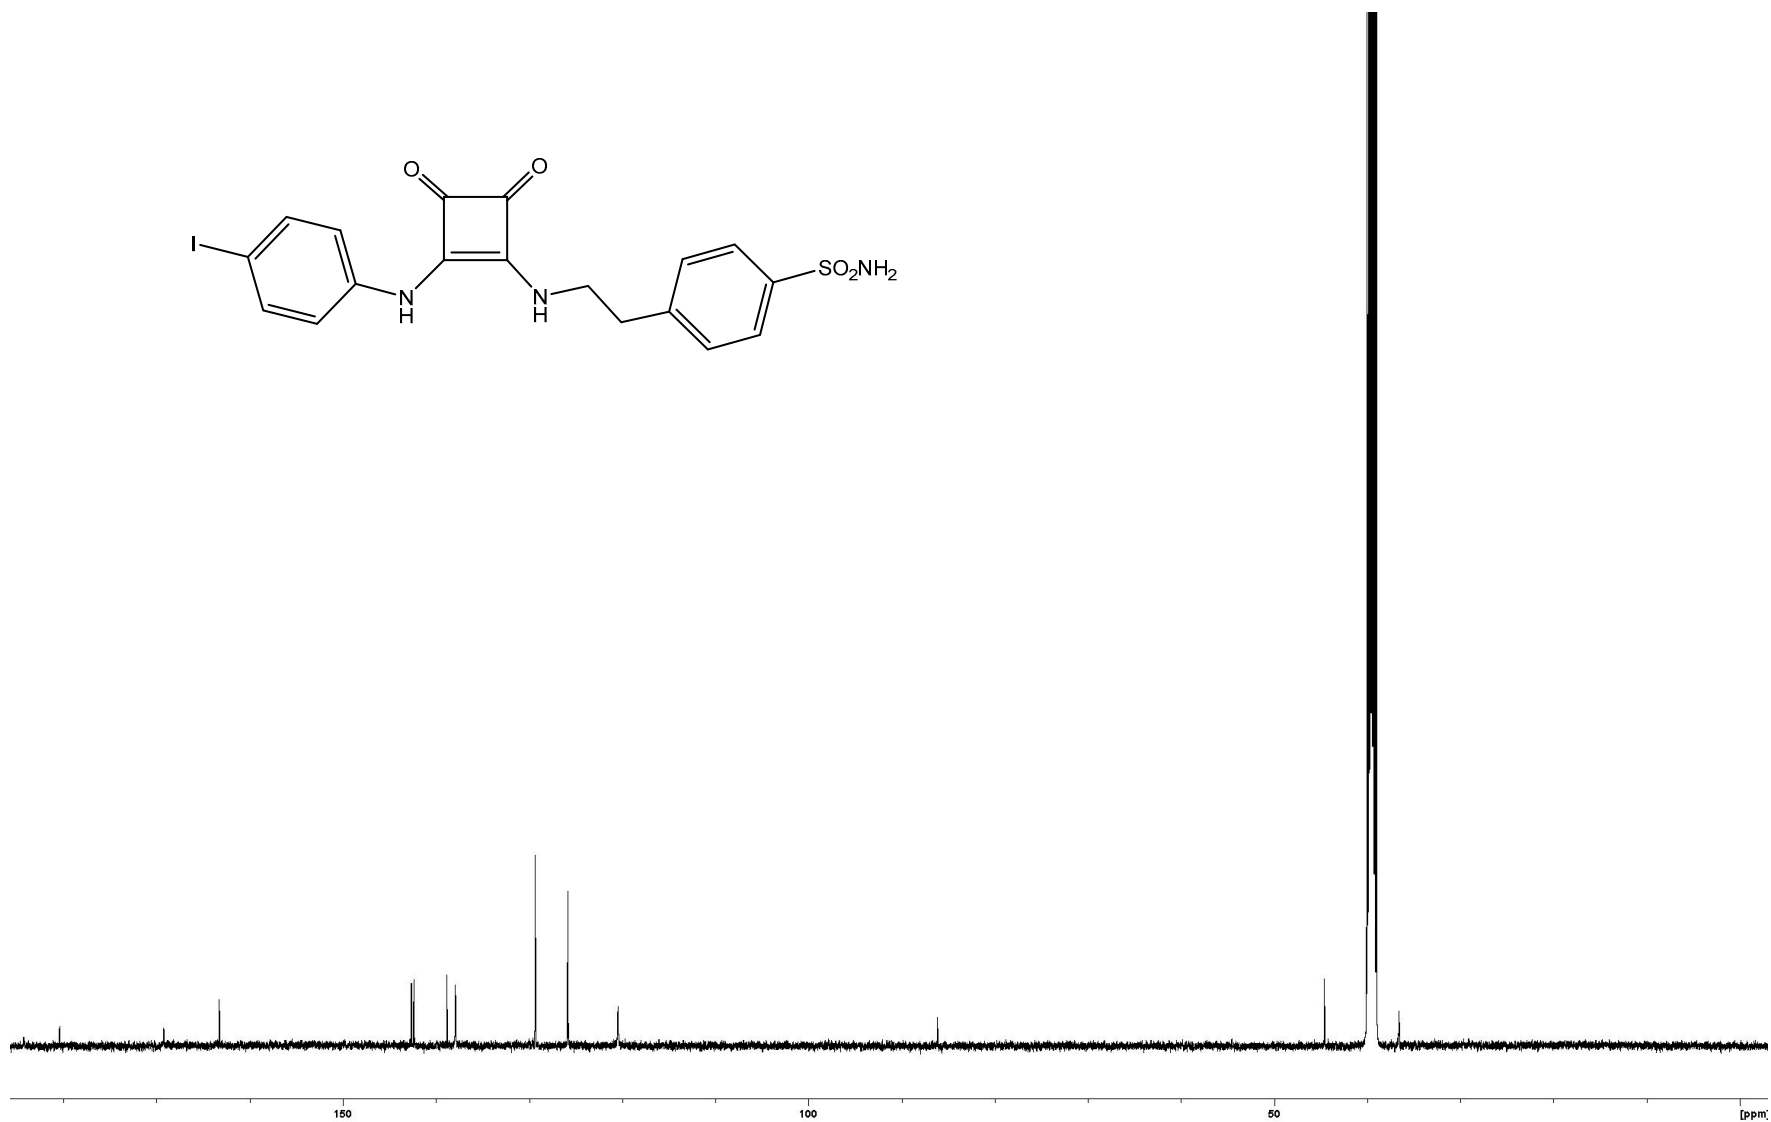

$^{13}\text{C}$ -NMR (125.7 MHz,  $(\text{CD}_3)_2\text{SO}$ ) of **5e**

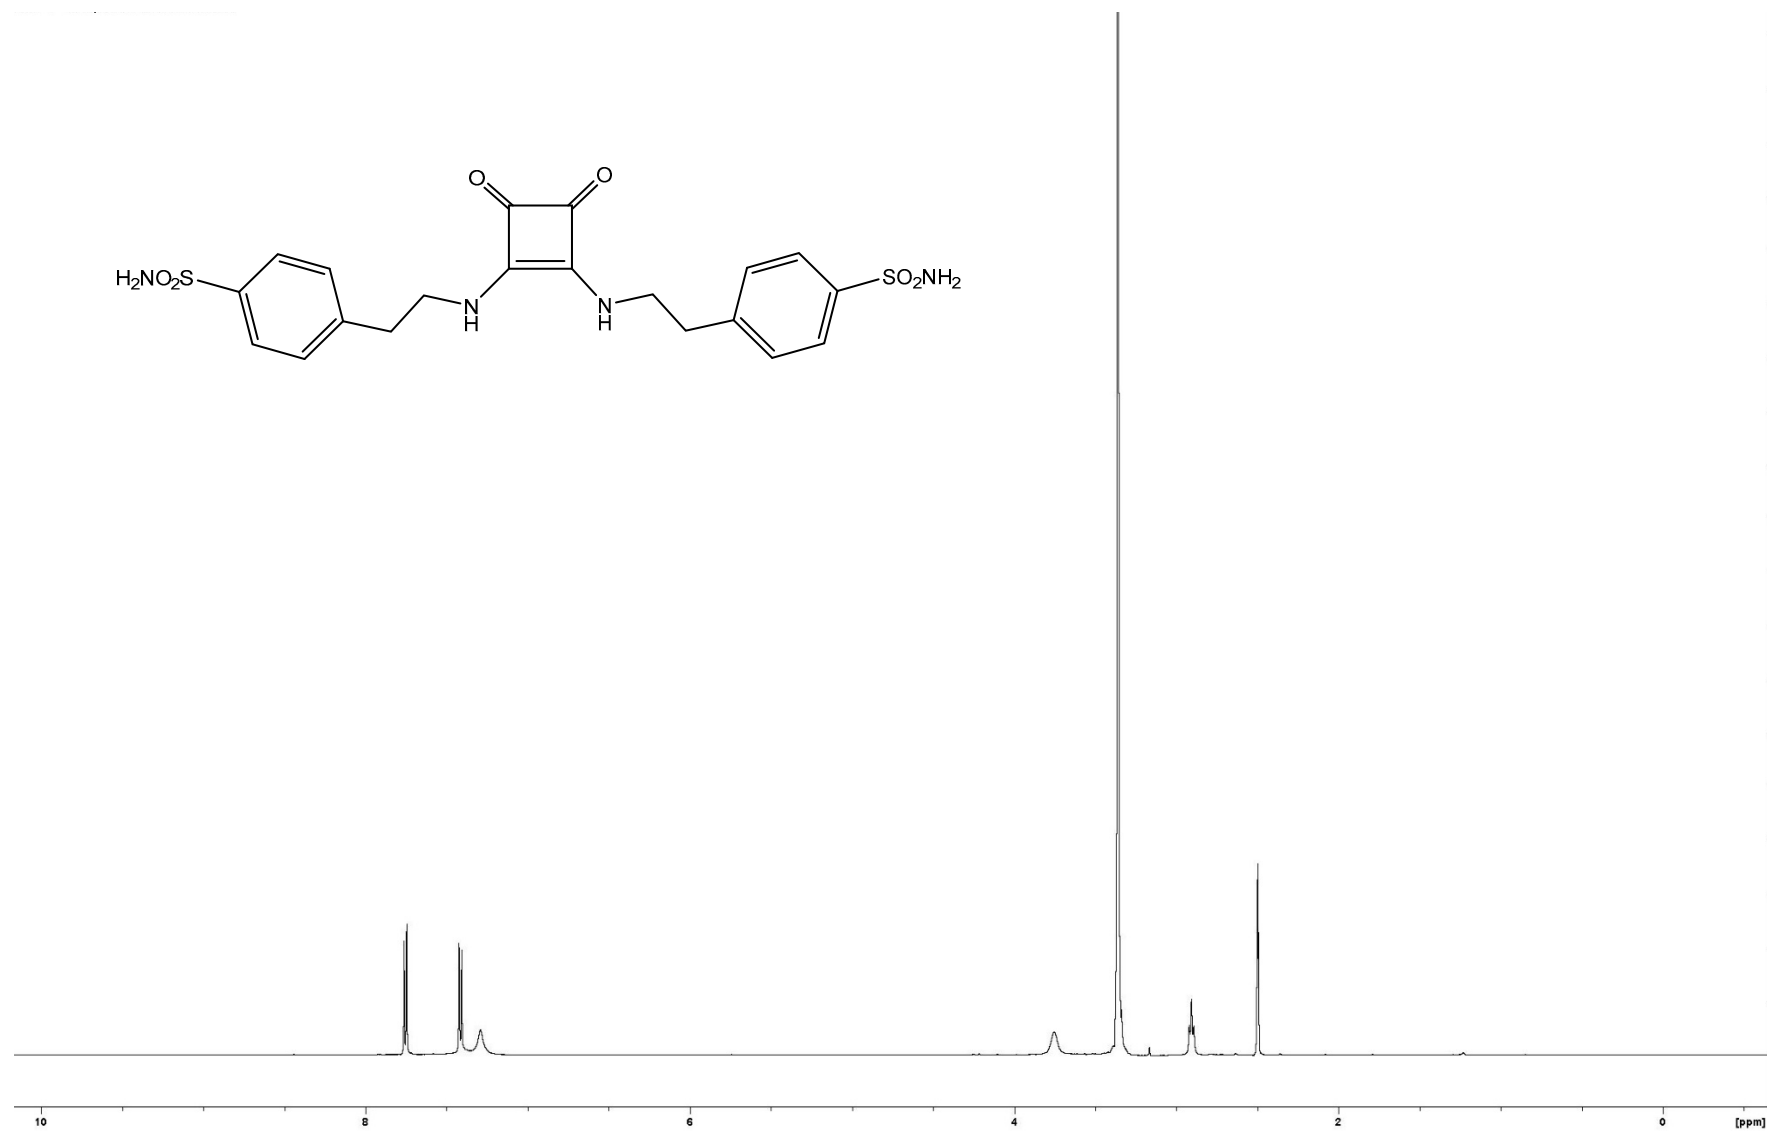

<sup>1</sup>H-NMR (500 MHz, (CD<sub>3</sub>)<sub>2</sub>SO) of **6**

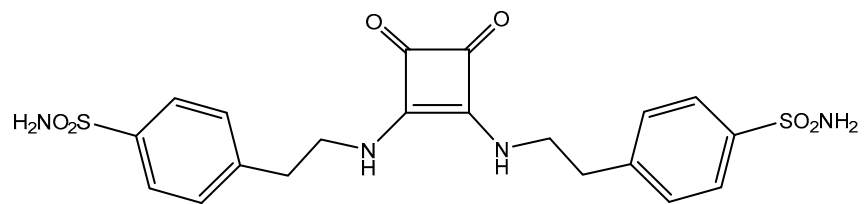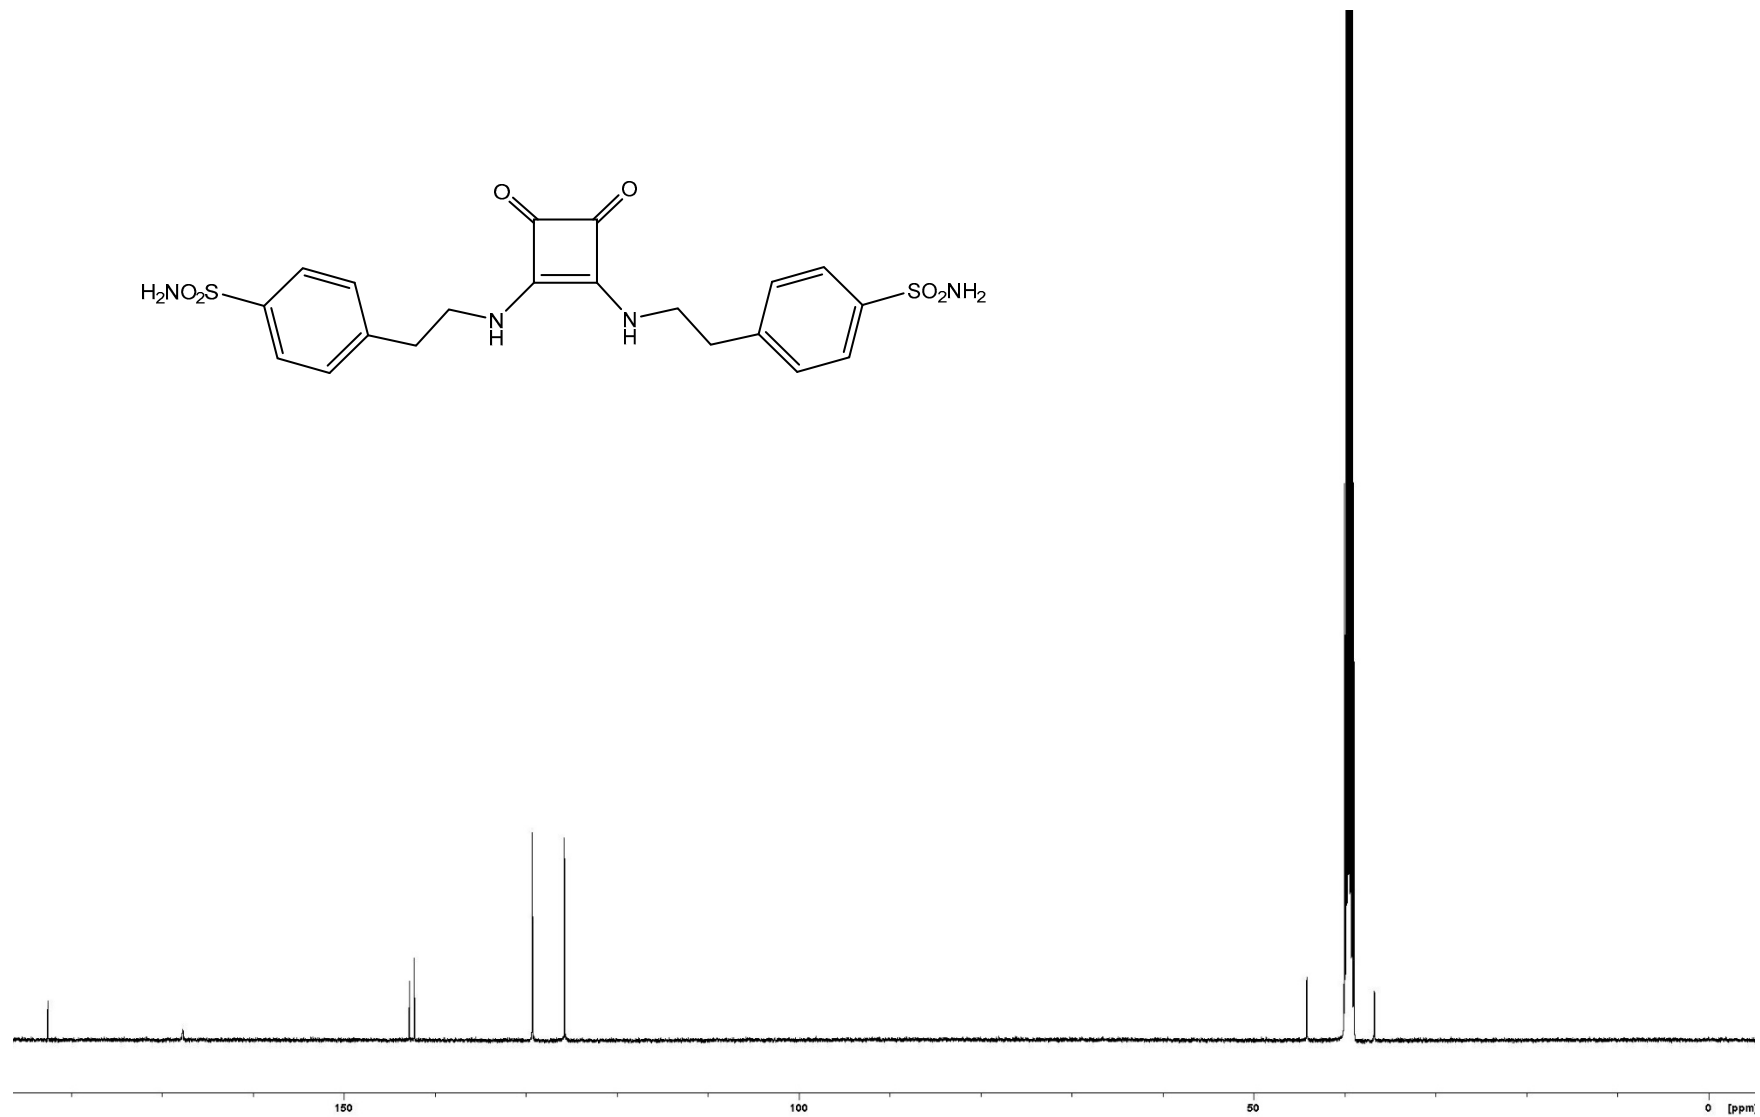

$^{13}\text{C}$ -NMR (125.7 MHz,  $(\text{CD}_3)_2\text{SO}$ ) of **6**

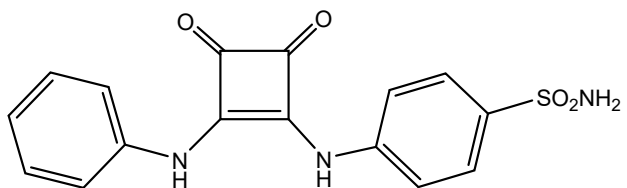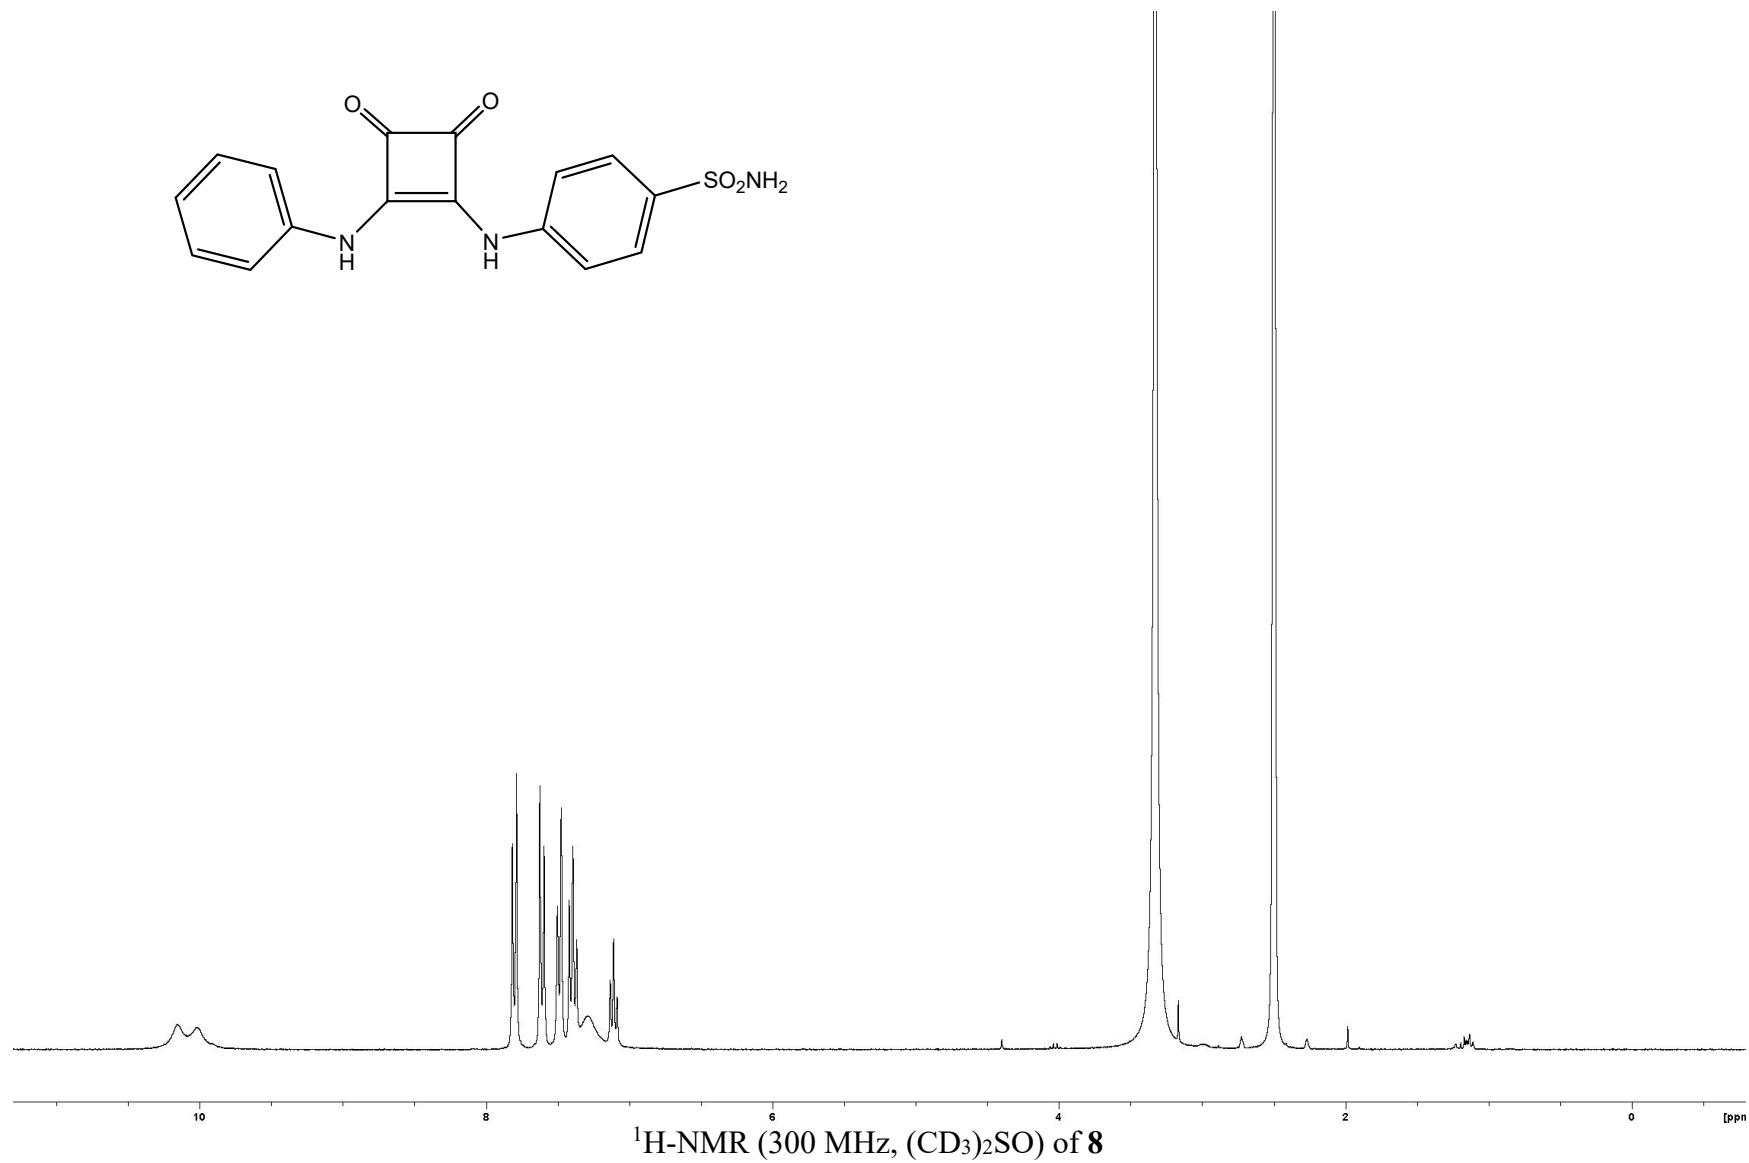

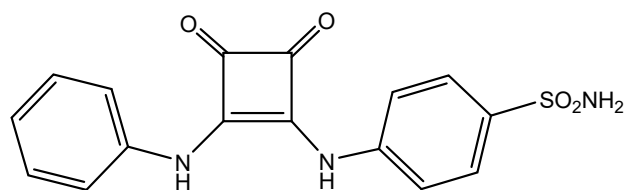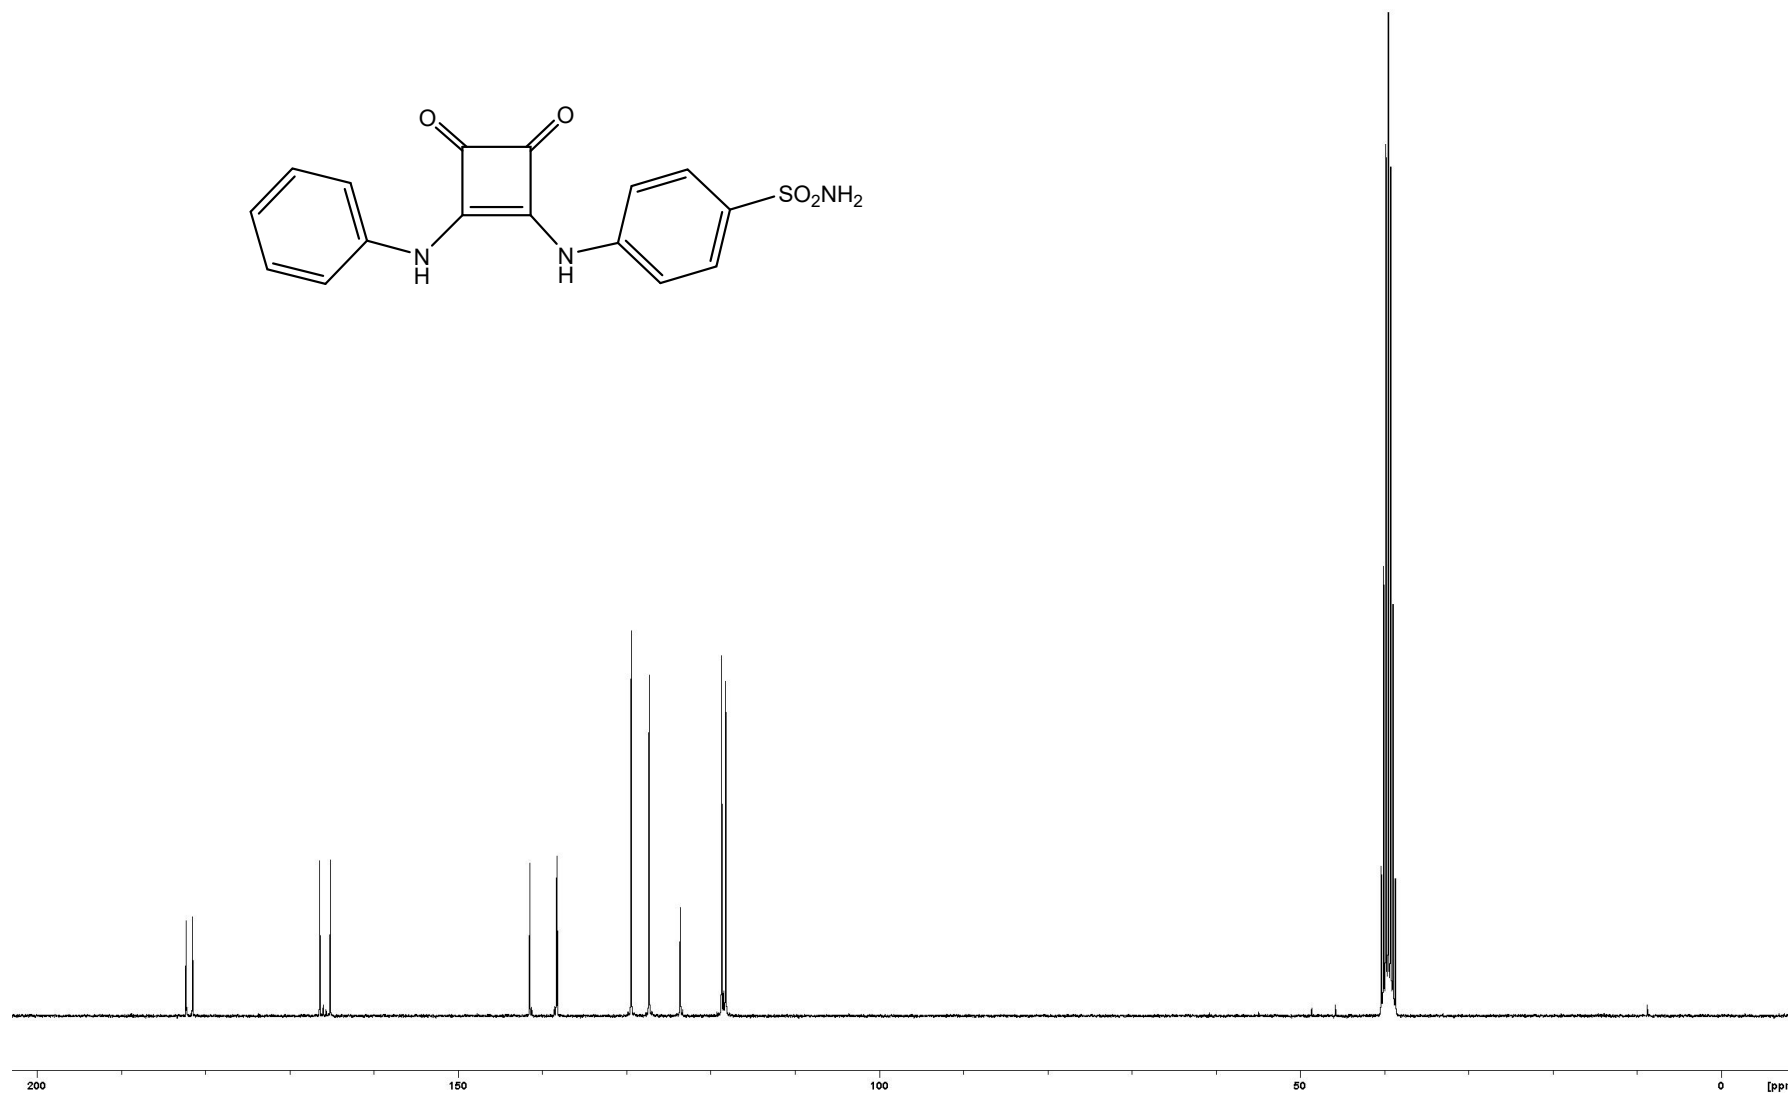

$^{13}\text{C}$ -NMR (125.7 MHz,  $(\text{CD}_3)_2\text{SO}$ ) of **8**

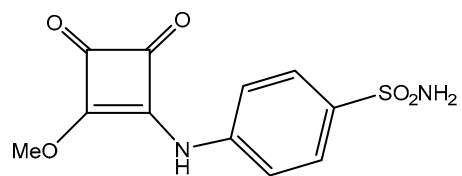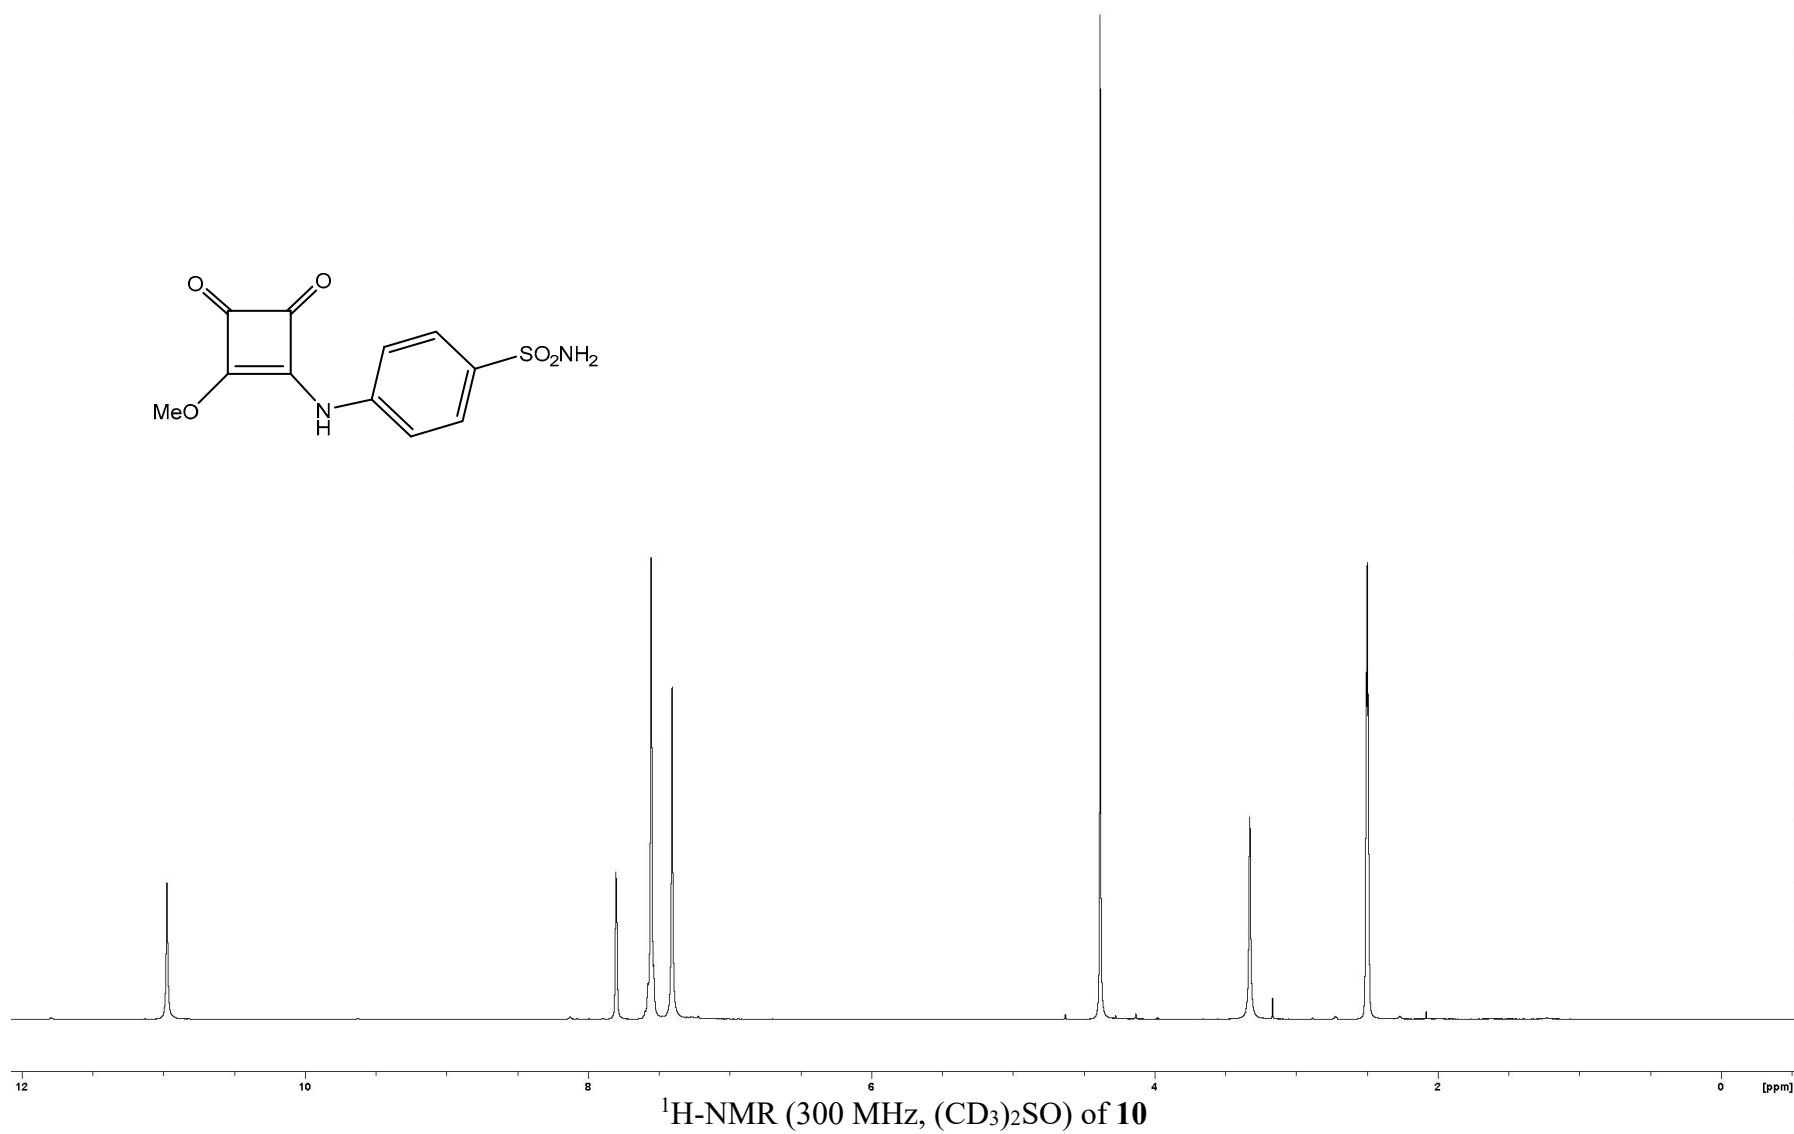



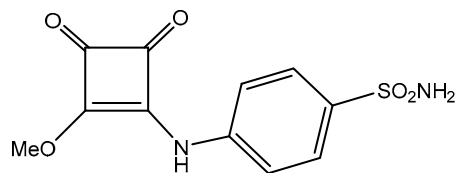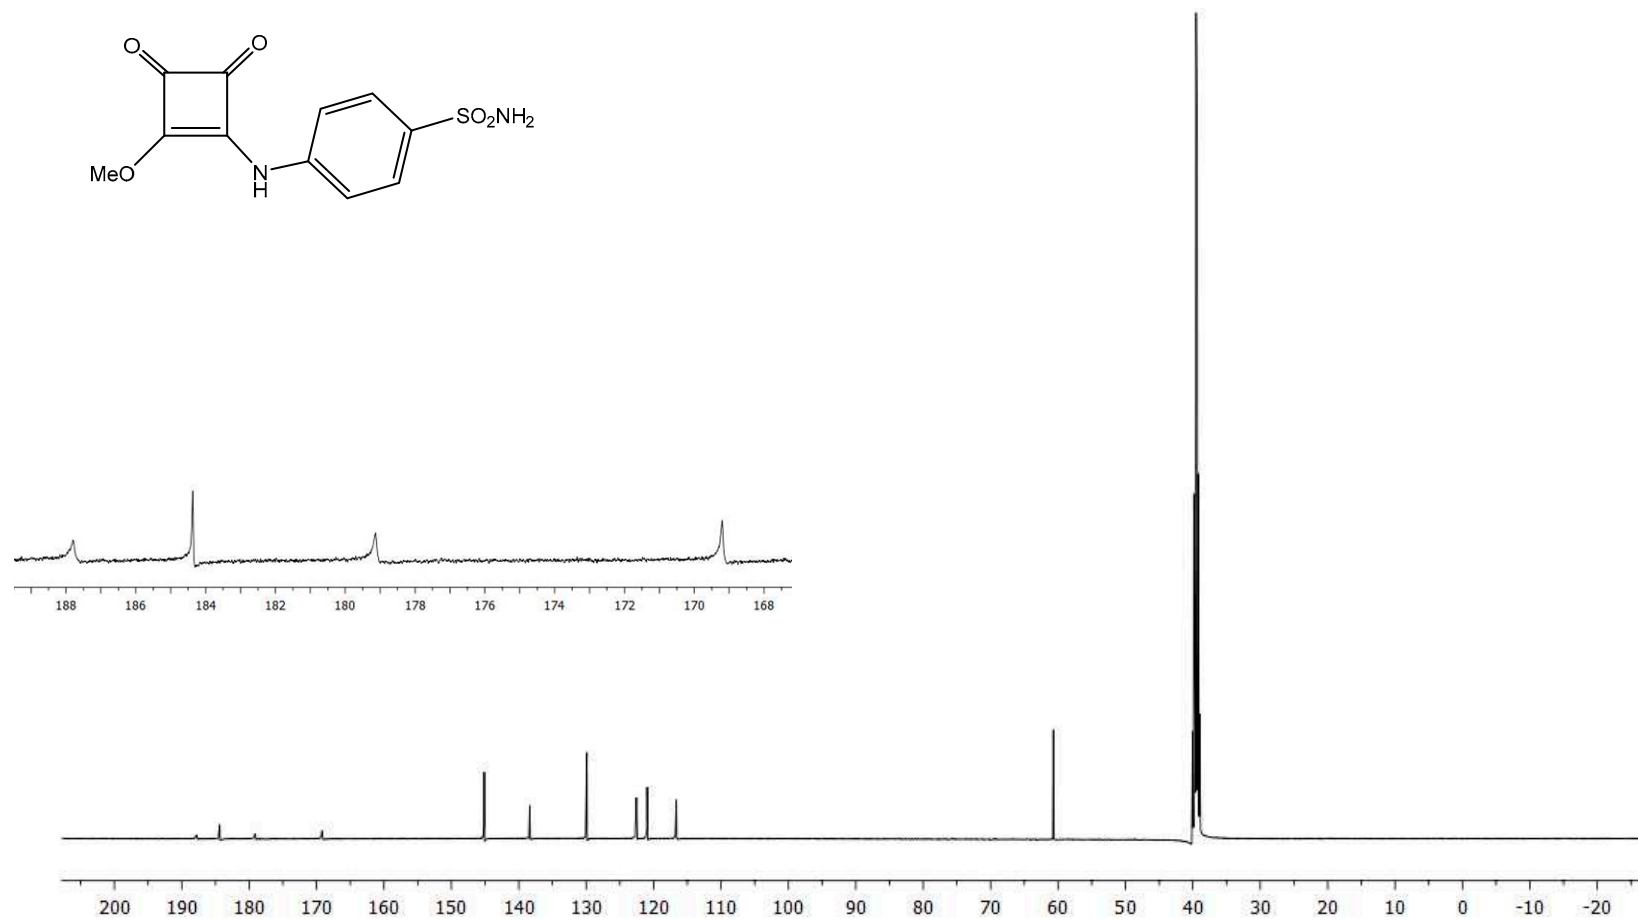

$^{13}\text{C}$ -NMR (125.7 MHz,  $(\text{CD}_3)_2\text{SO}$ ) of **10**

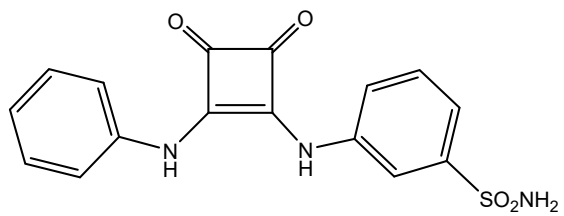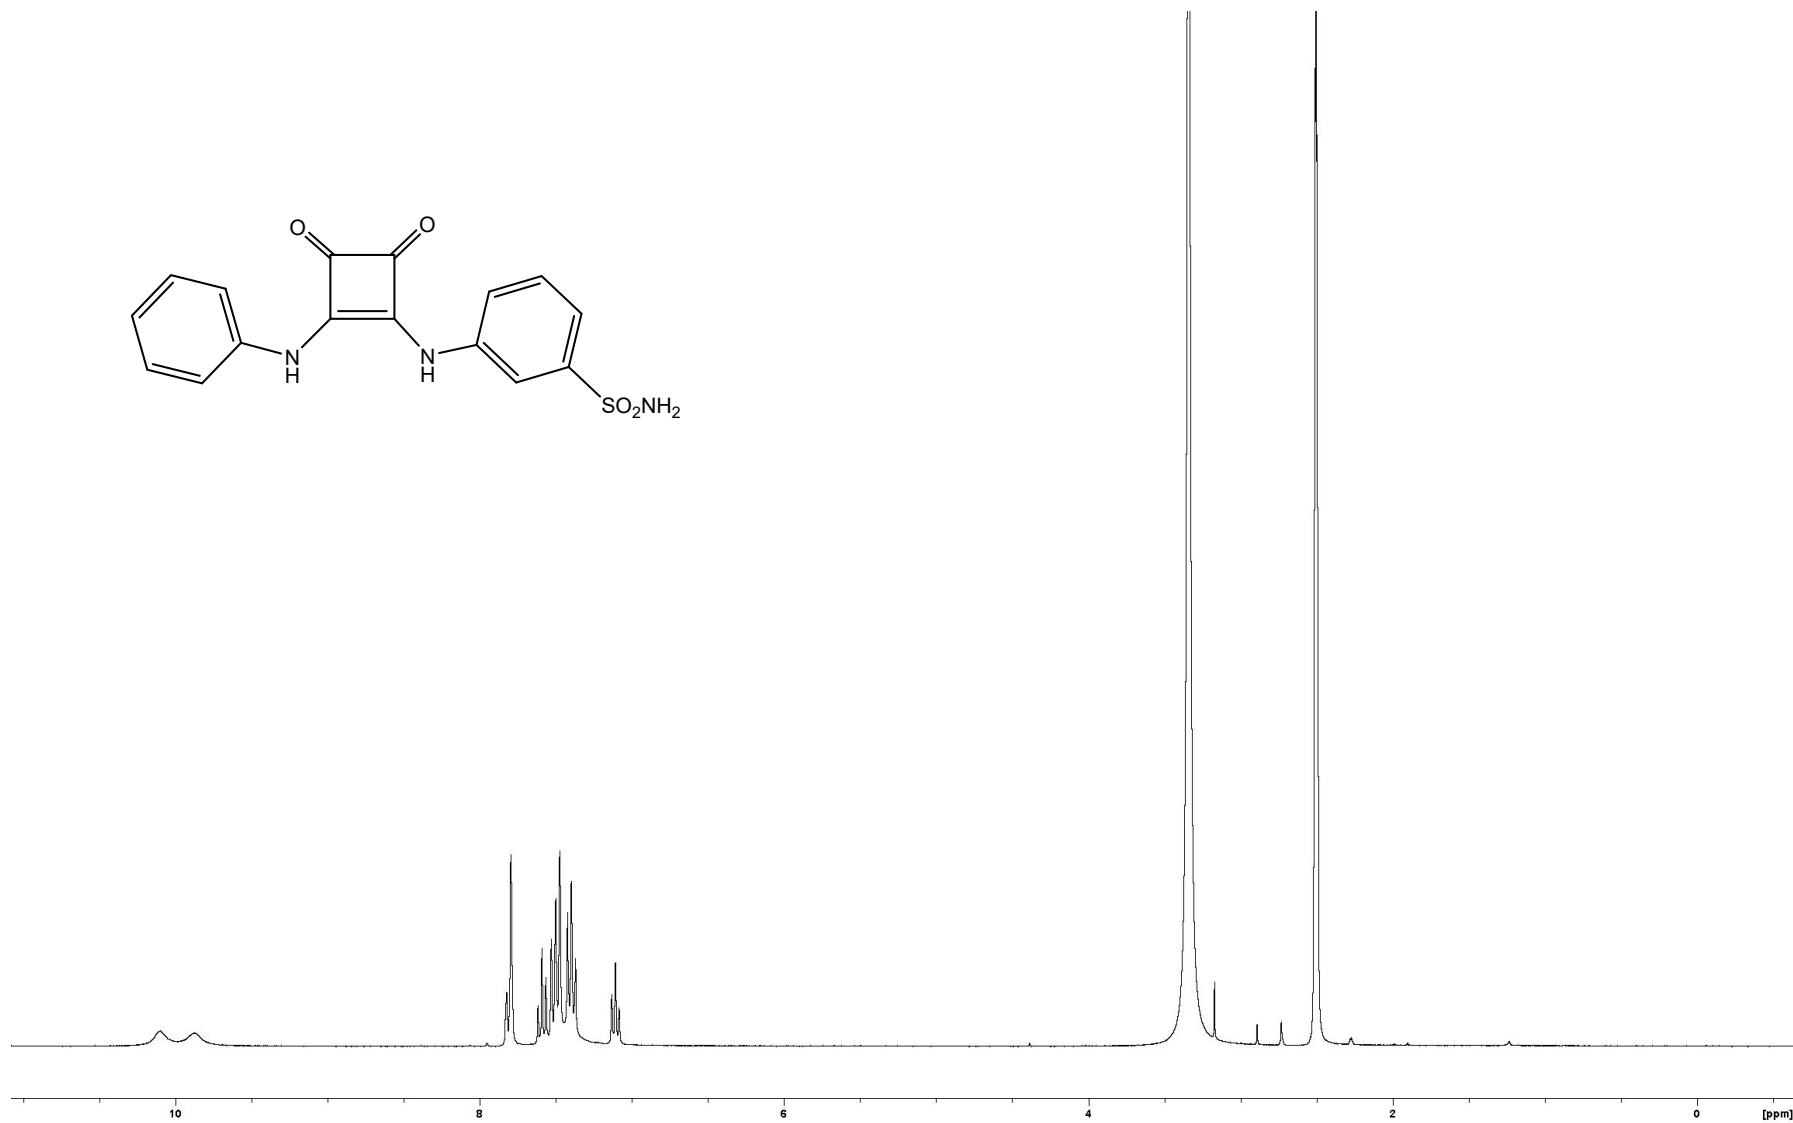

$^1\text{H}$ -NMR (300 MHz,  $(\text{CD}_3)_2\text{SO}$ ) of **11**

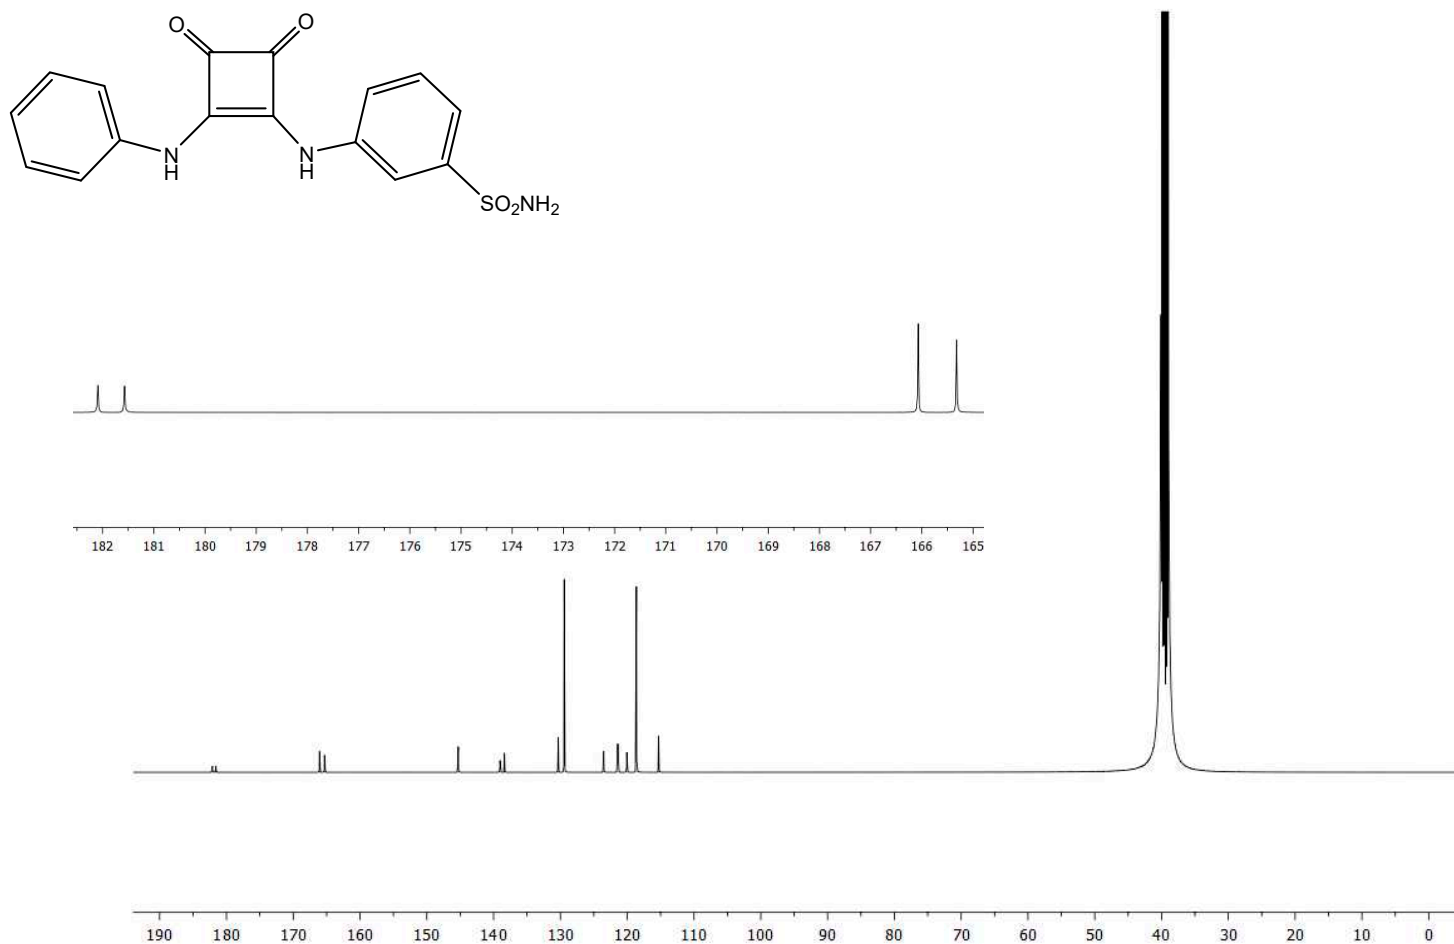

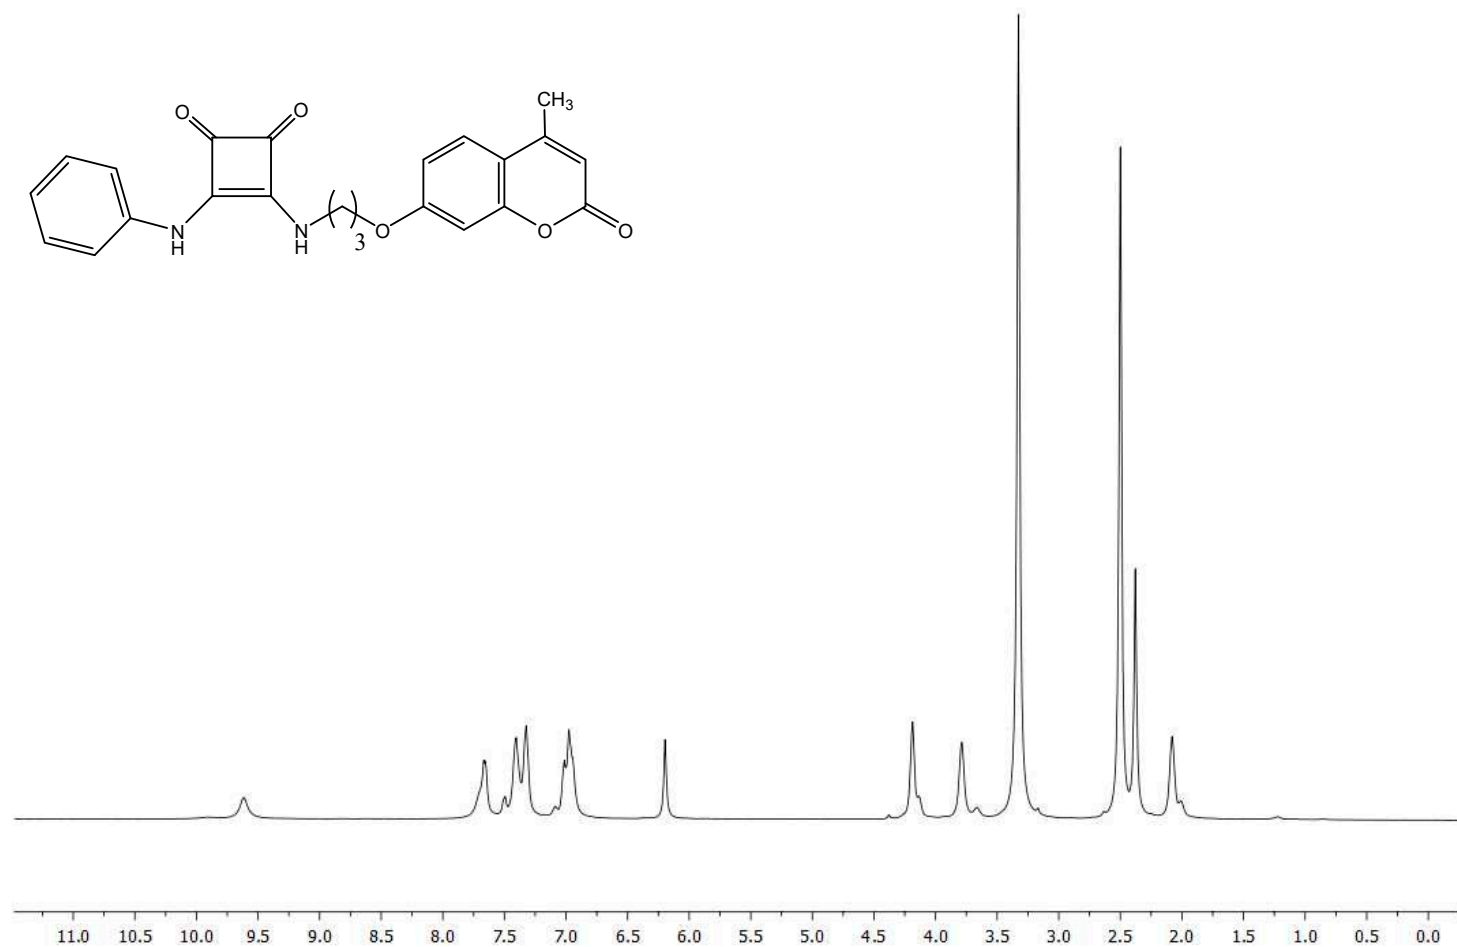

$^1\text{H-NMR}$  (500 MHz,  $(\text{CD}_3)_2\text{SO}$ ) of **16a**

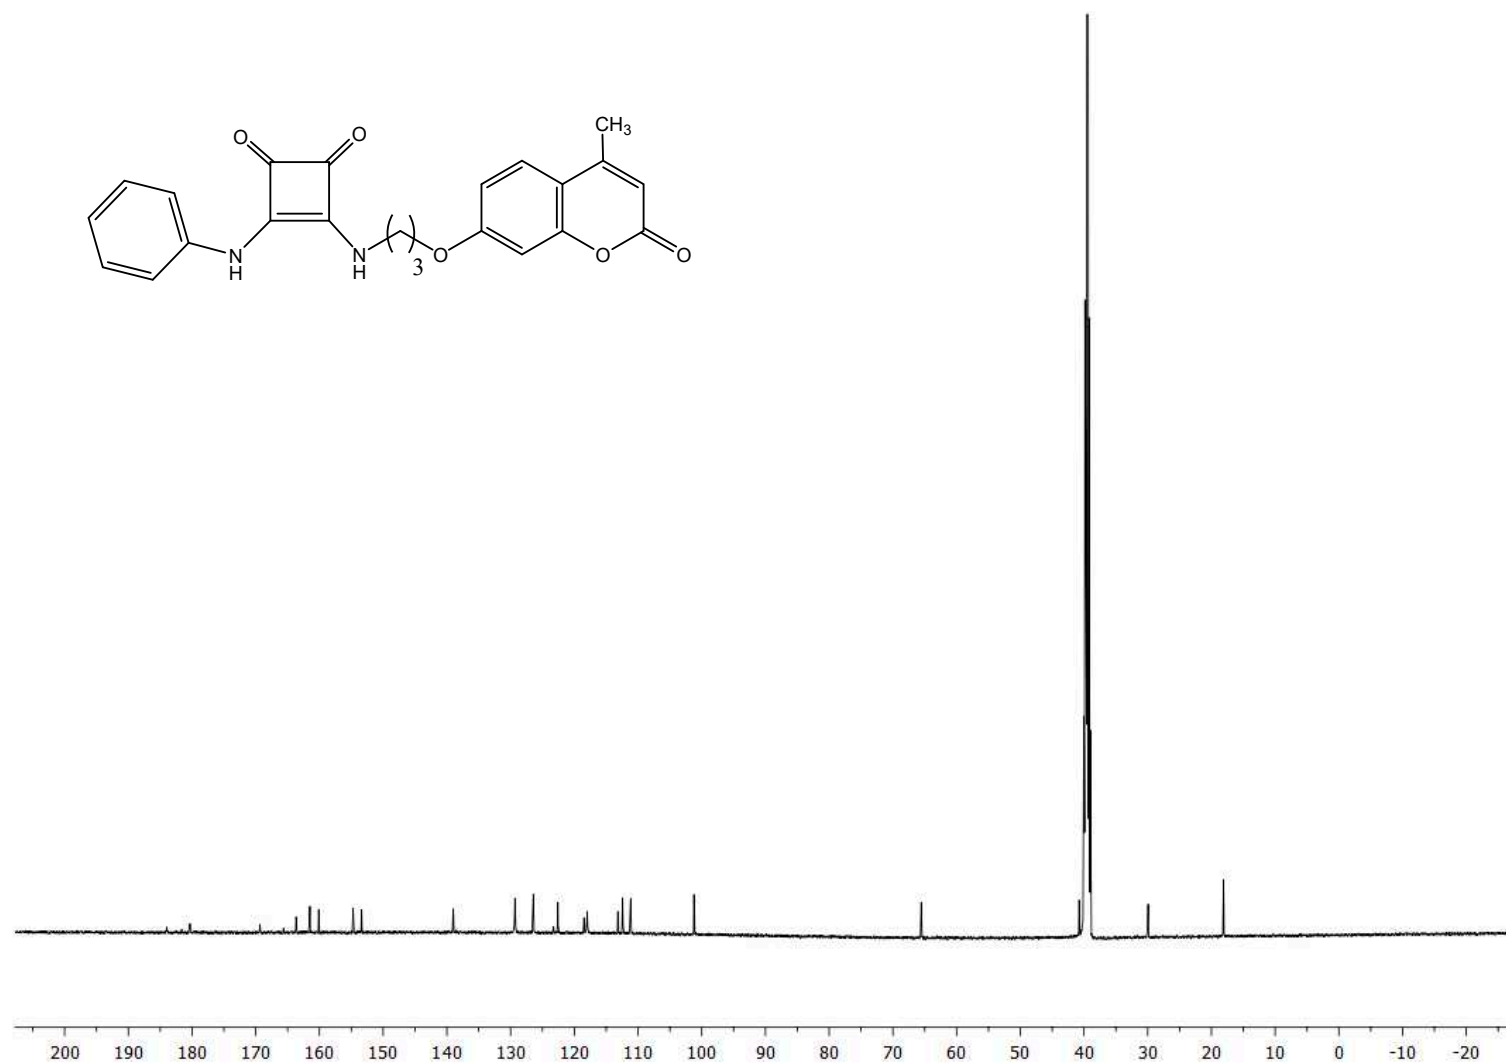

$^{13}\text{C}$ -NMR (125.7 MHz,  $(\text{CD}_3)_2\text{SO}$ ) of **16a**

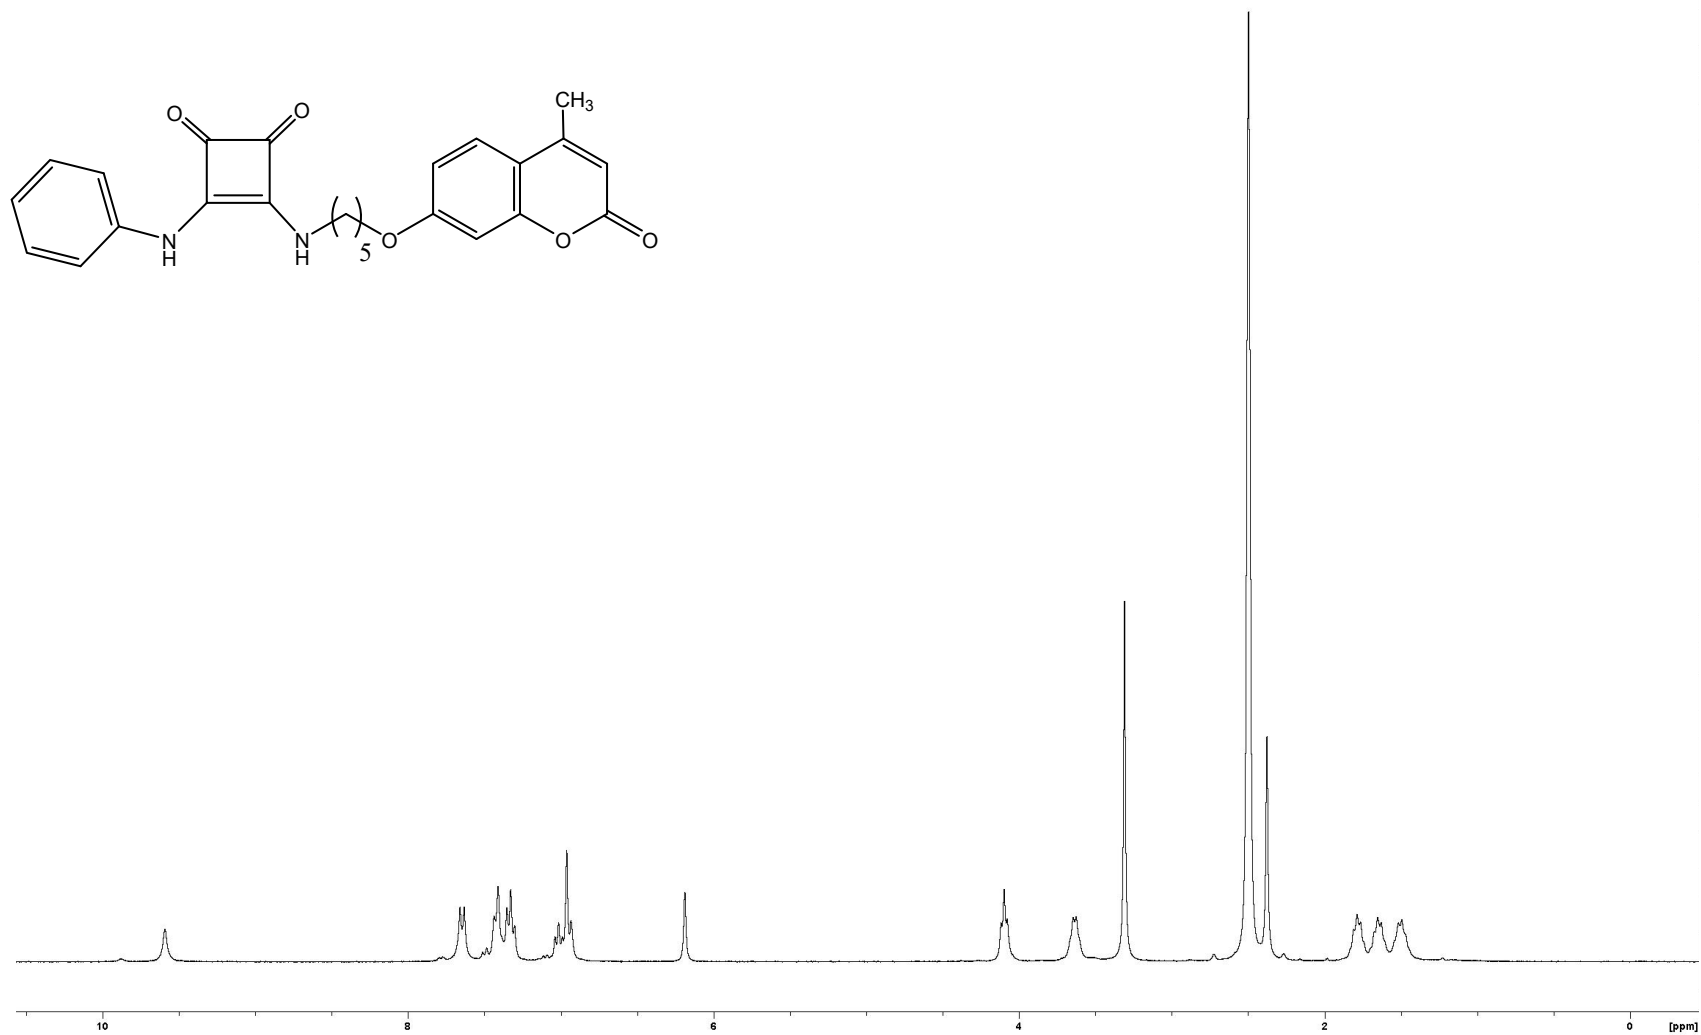

$^1\text{H}$ -NMR (300 MHz,  $(\text{CD}_3)_2\text{SO}$ ) of **16b**

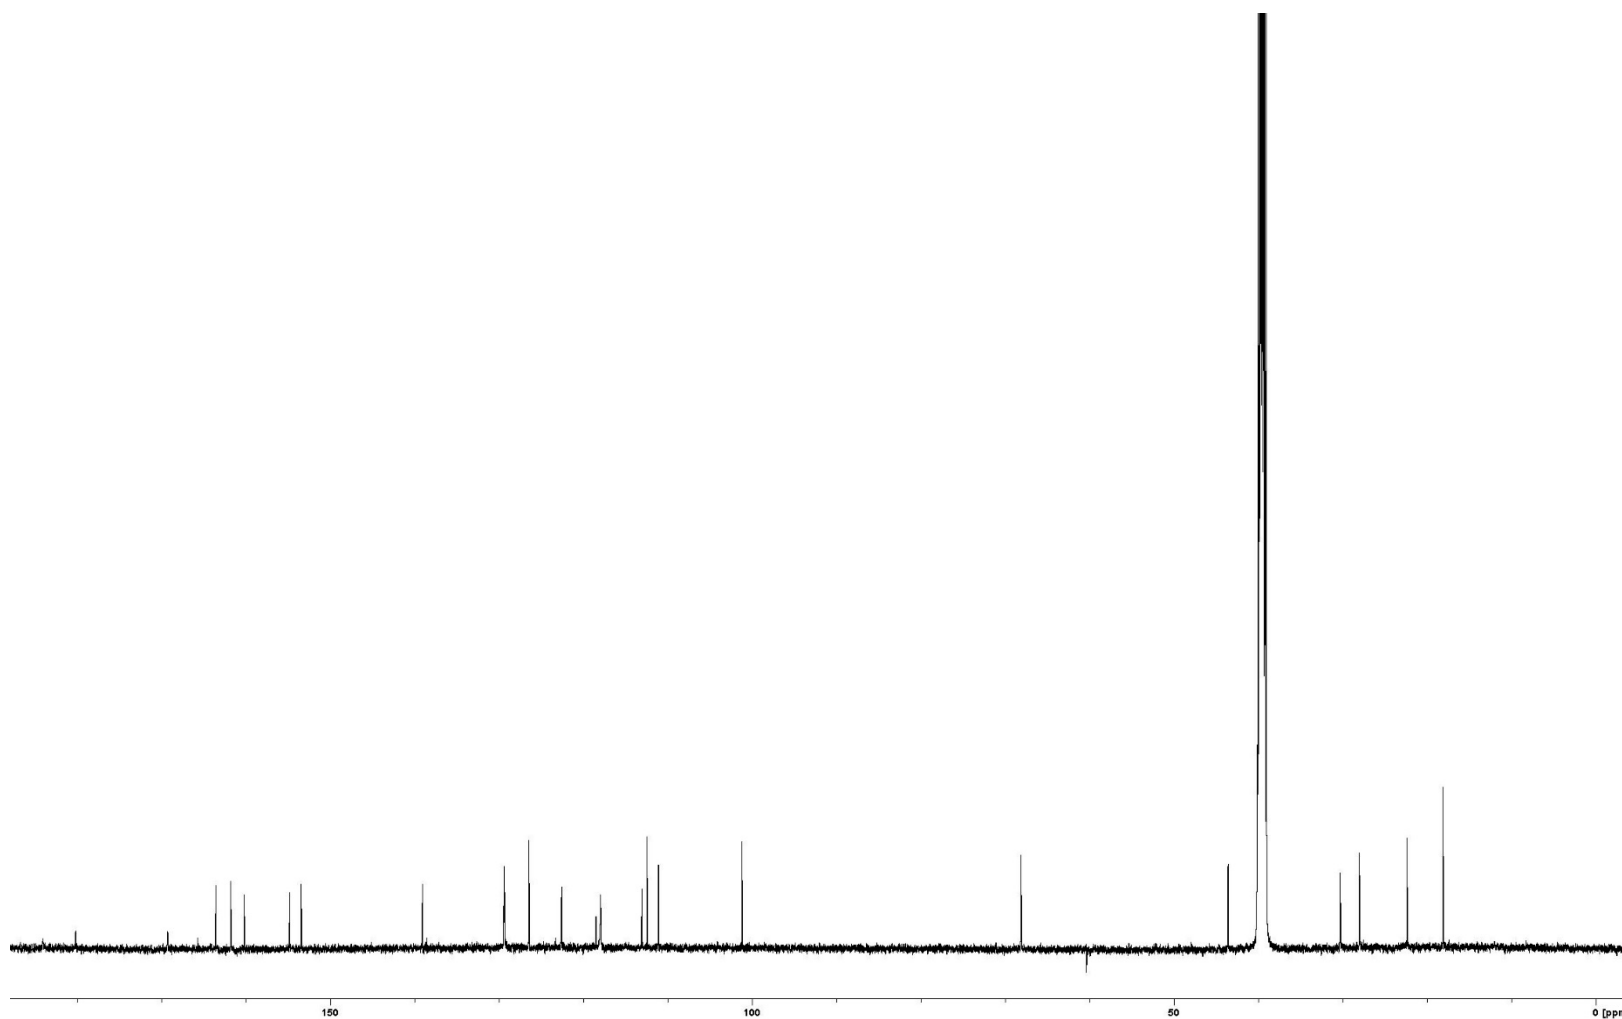

$^{13}\text{C}$ -NMR (125.7 MHz,  $(\text{CD}_3)_2\text{SO}$ ) of **16b**

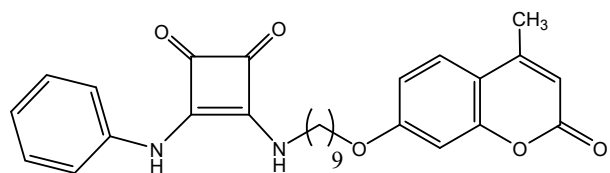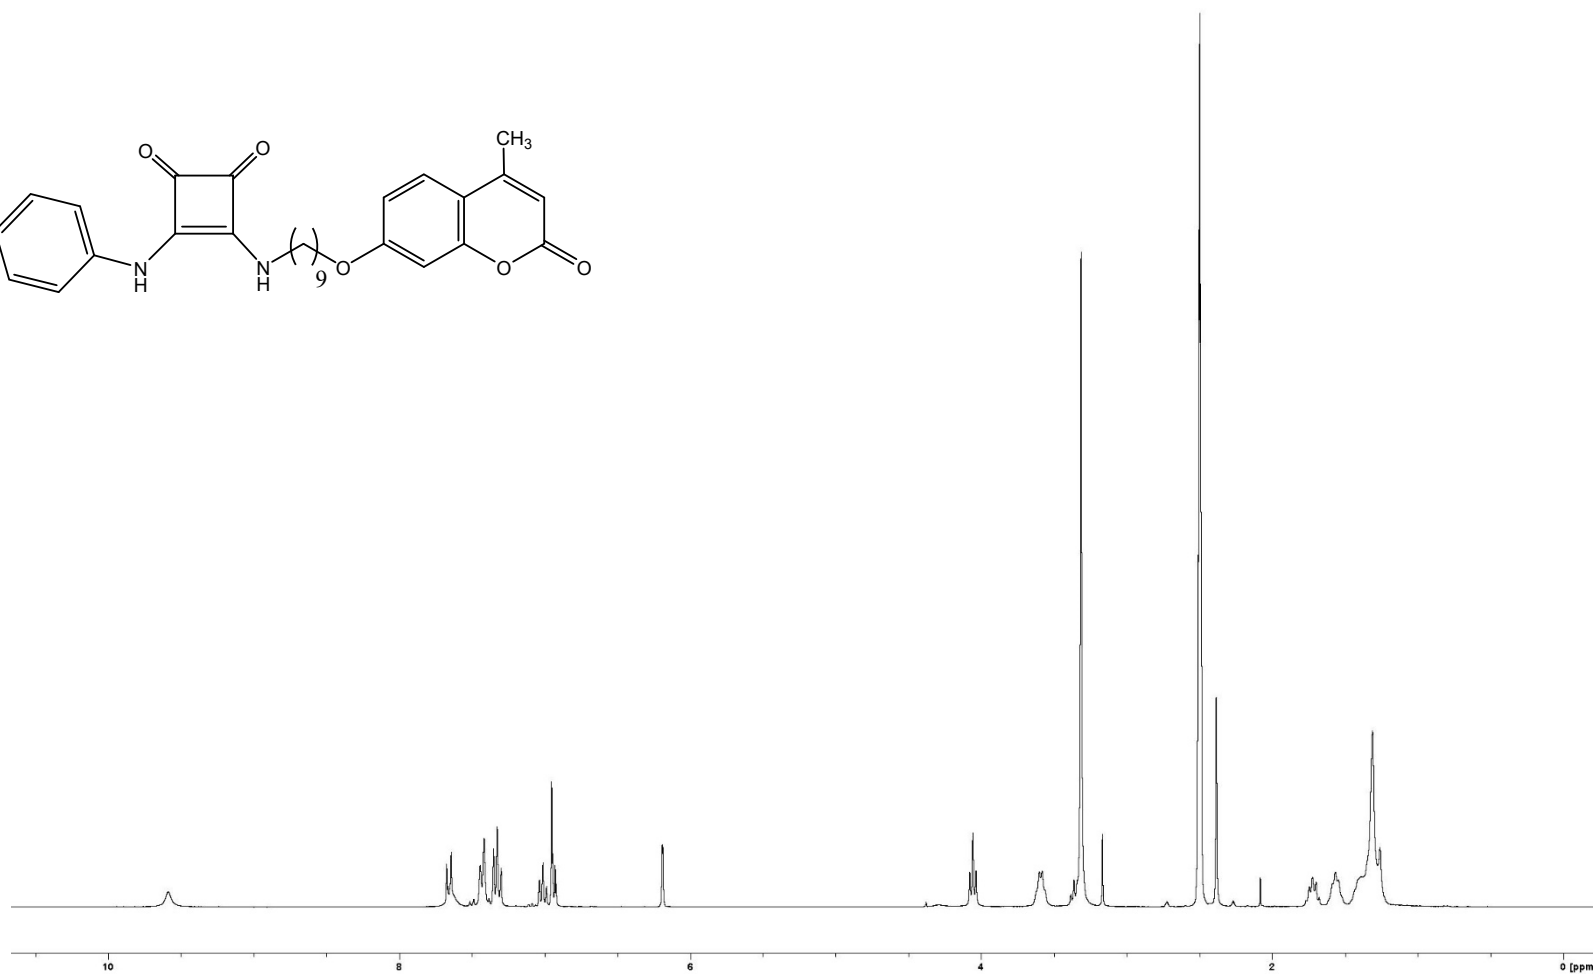

$^1\text{H-NMR}$  (300 MHz,  $(\text{CD}_3)_2\text{SO}$ ) of **16c**



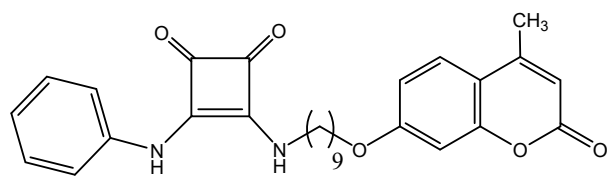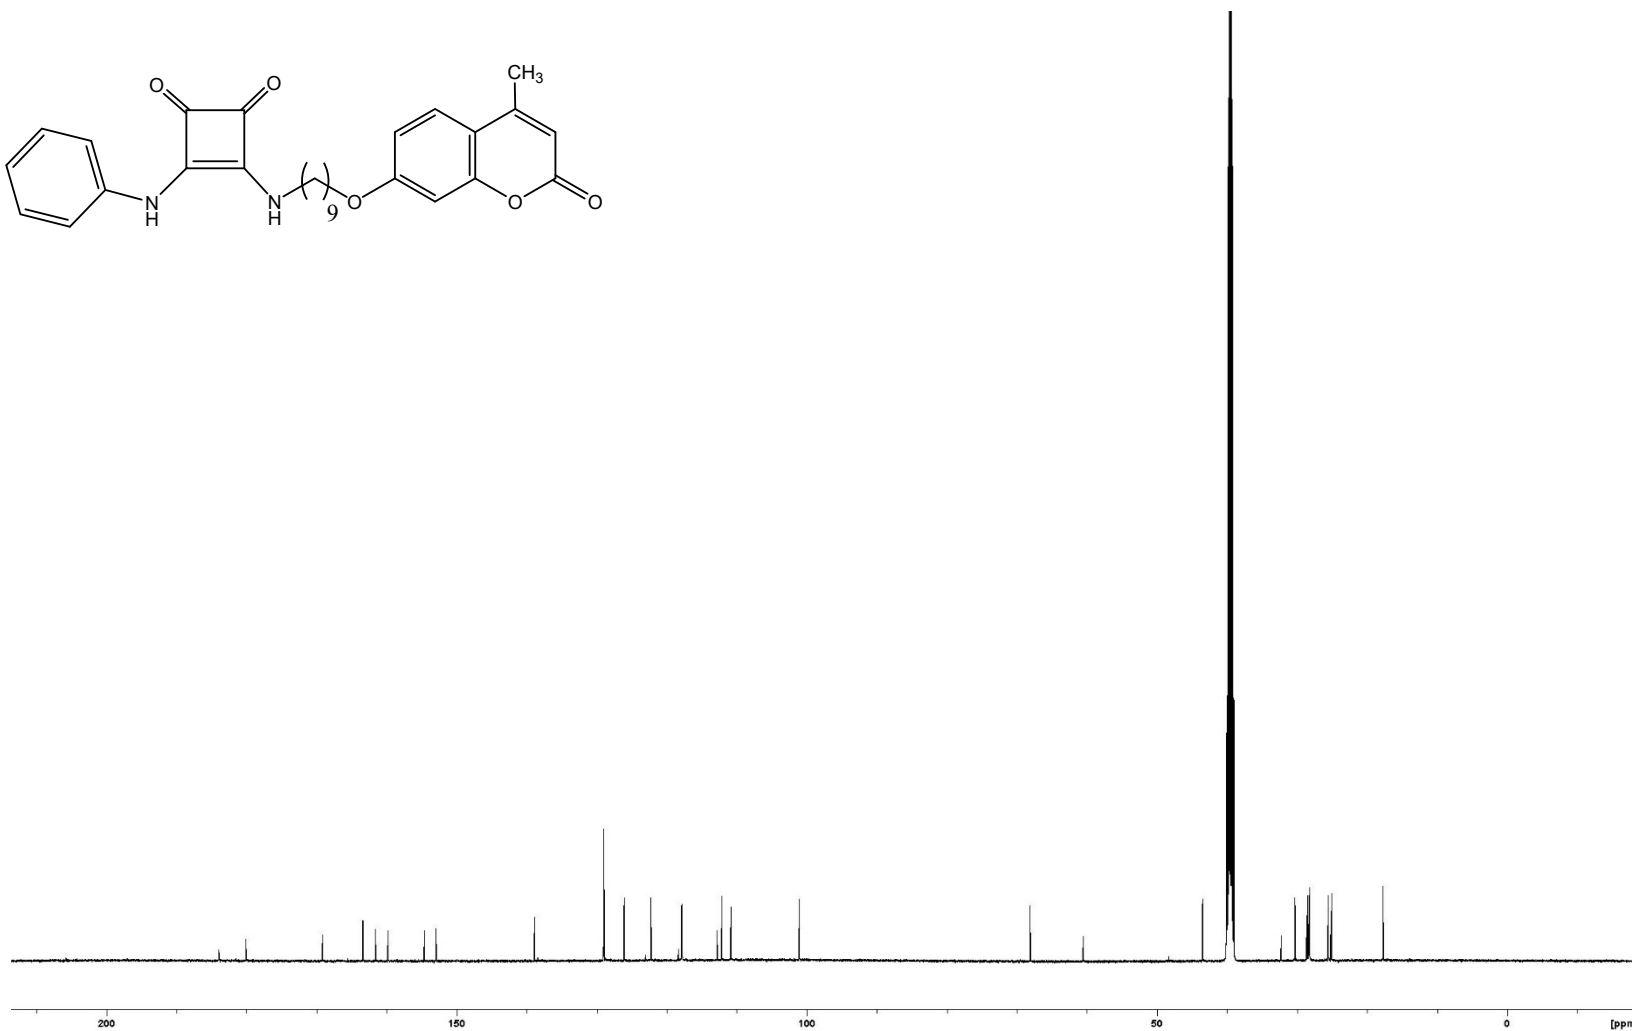

$^{13}\text{C}$ -NMR (125.7 MHz,  $(\text{CD}_3)_2\text{SO}$ ) of **16c**

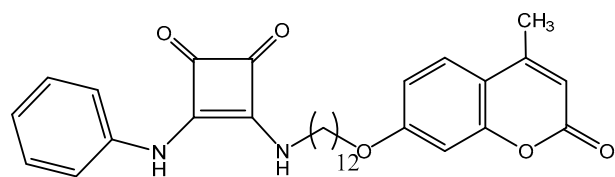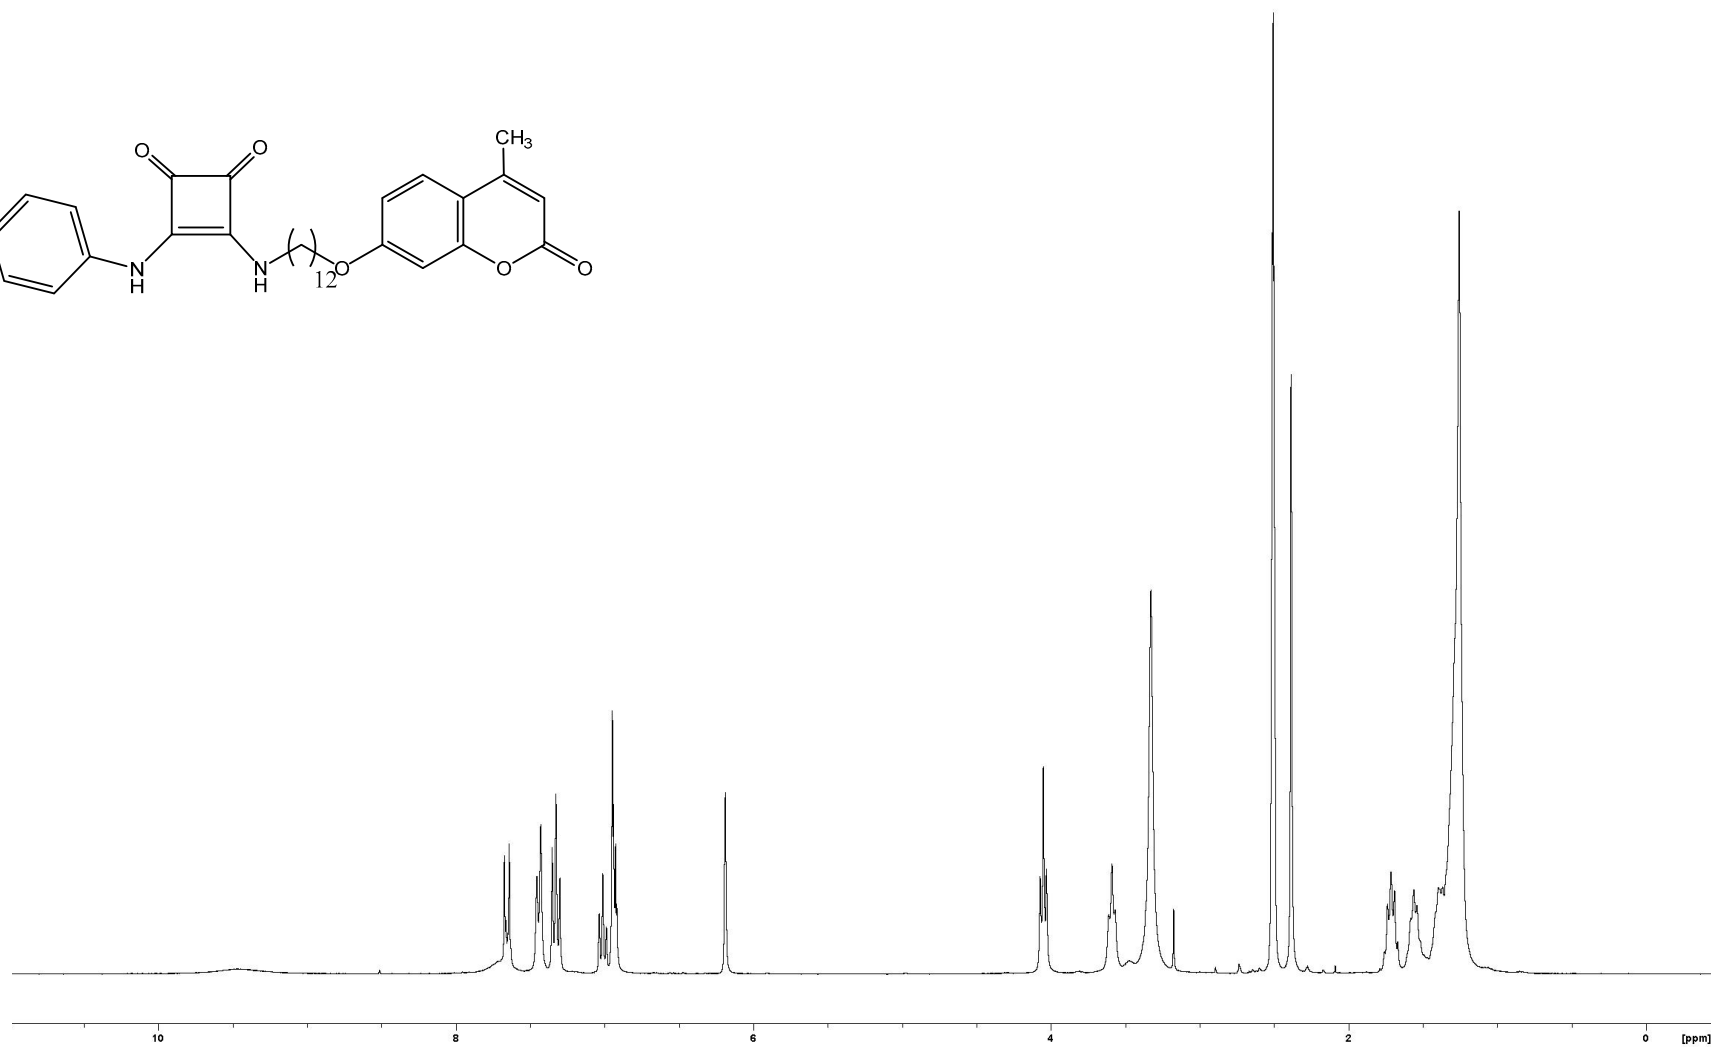

$^1\text{H}$ -NMR (300 MHz,  $(\text{CD}_3)_2\text{SO}$ ) of **16d**

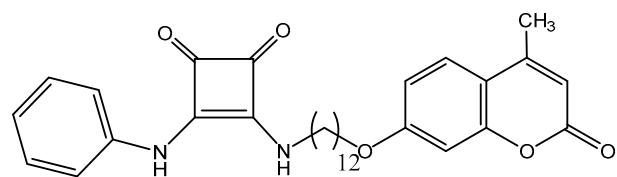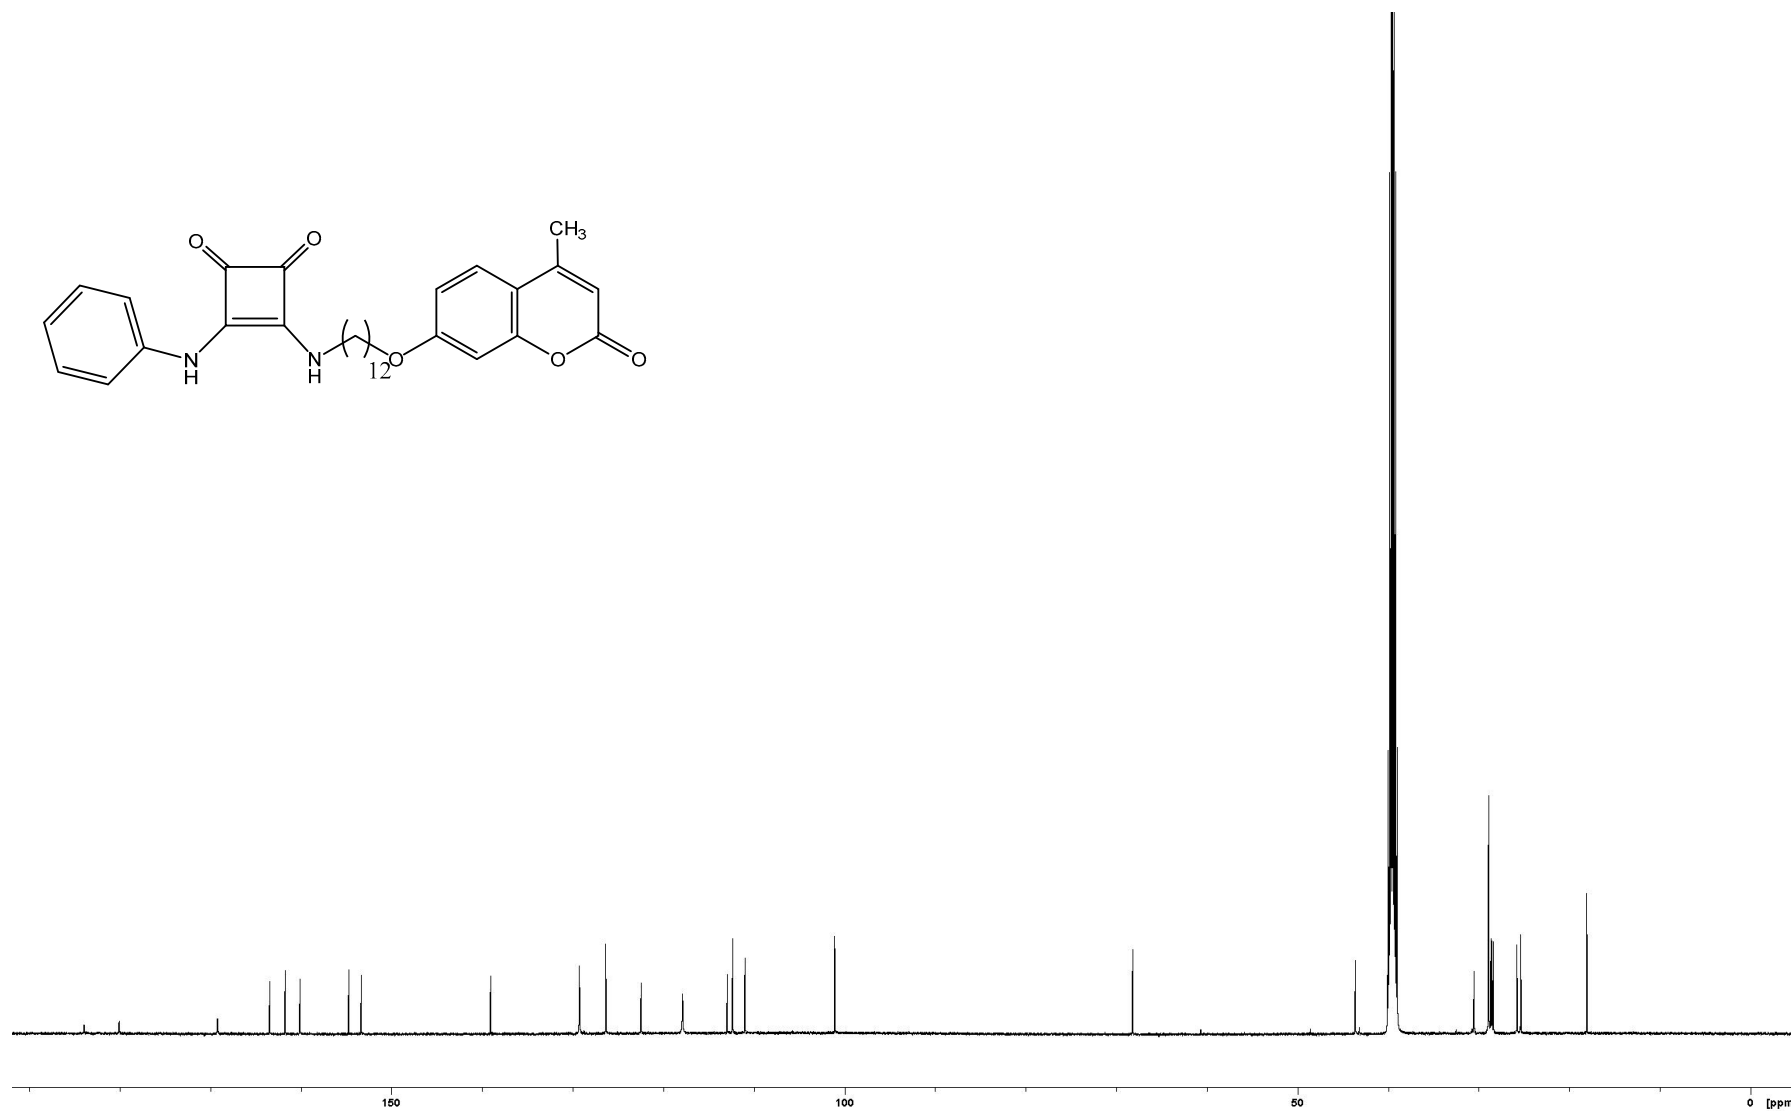

$^{13}\text{C}$ -NMR (125.7 MHz,  $(\text{CD}_3)_2\text{SO}$ ) of **16d**

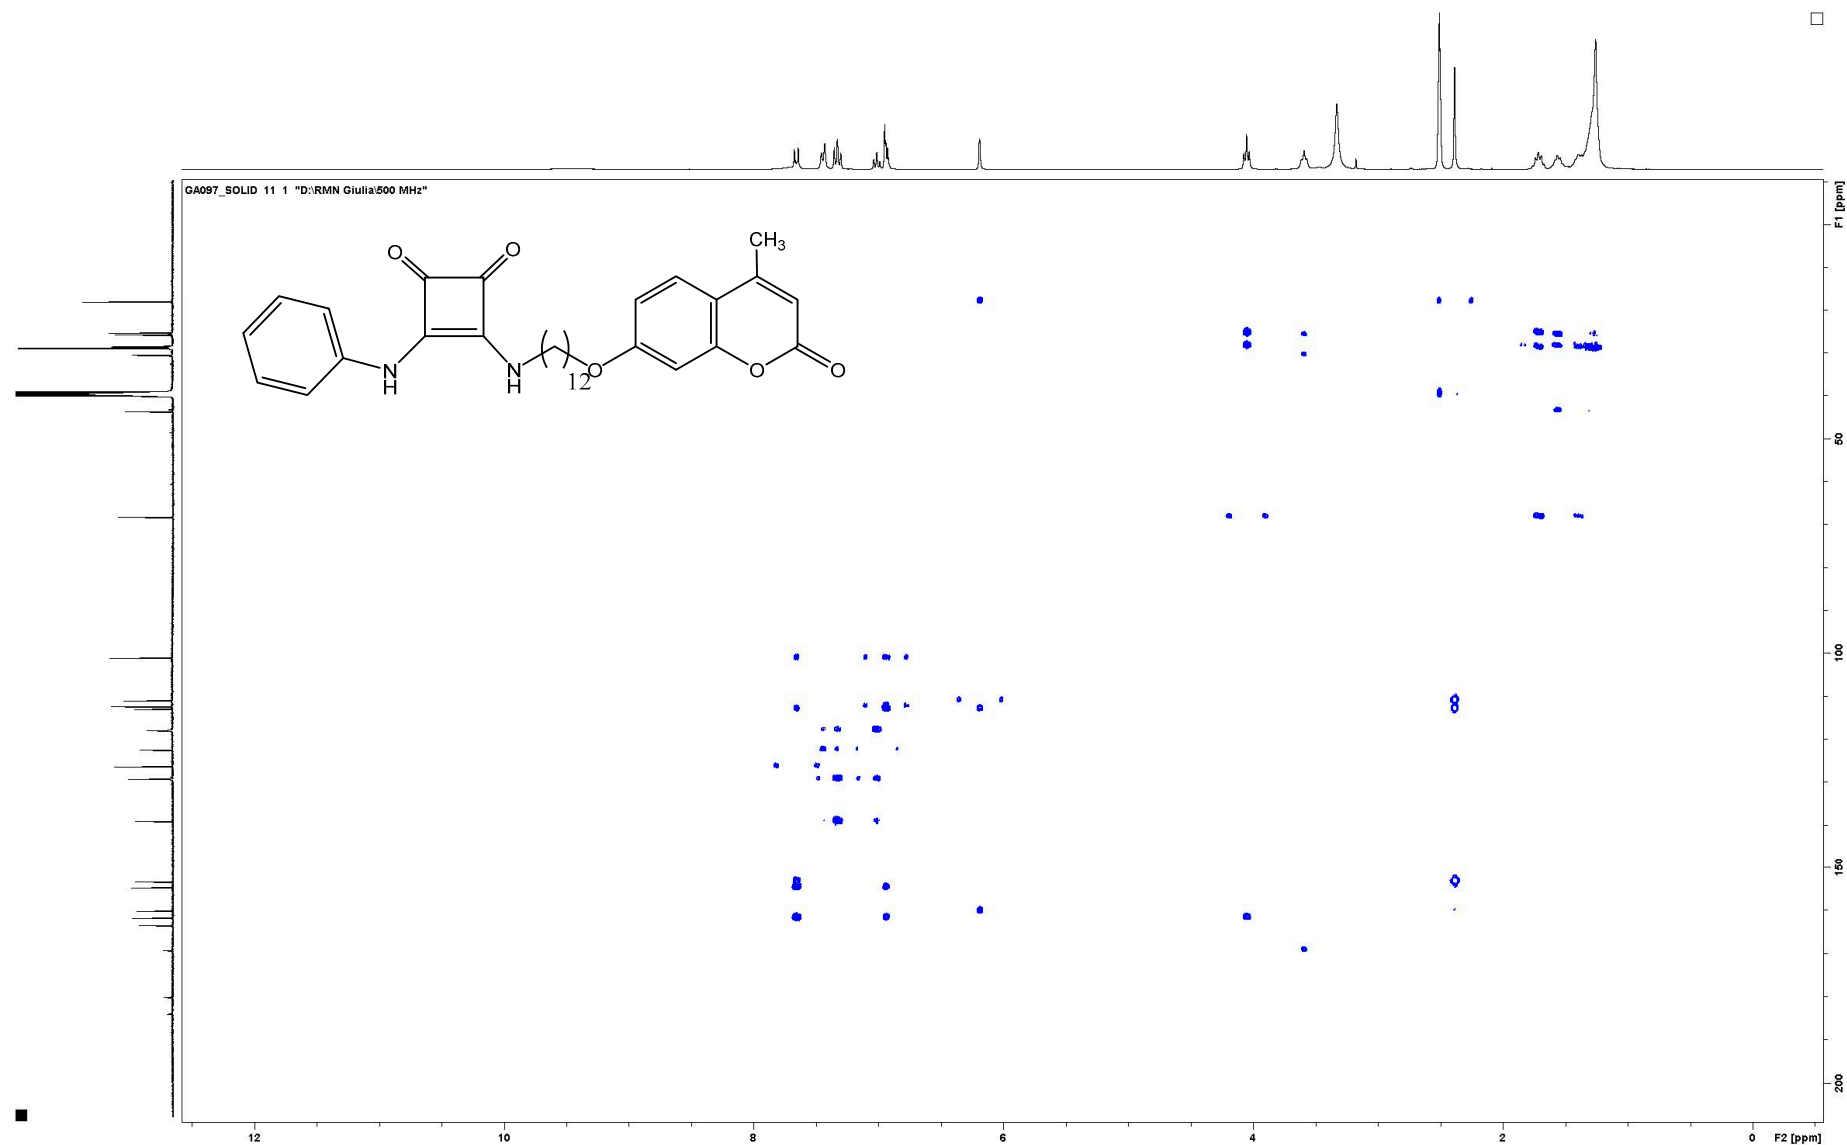

HMBC  $^1\text{H}$ - $^{13}\text{C}$  (500 MHz,  $(\text{CD}_3)_2\text{SO}$ ) of **16d**

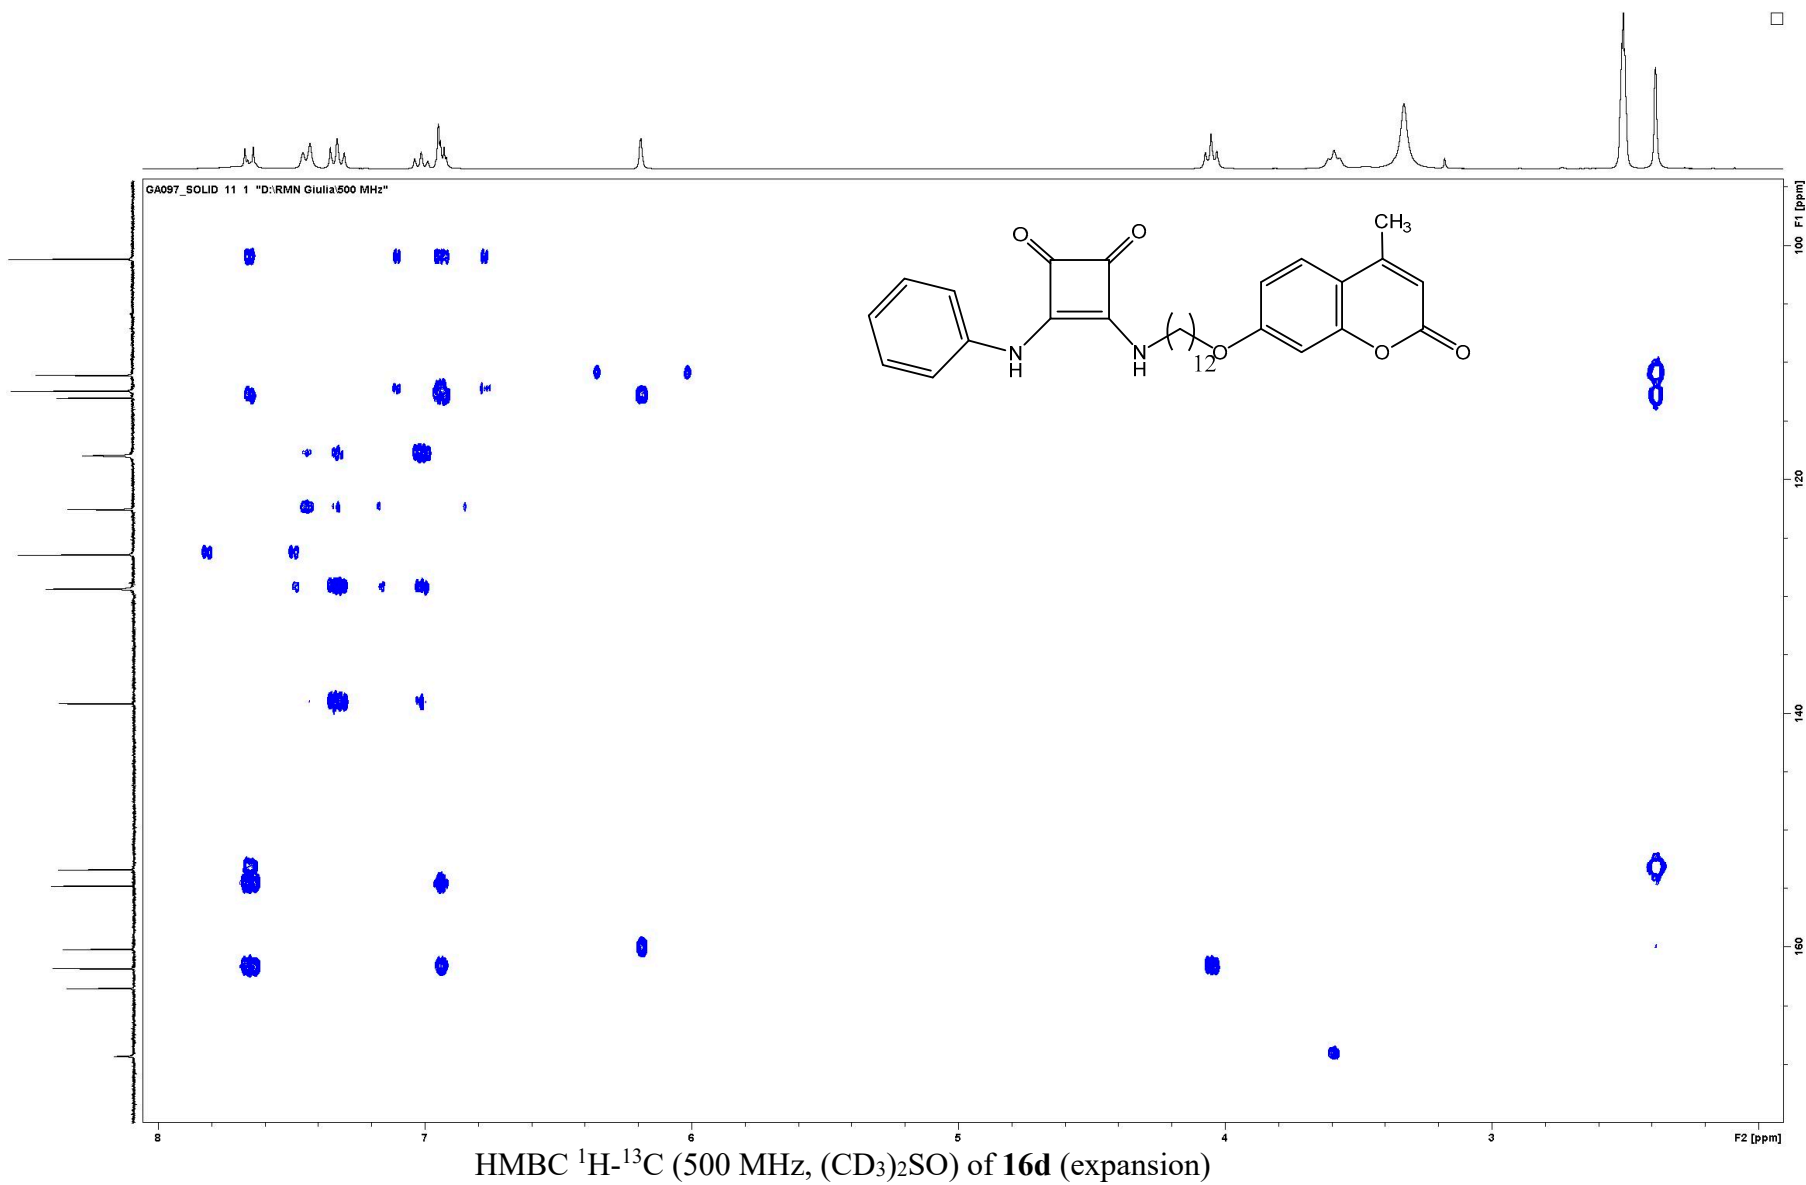

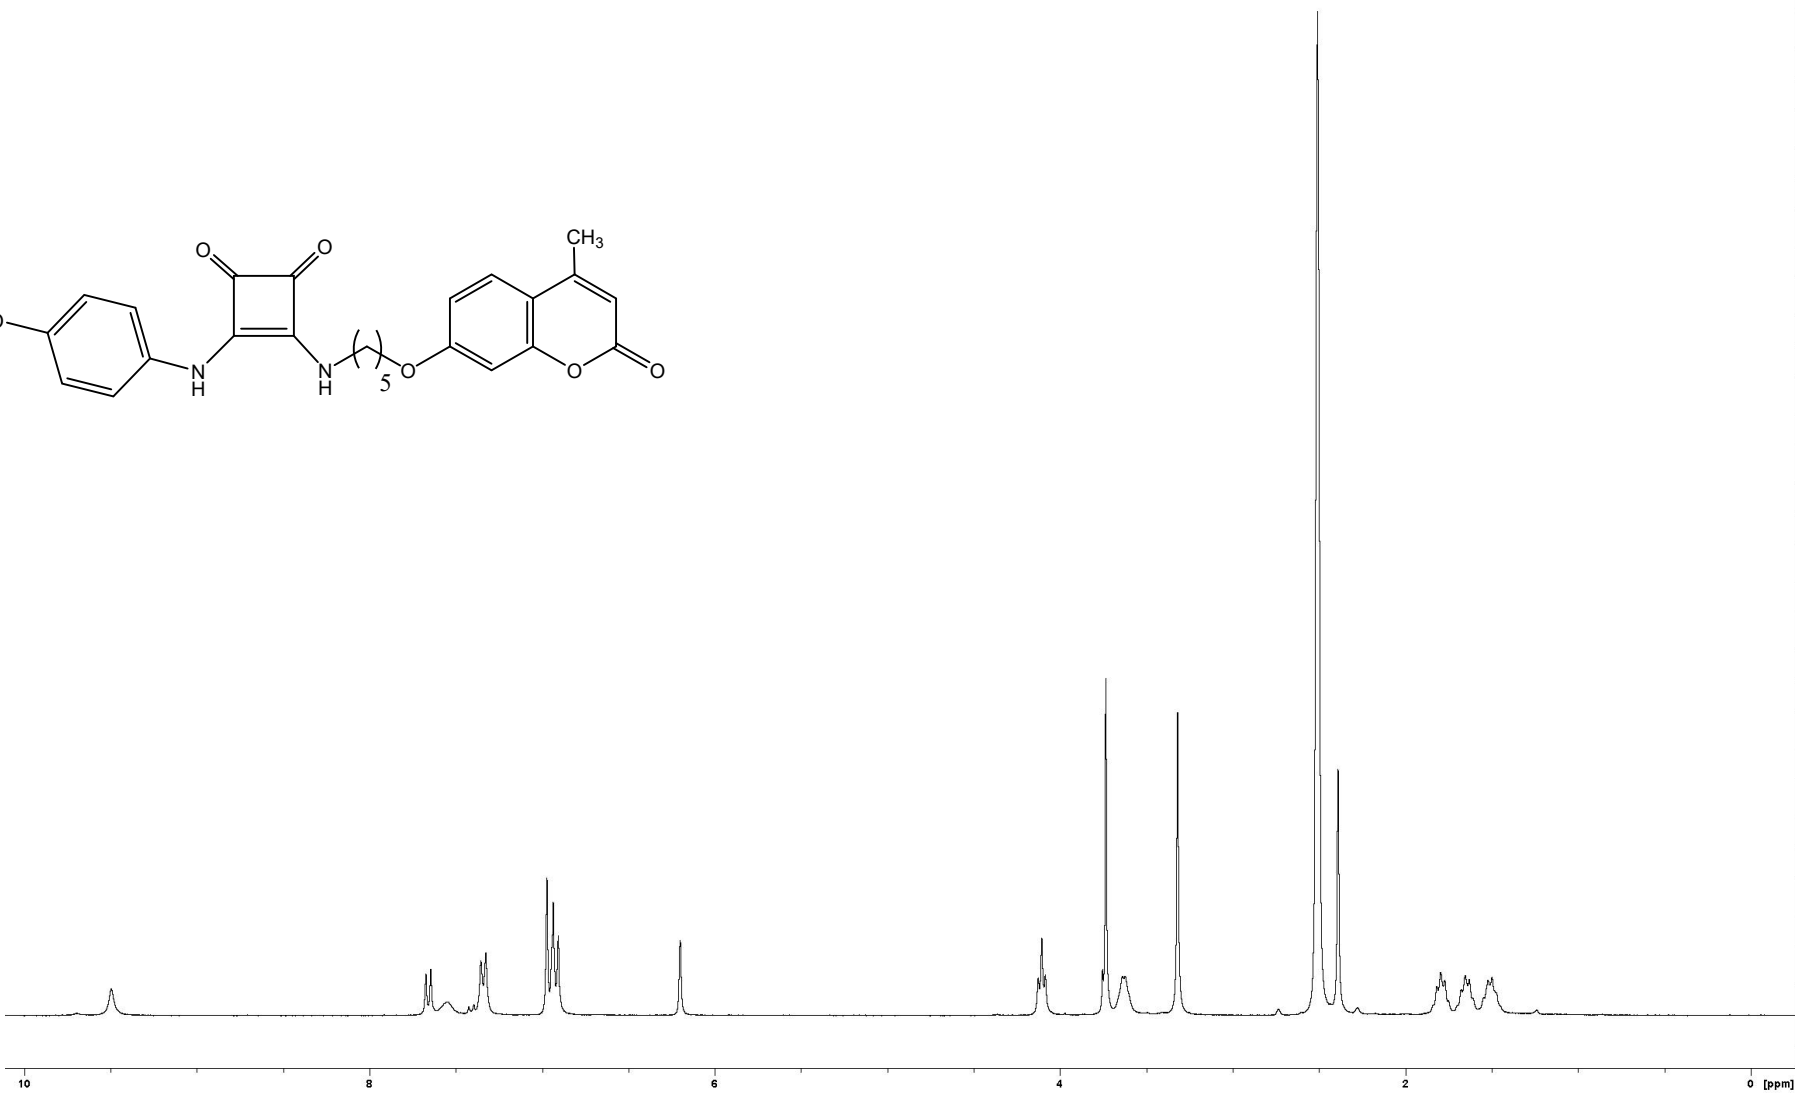

S30

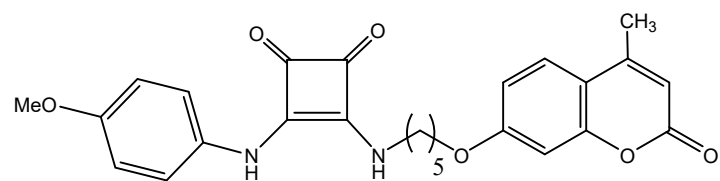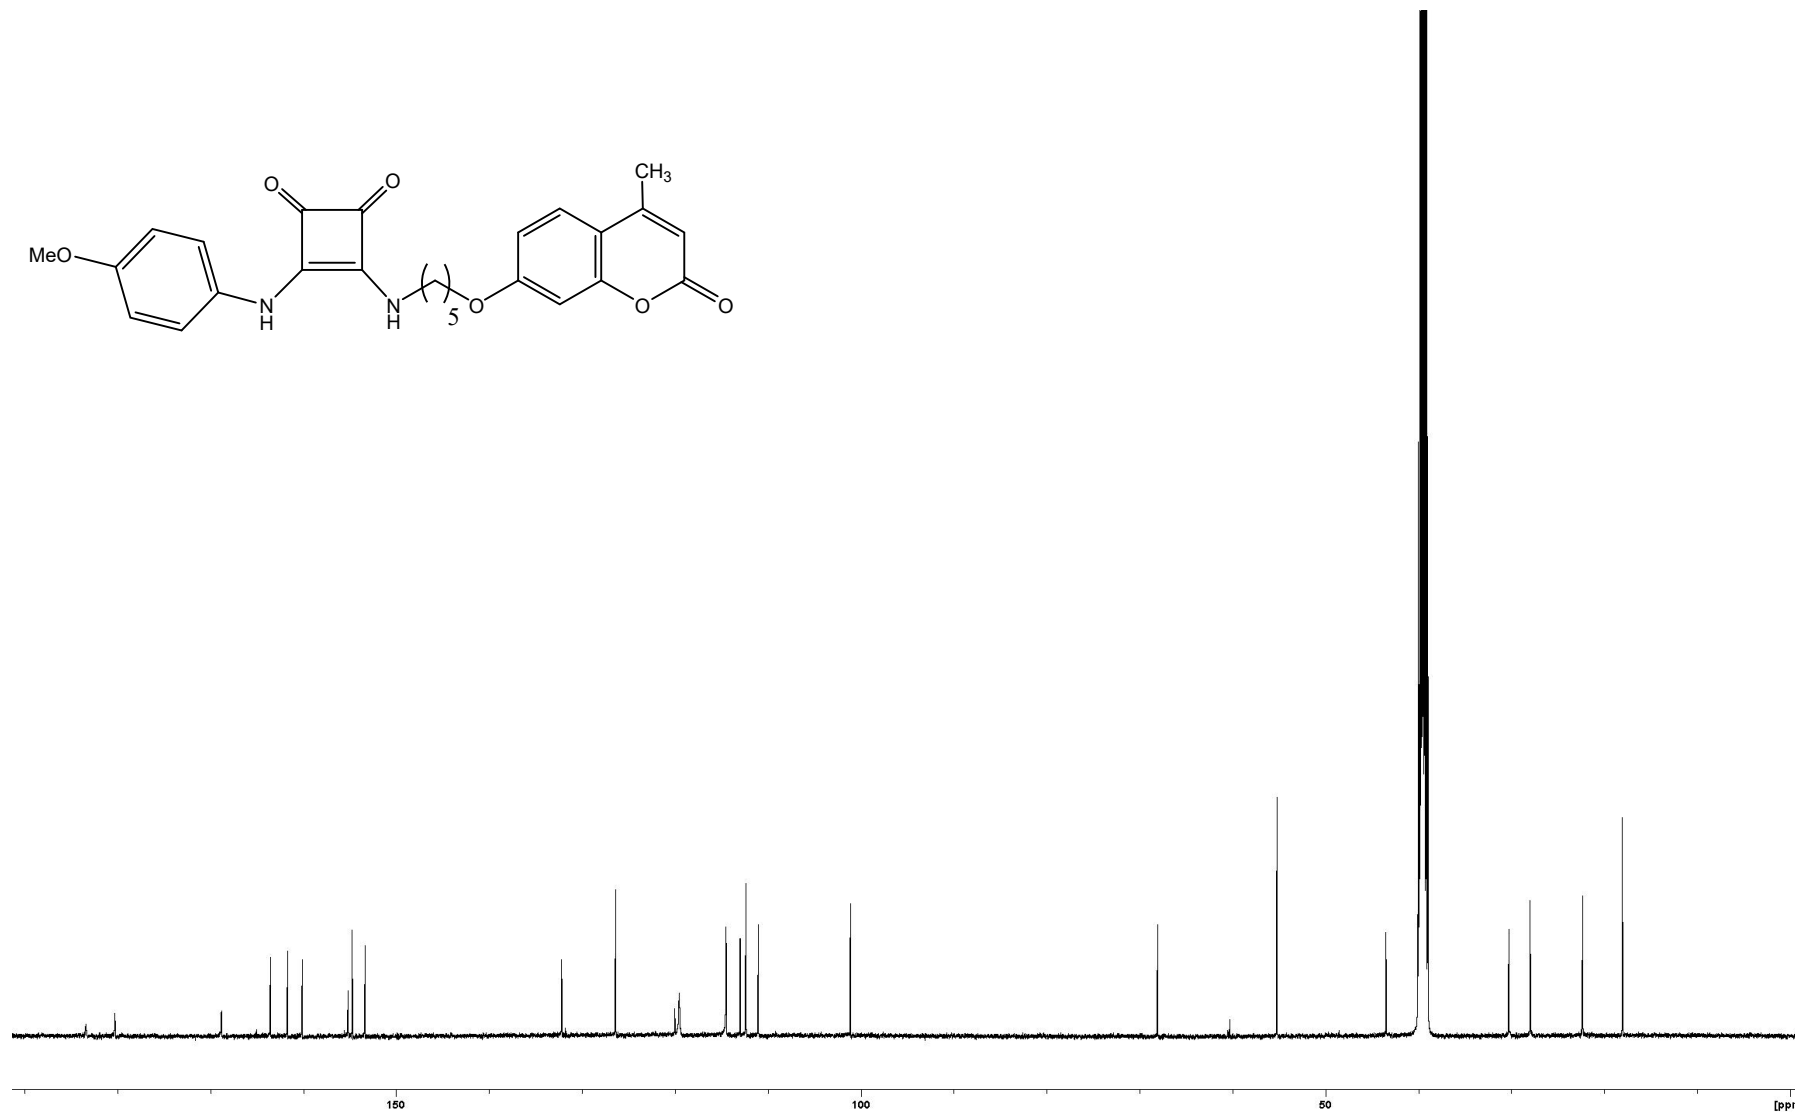

$^{13}\text{C}$ -NMR (125.7 MHz,  $(\text{CD}_3)_2\text{SO}$ ) of **16e**

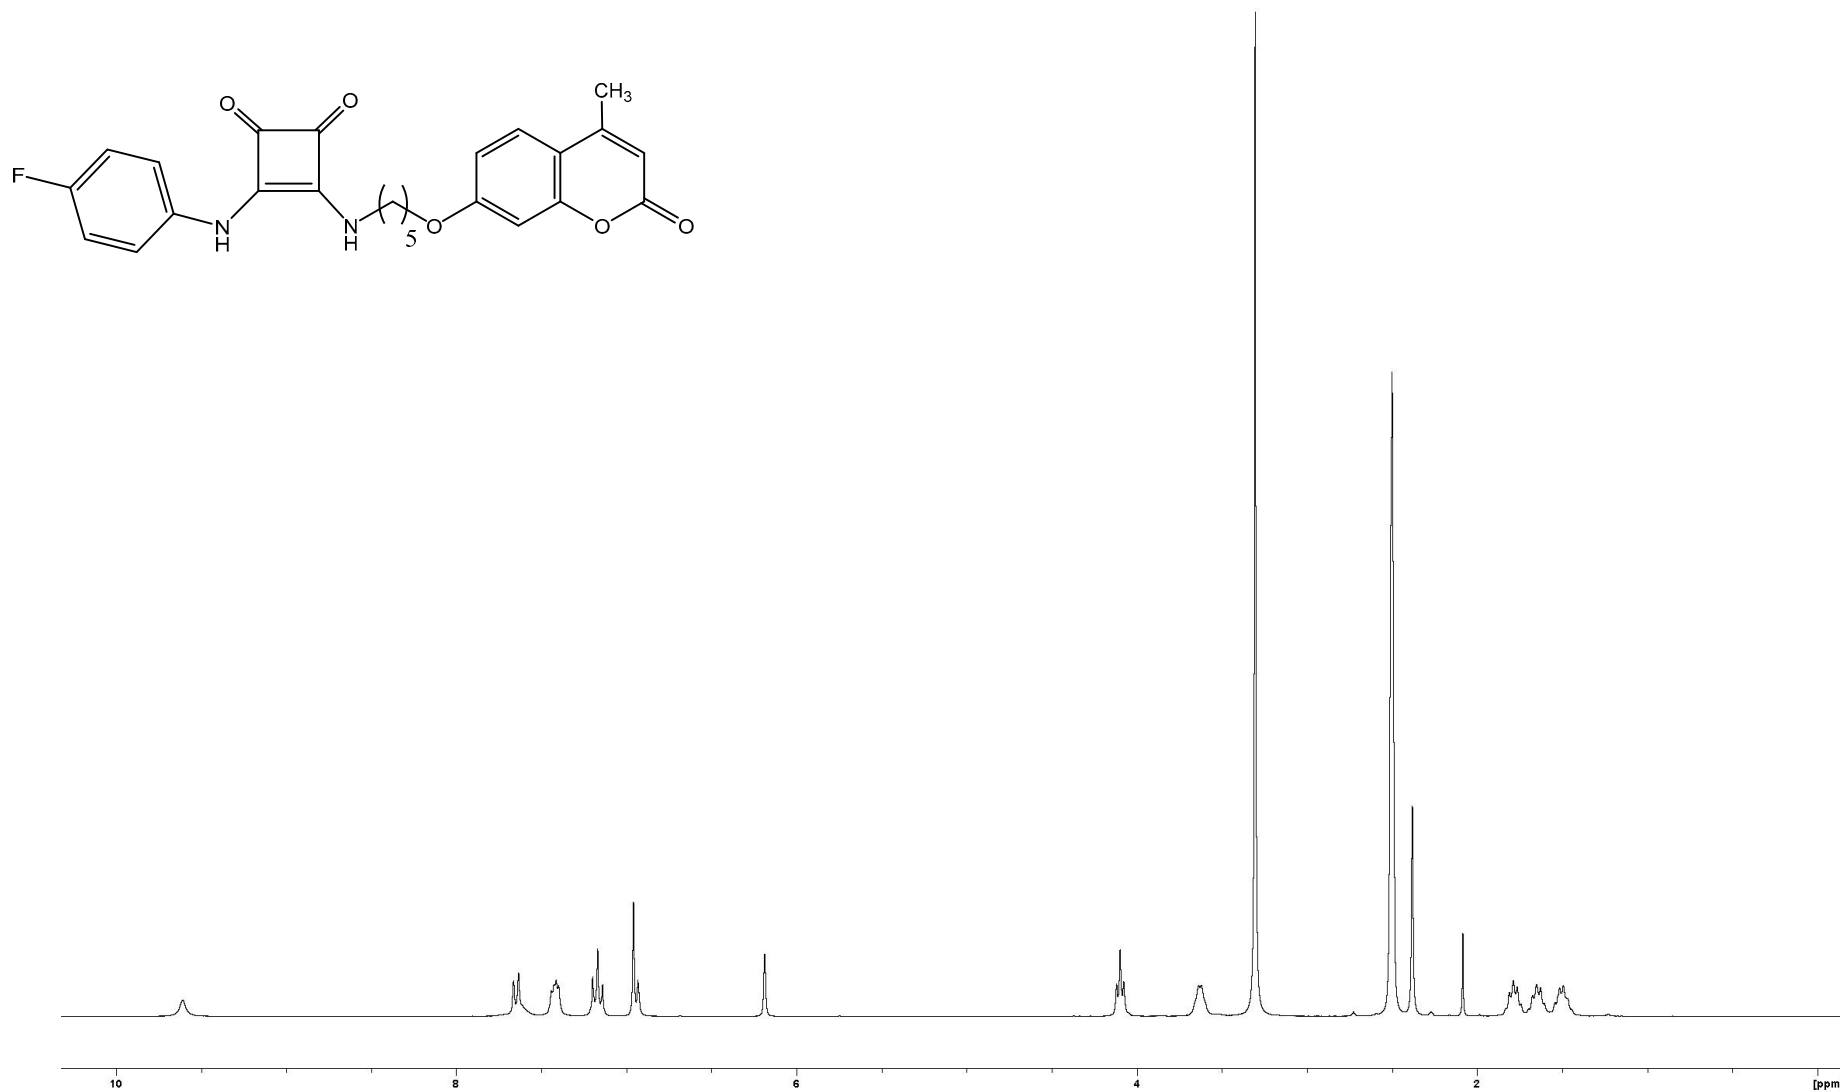

<sup>1</sup>H-NMR (300 MHz, (CD<sub>3</sub>)<sub>2</sub>SO) of **16f**



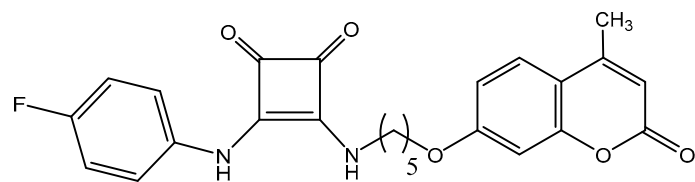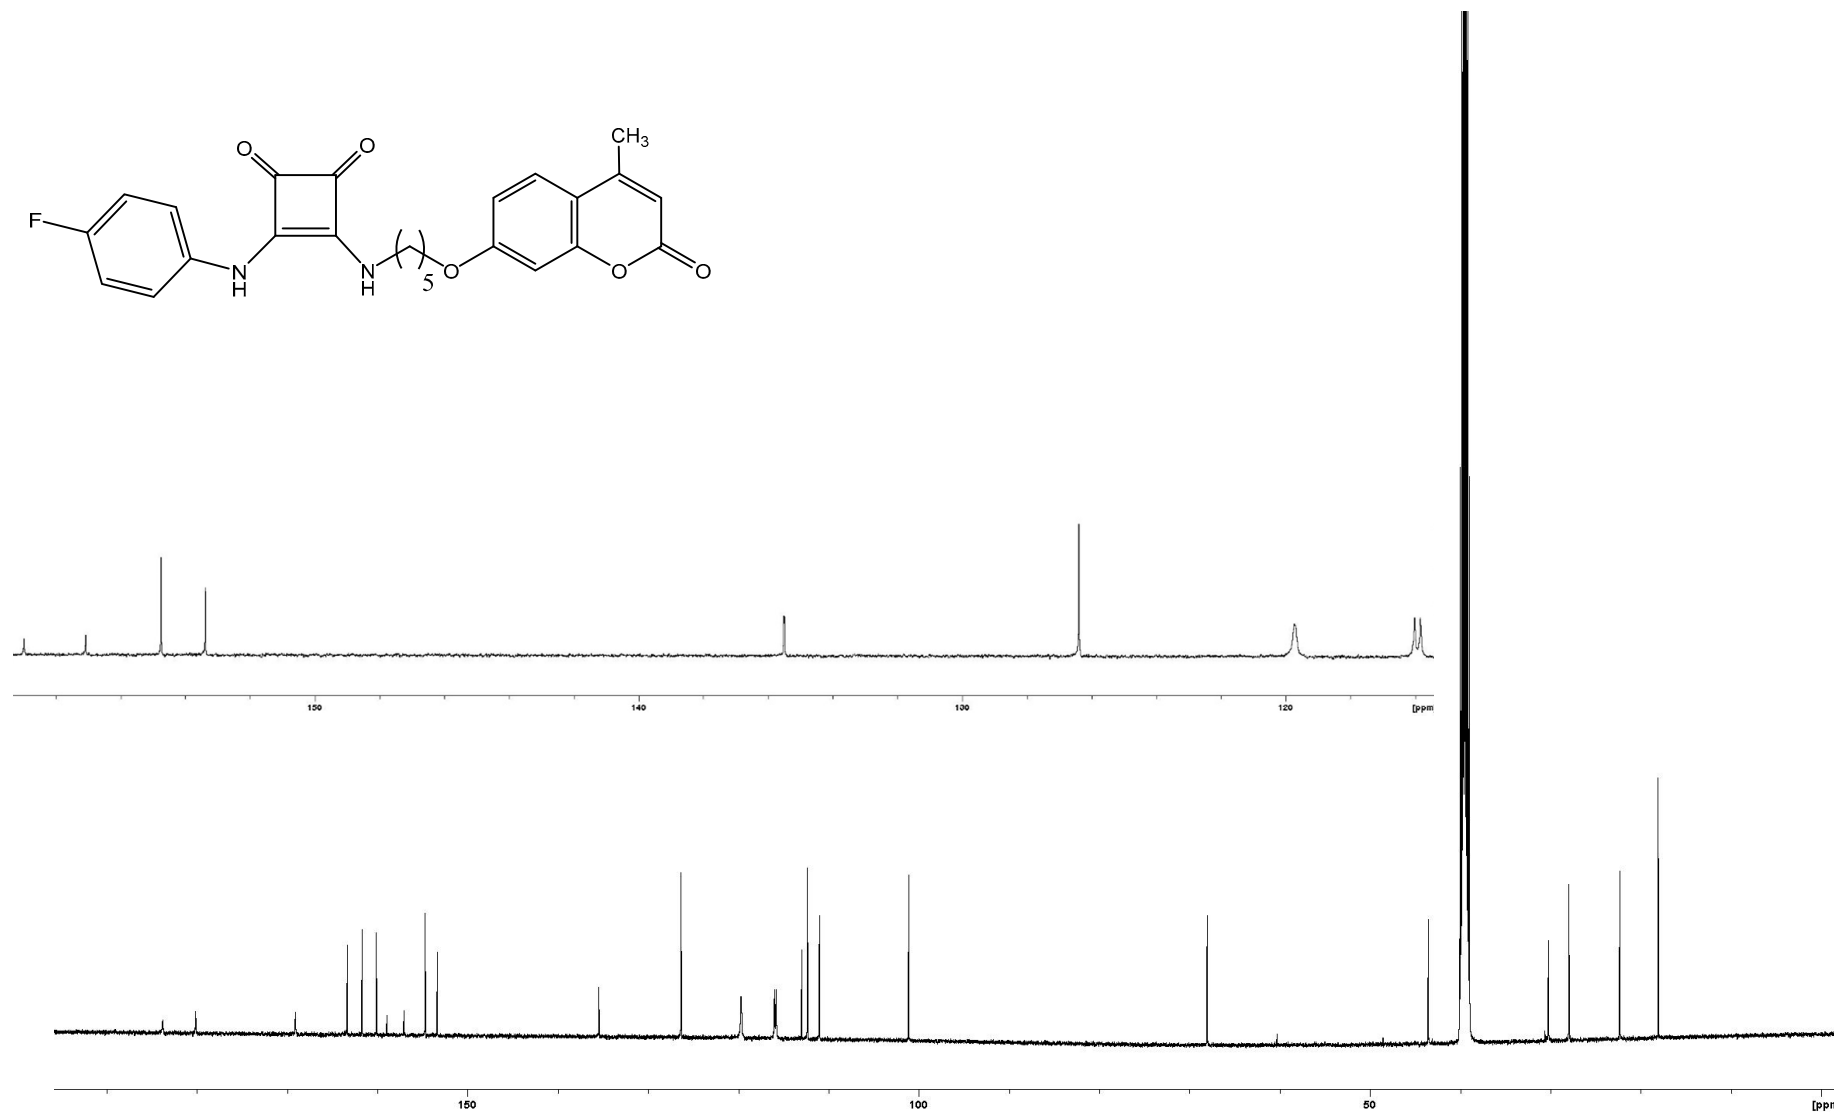

$^{13}\text{C}$ -NMR (125.7 MHz,  $(\text{CD}_3)_2\text{SO}$ ) of **16f**

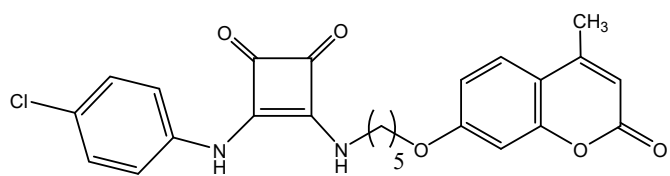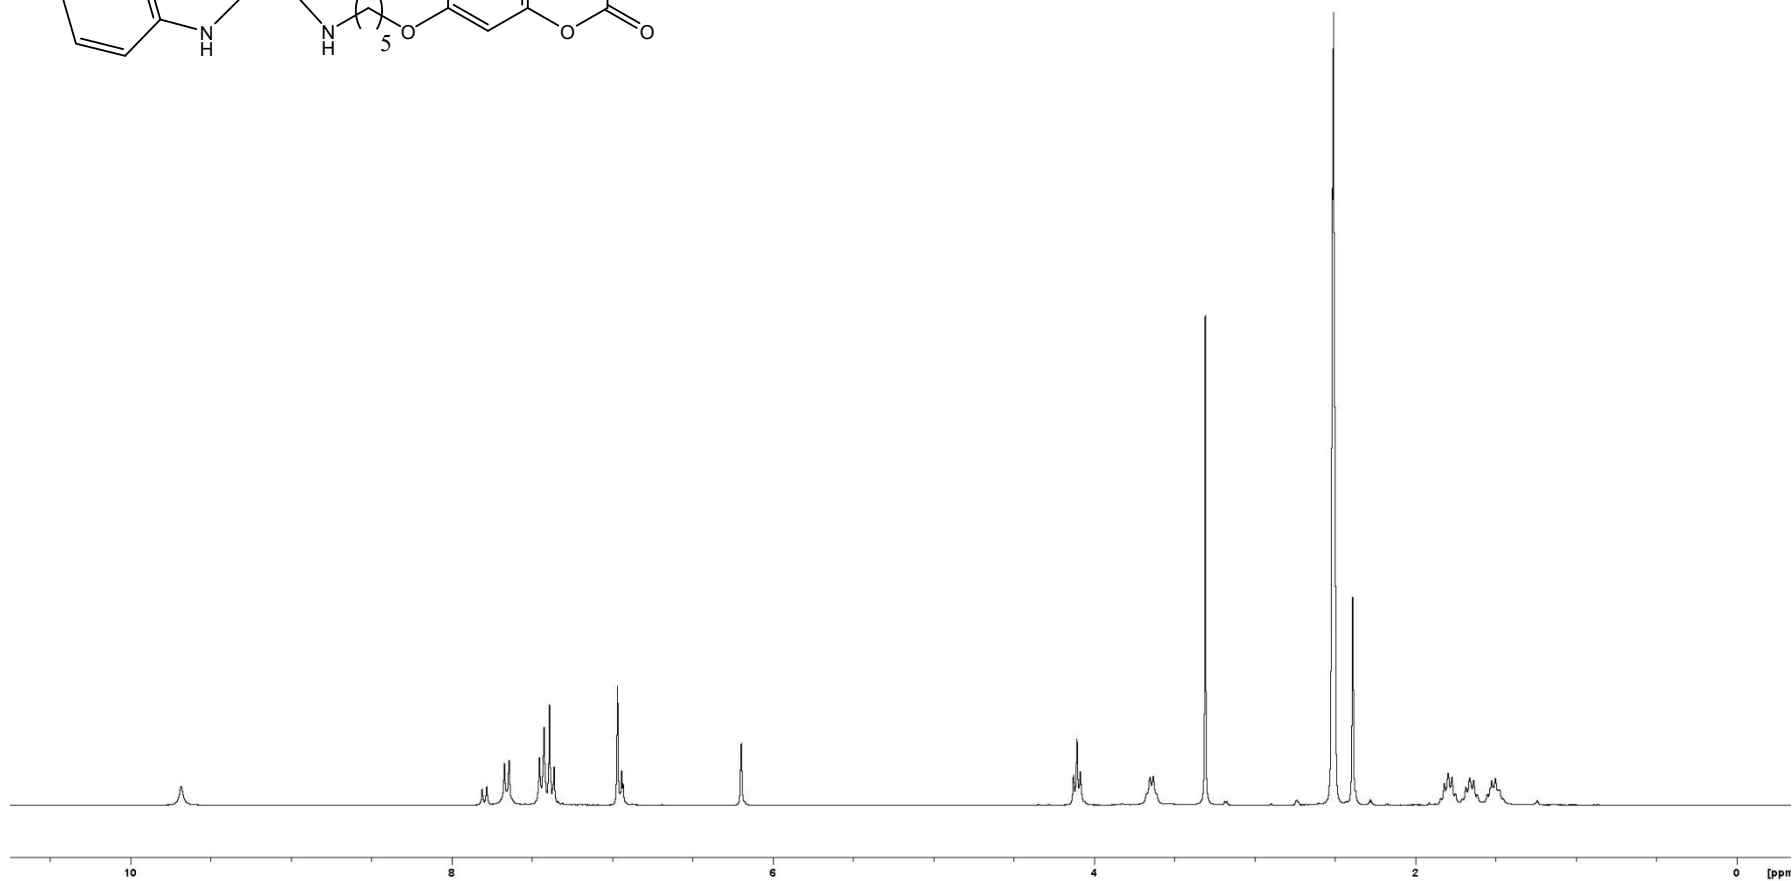

<sup>1</sup>H-NMR (300 MHz, (CD<sub>3</sub>)<sub>2</sub>SO) of **16g**

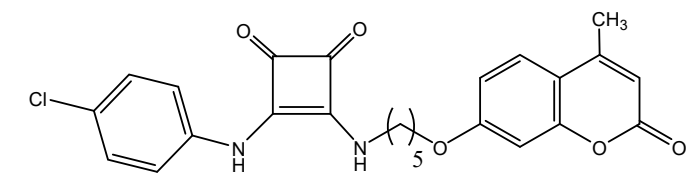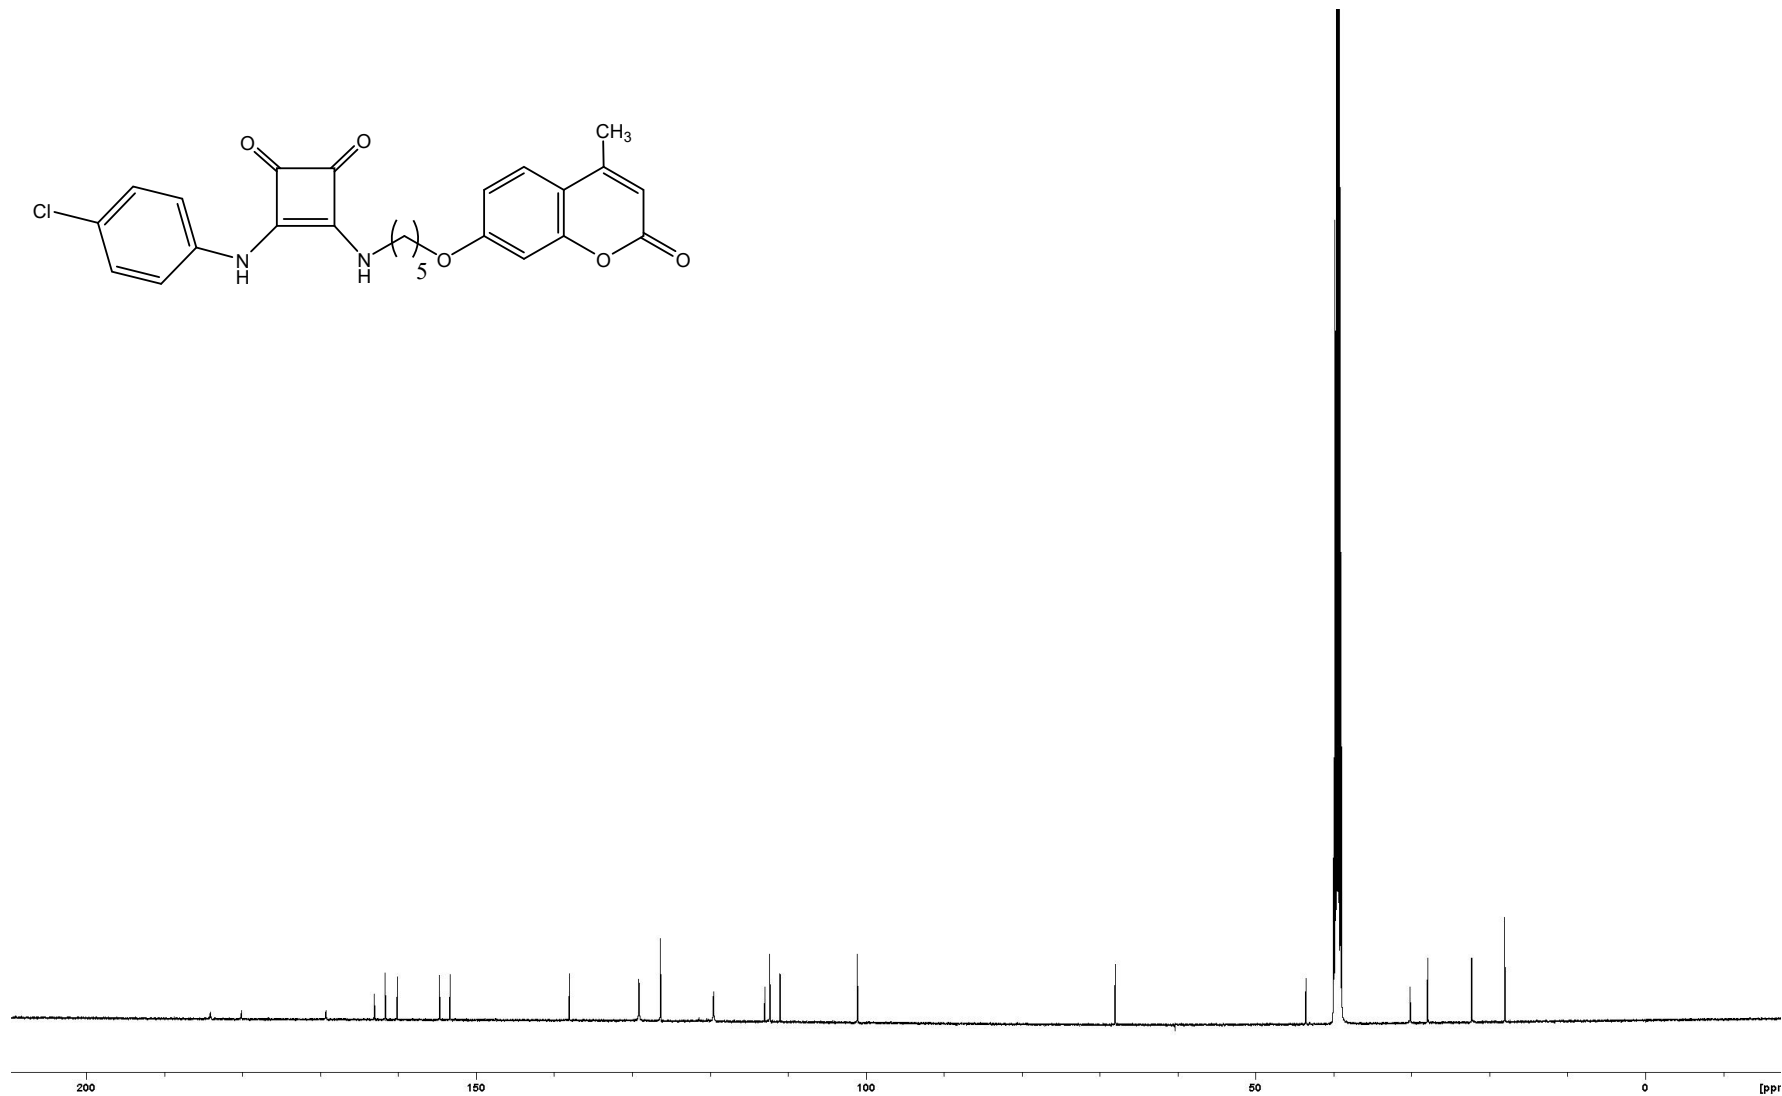

$^{13}\text{C}$ -NMR (125.7 MHz,  $(\text{CD}_3)_2\text{SO}$ ) of **16g**

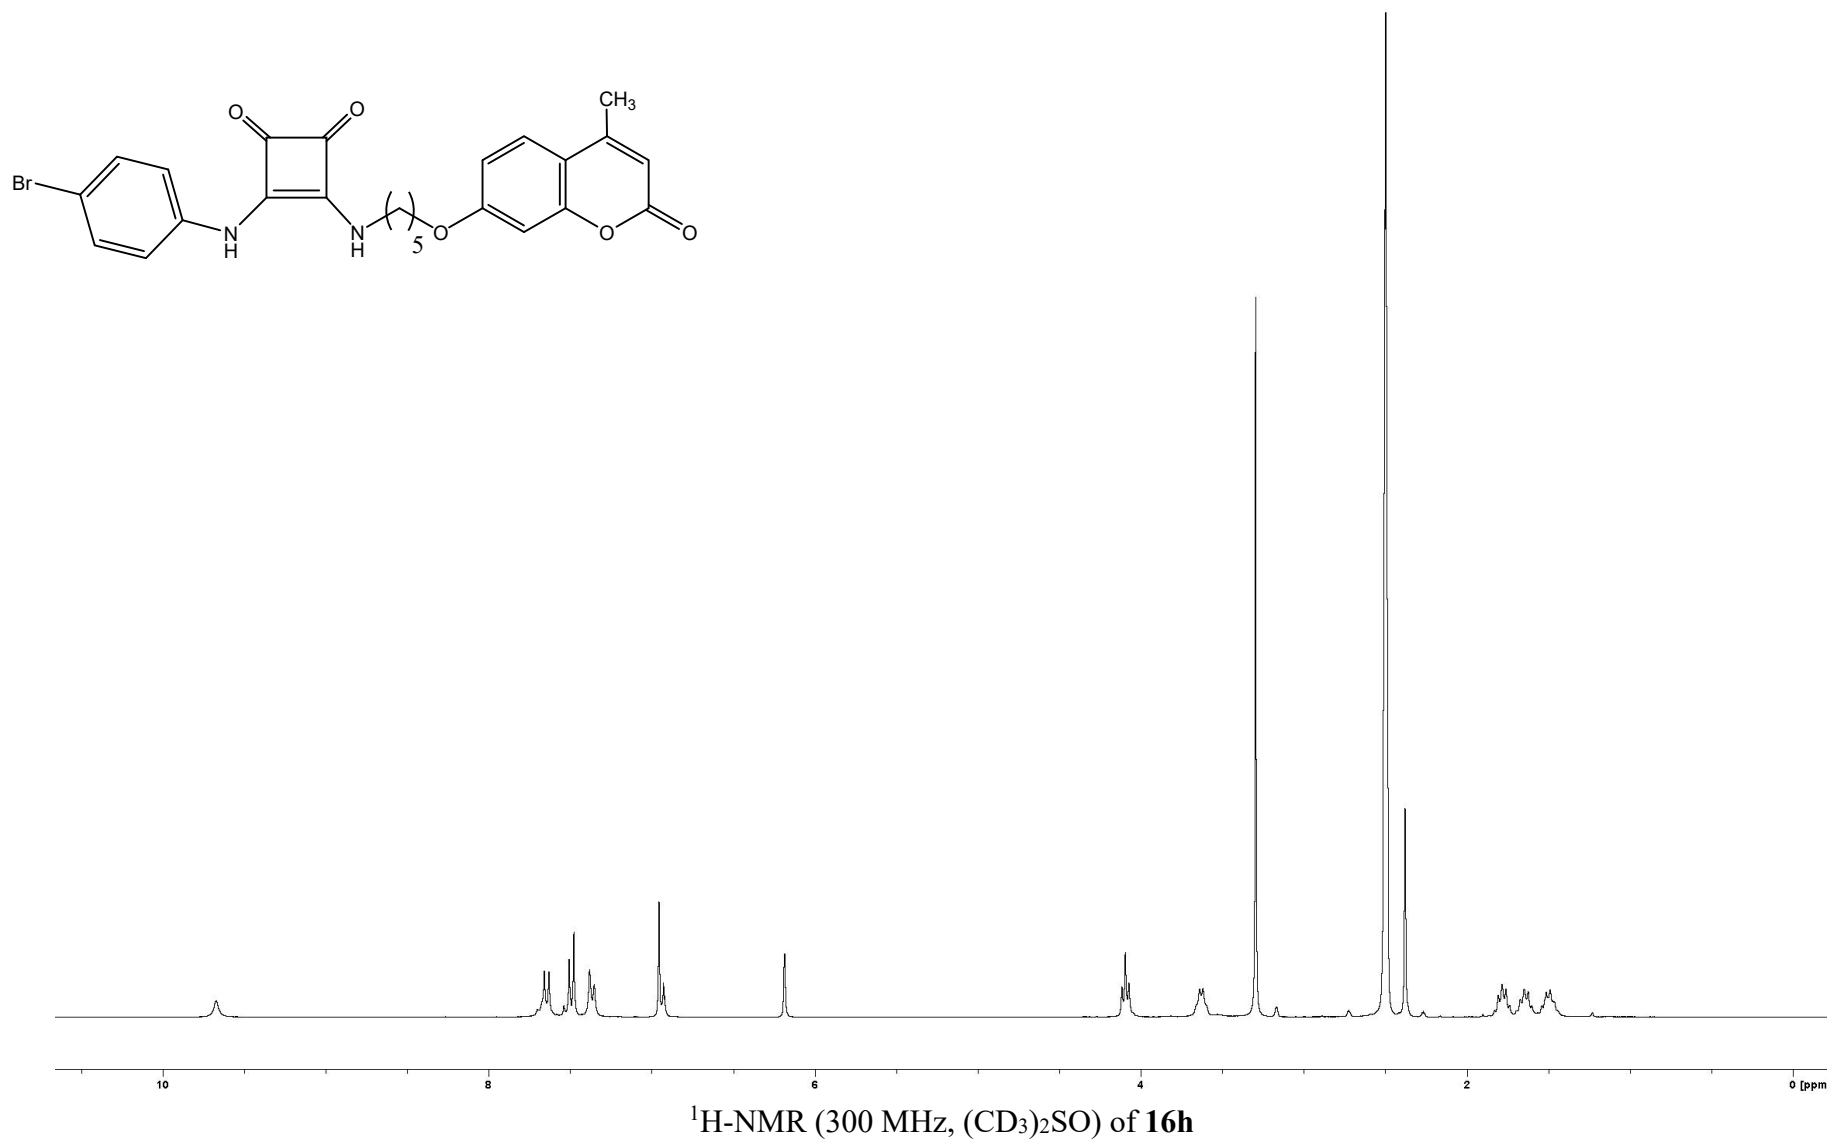

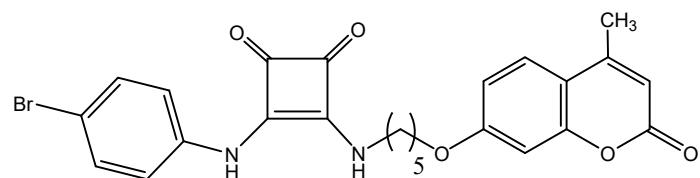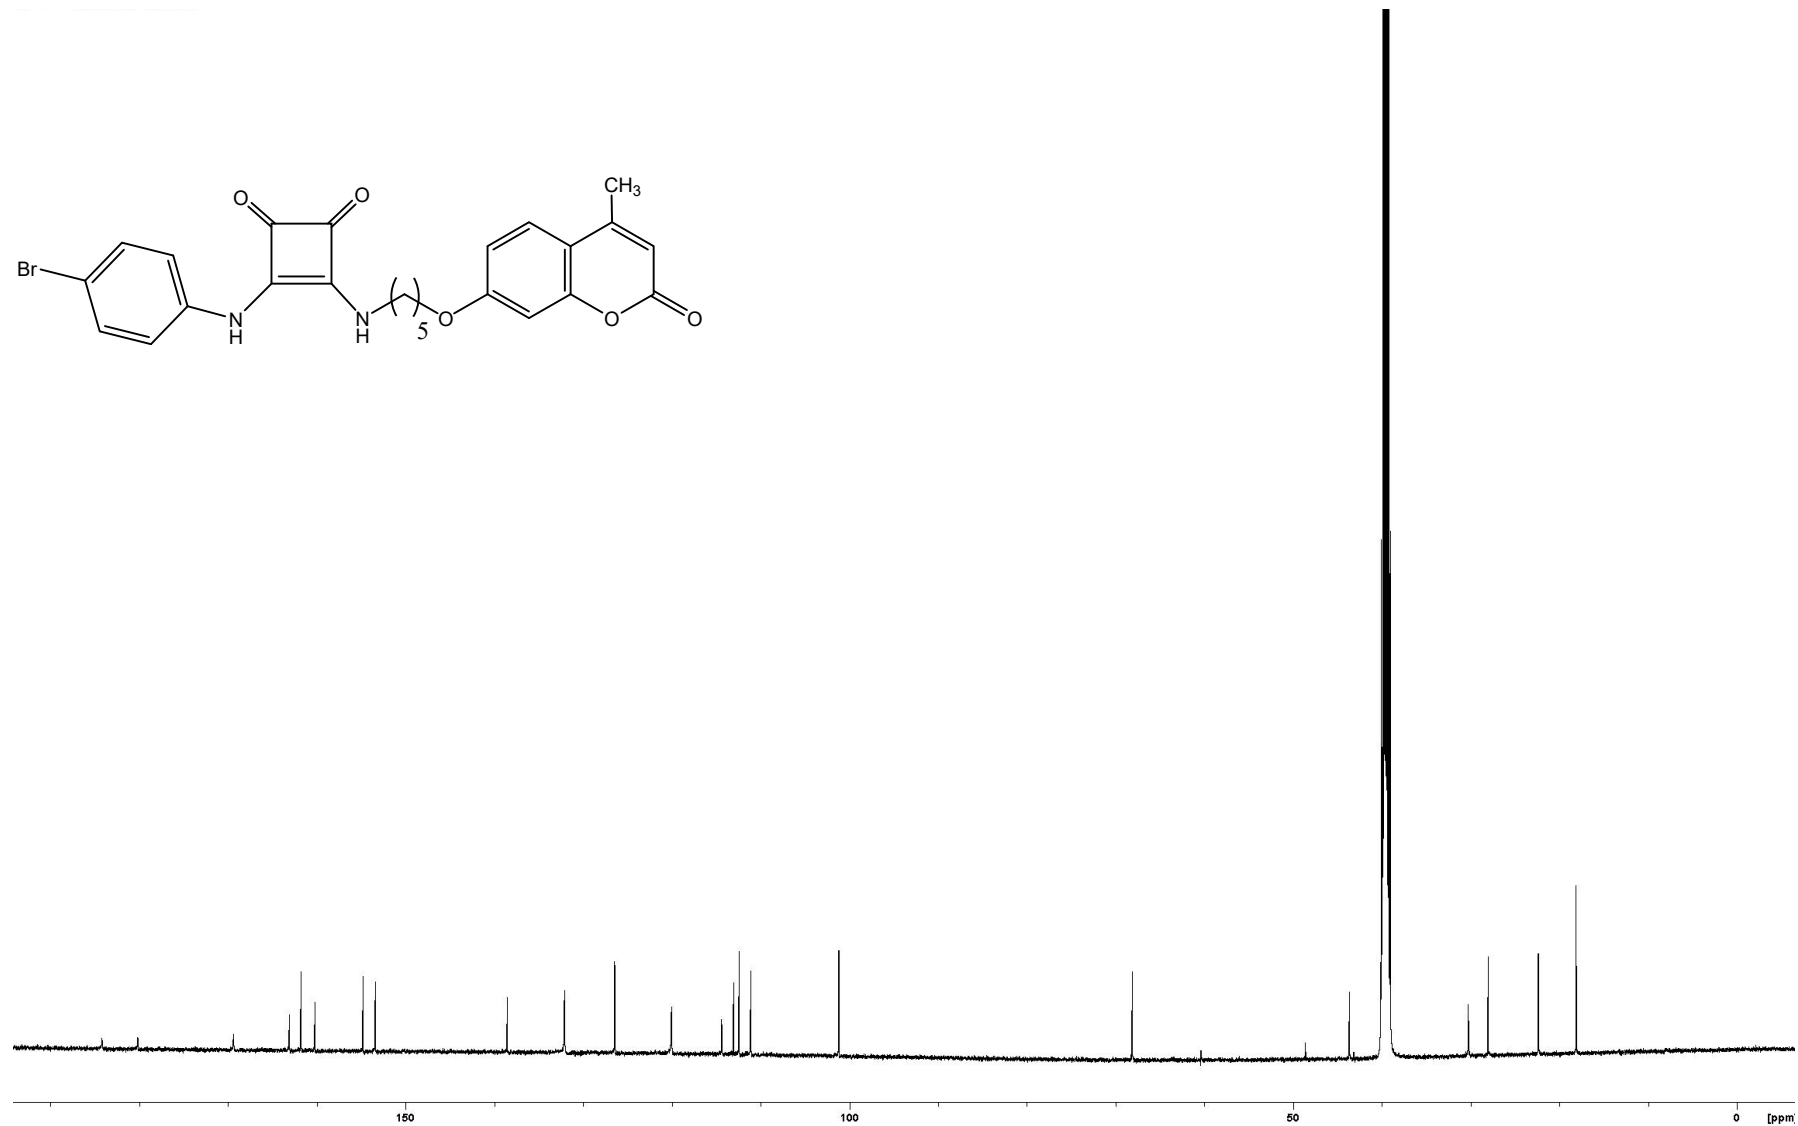

$^{13}\text{C}$ -NMR (125.7 MHz,  $(\text{CD}_3)_2\text{SO}$ ) of **16h**

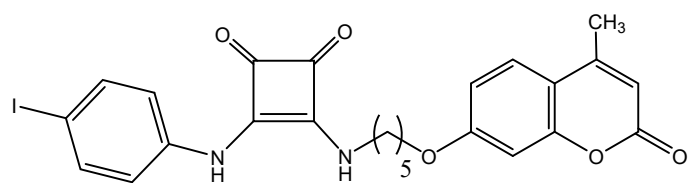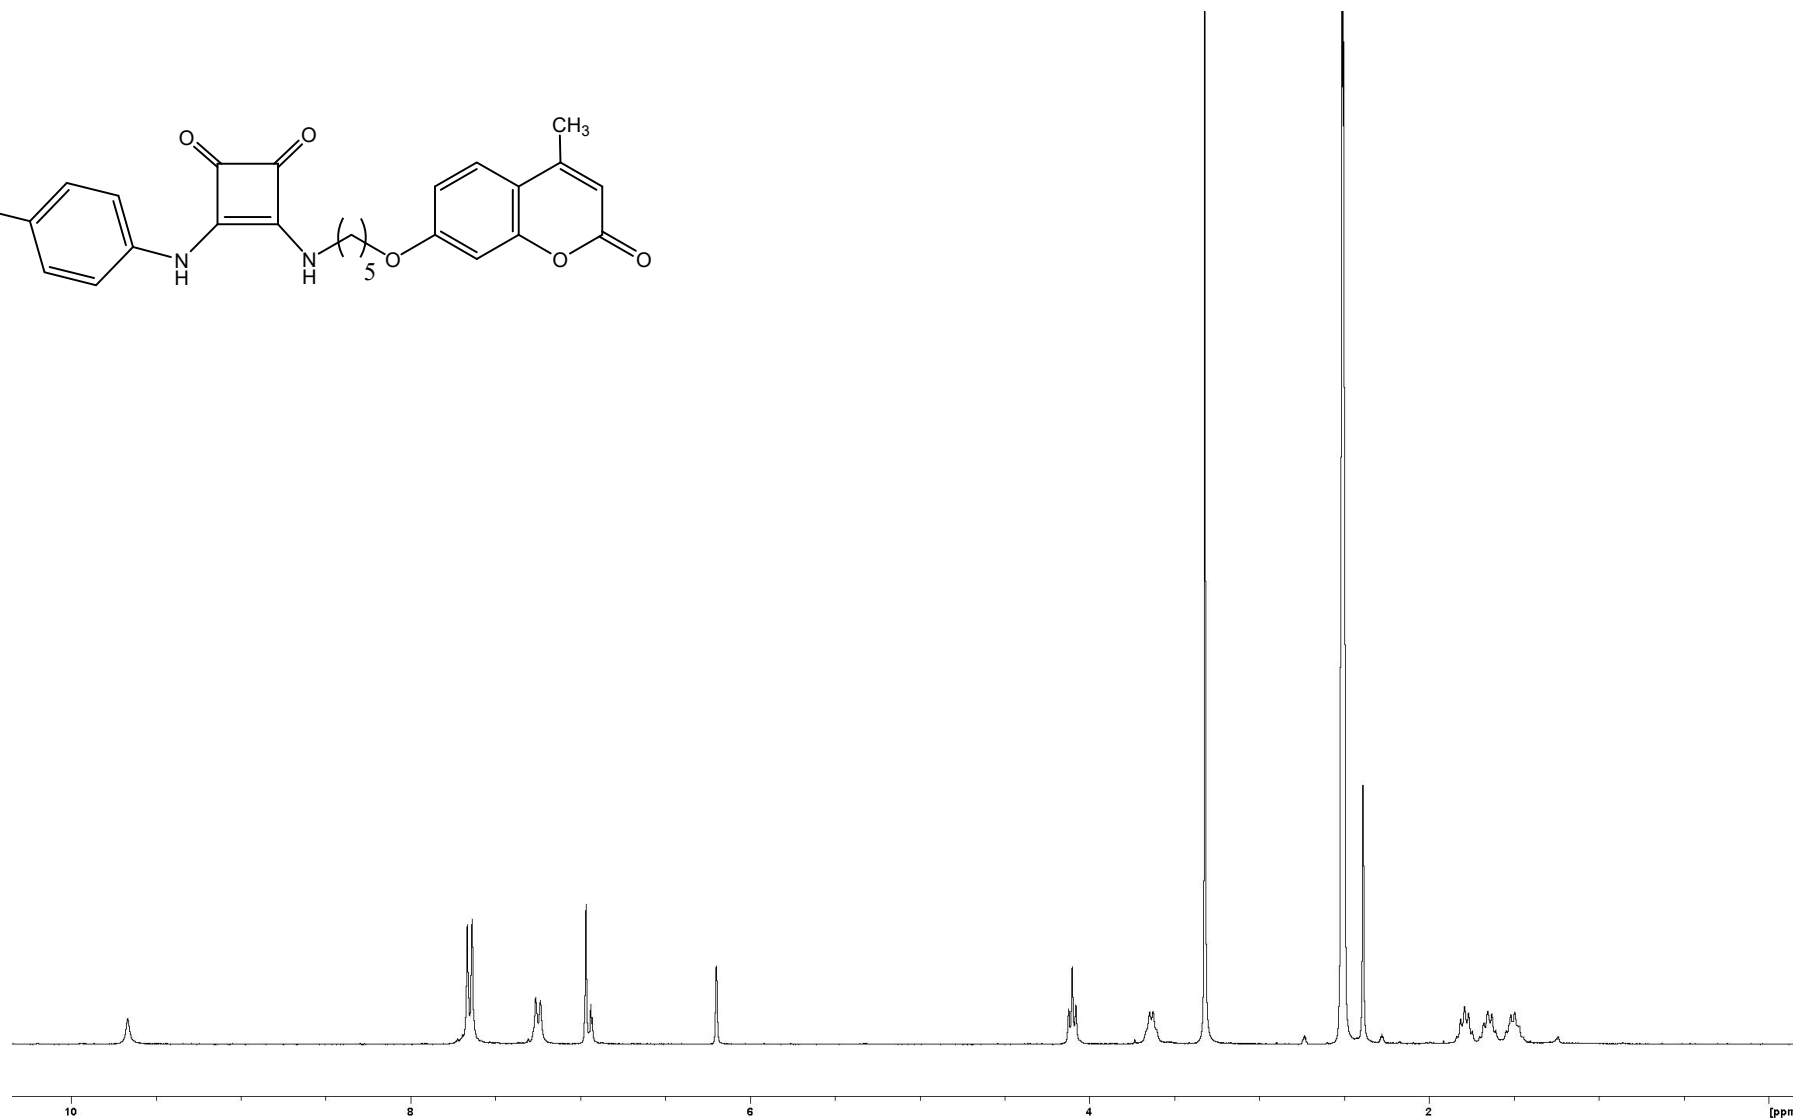

$^1\text{H-NMR}$  (300 MHz,  $(\text{CD}_3)_2\text{SO}$ ) of **16i**

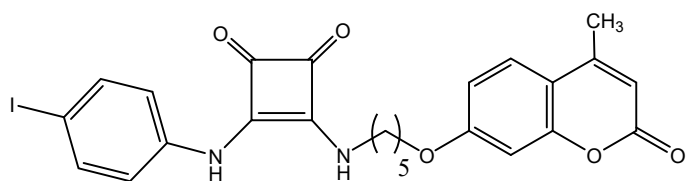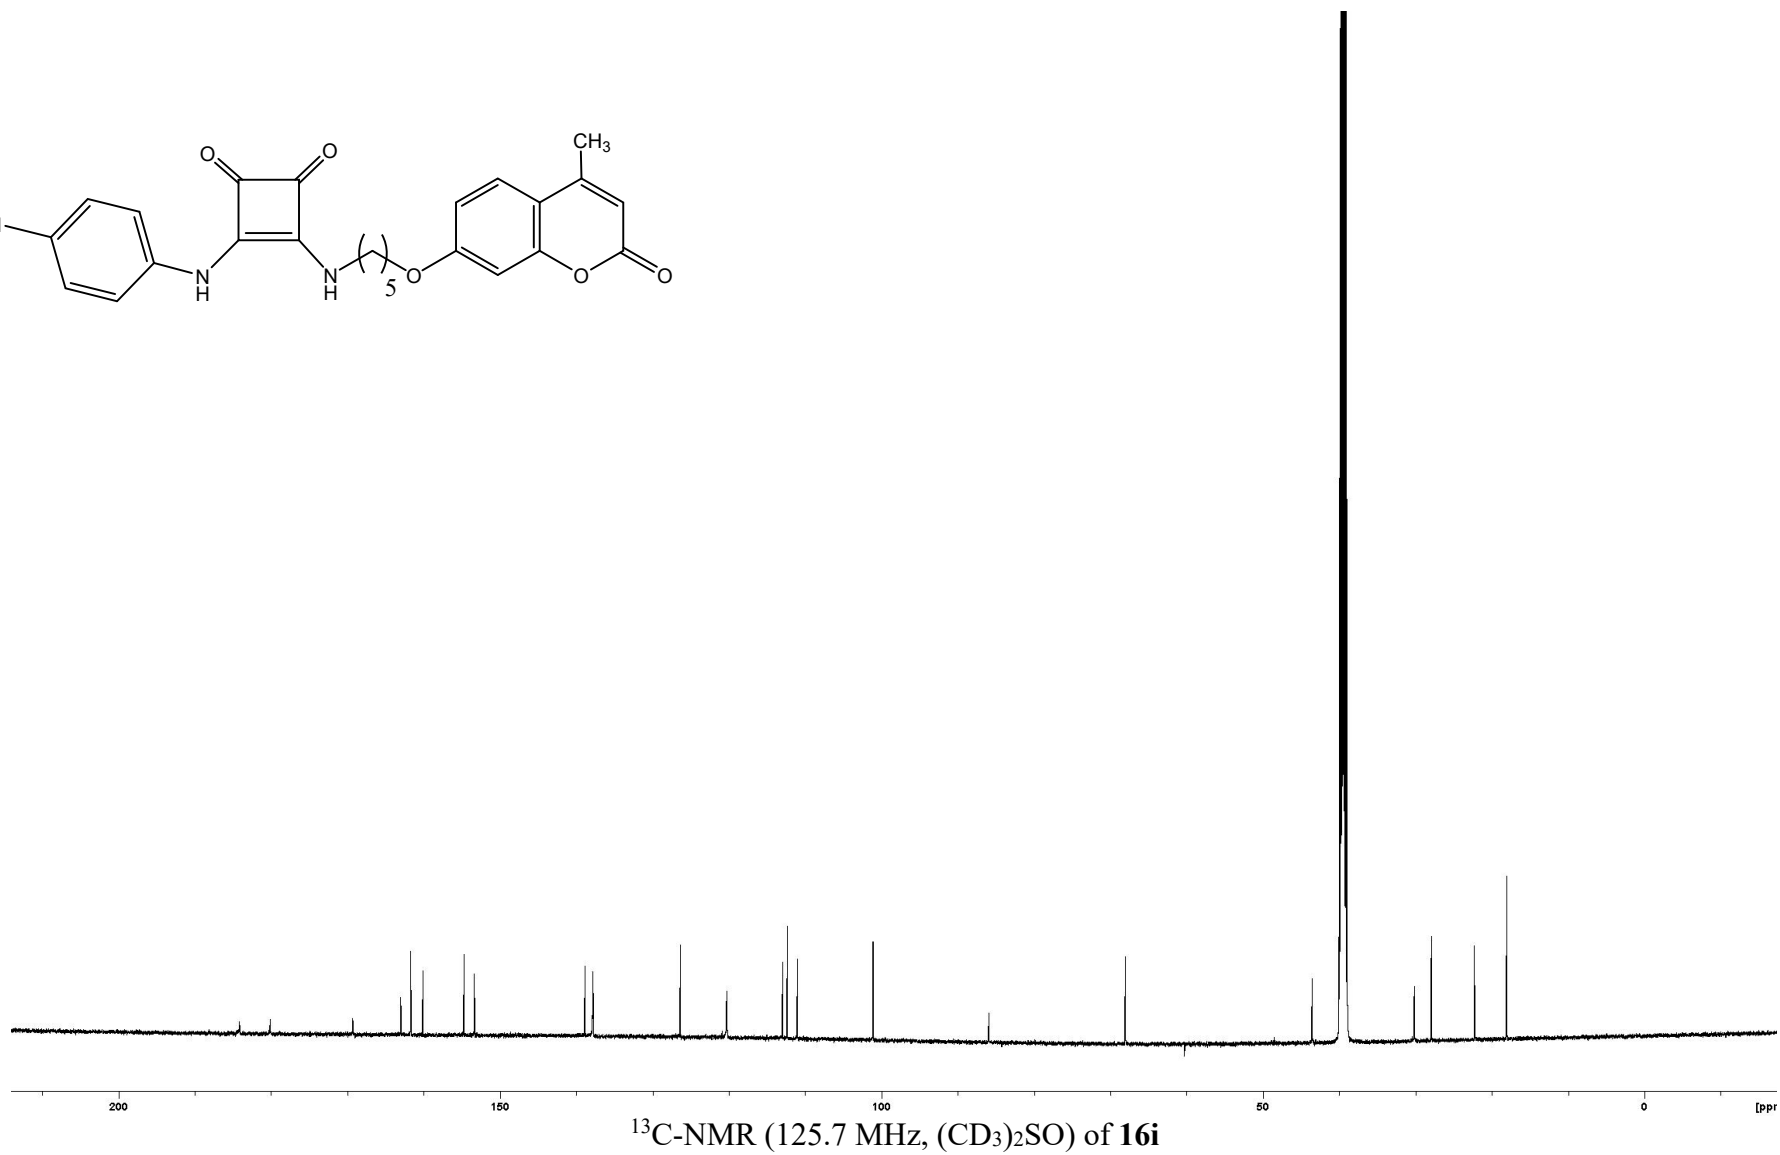

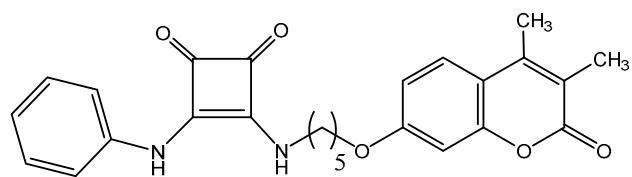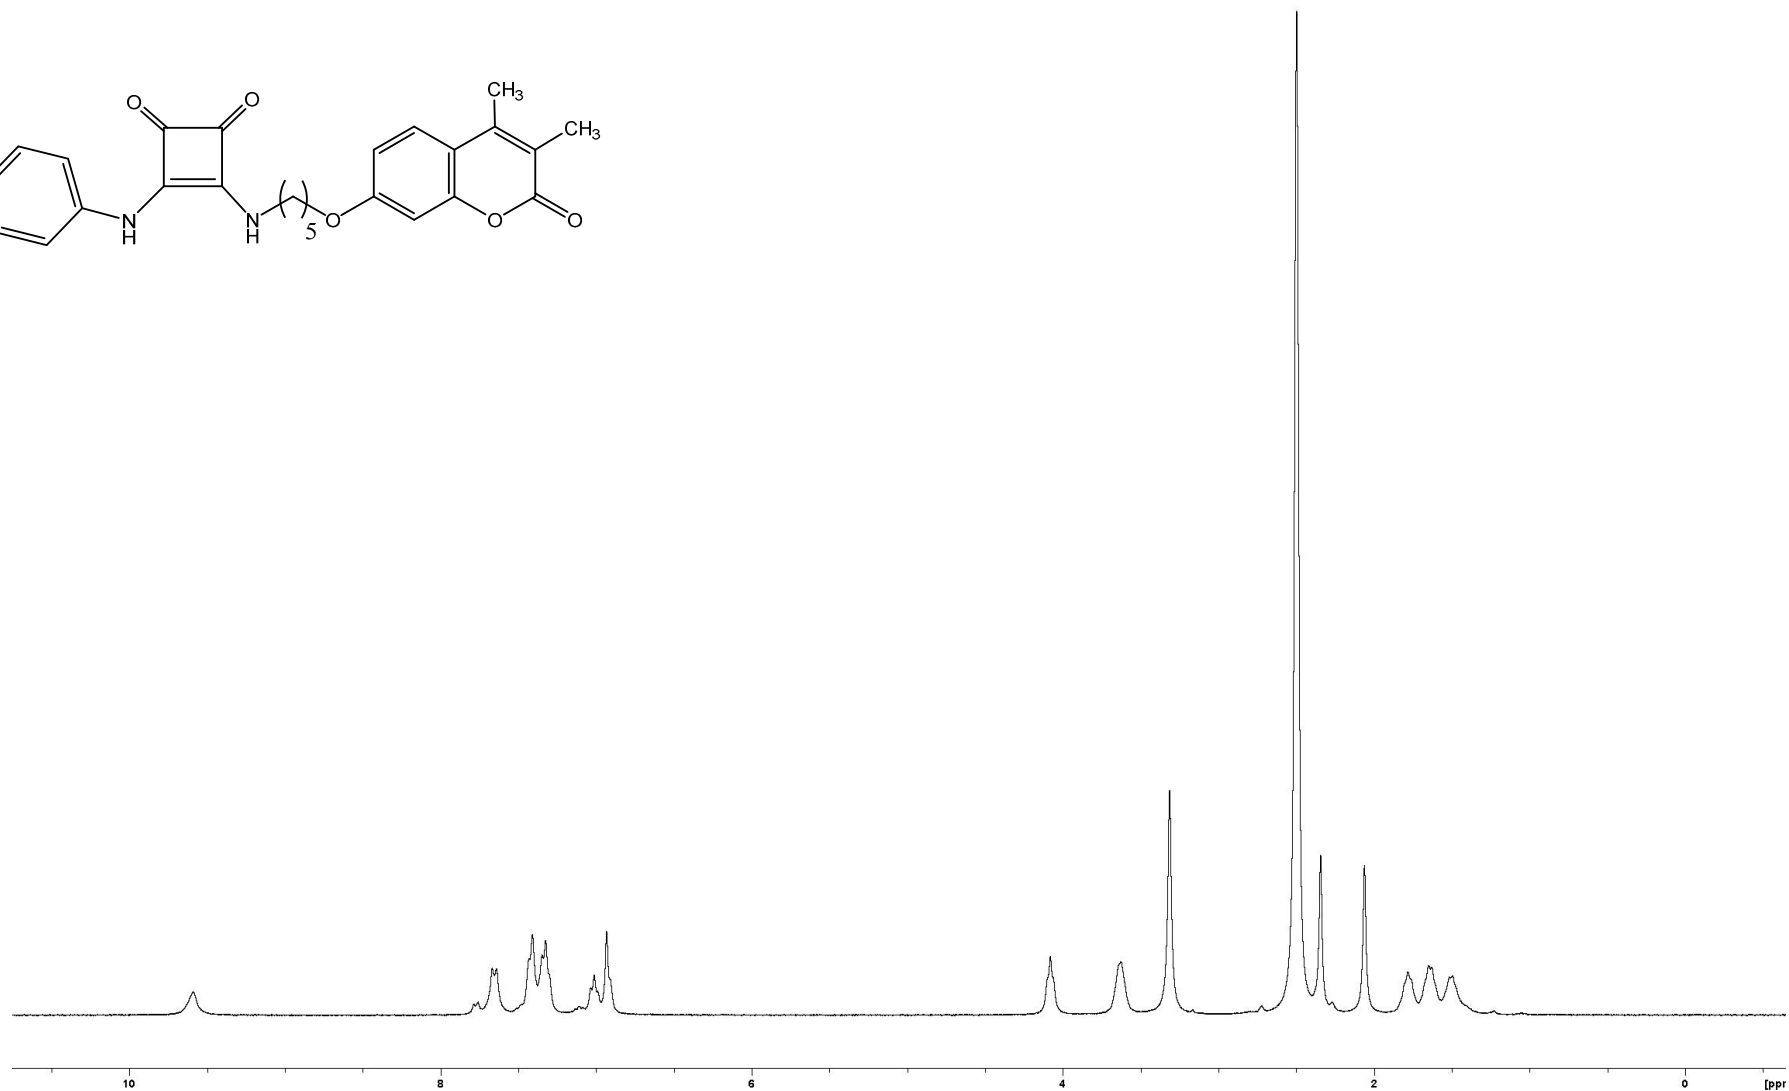

$^1\text{H-NMR}$  (125.7 MHz,  $(\text{CD}_3)_2\text{SO}$ ) of **16j**



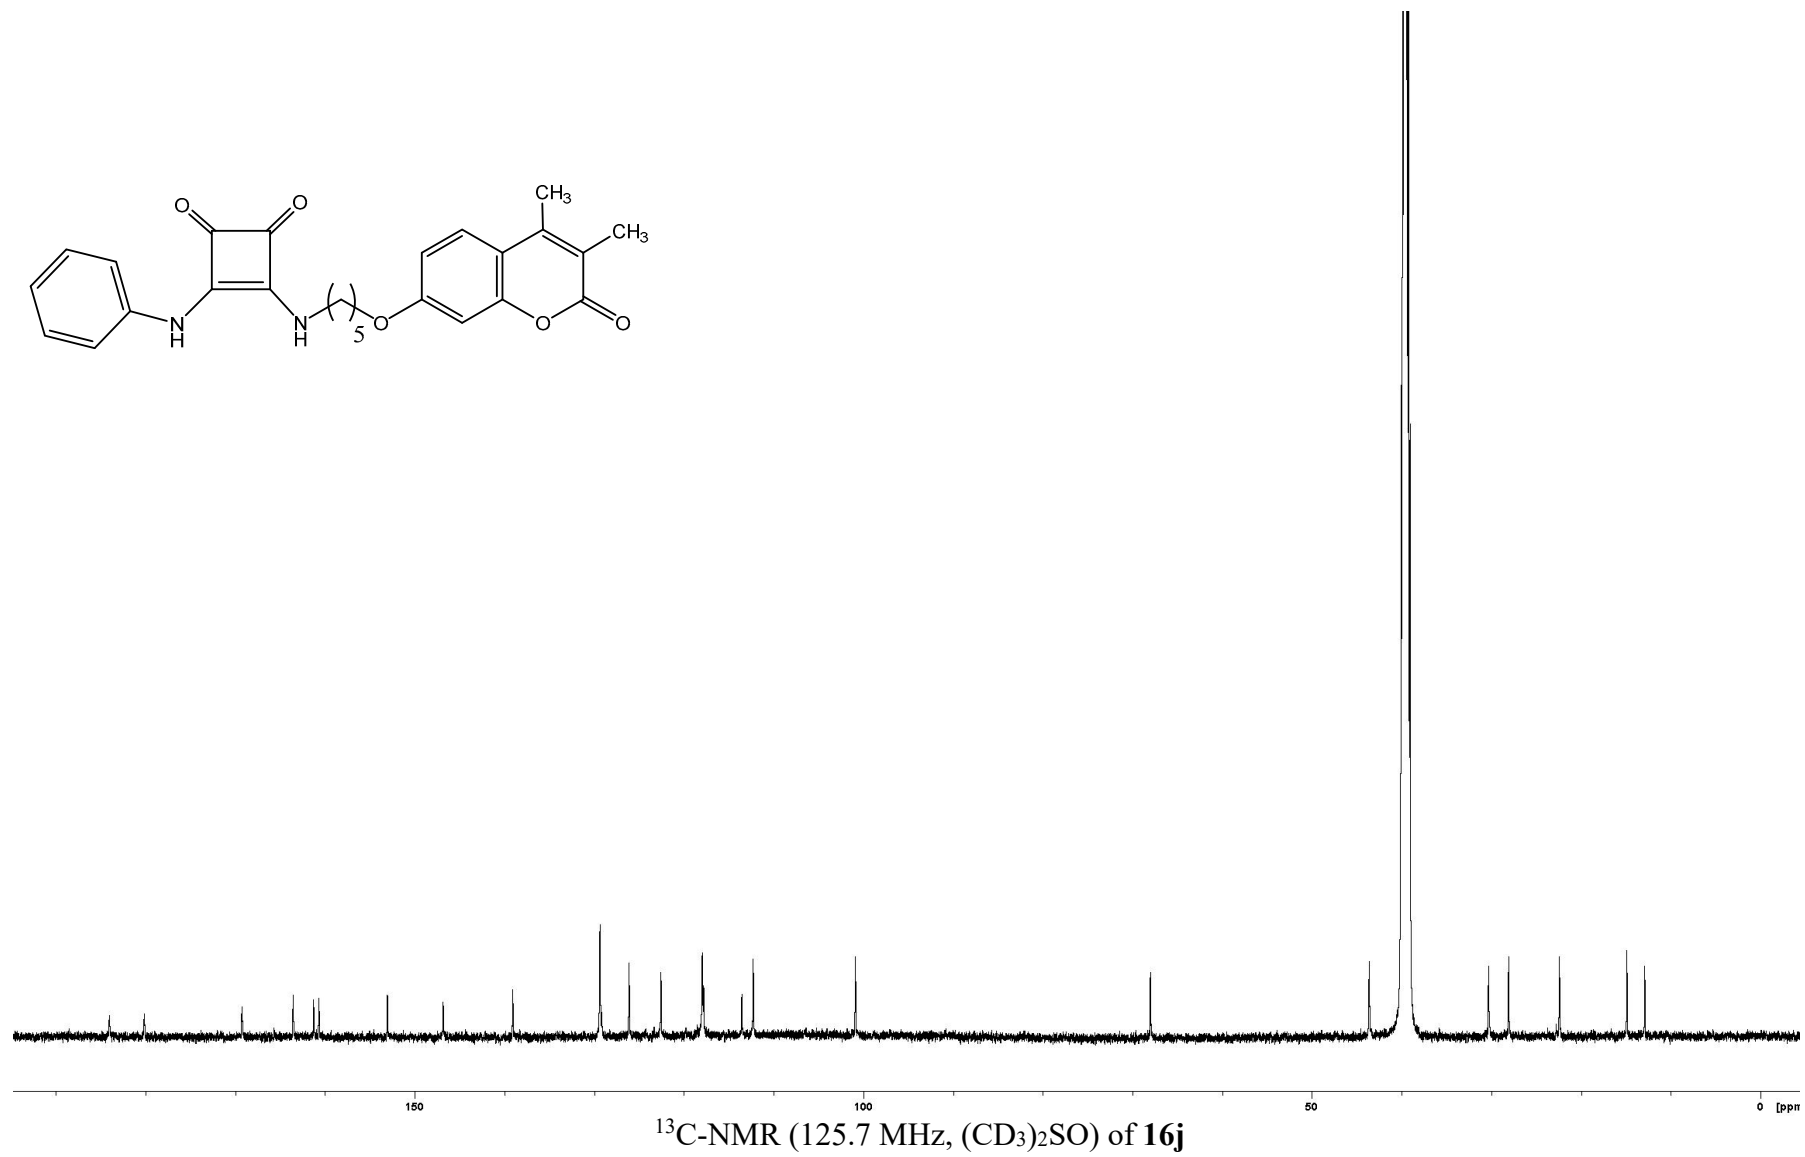

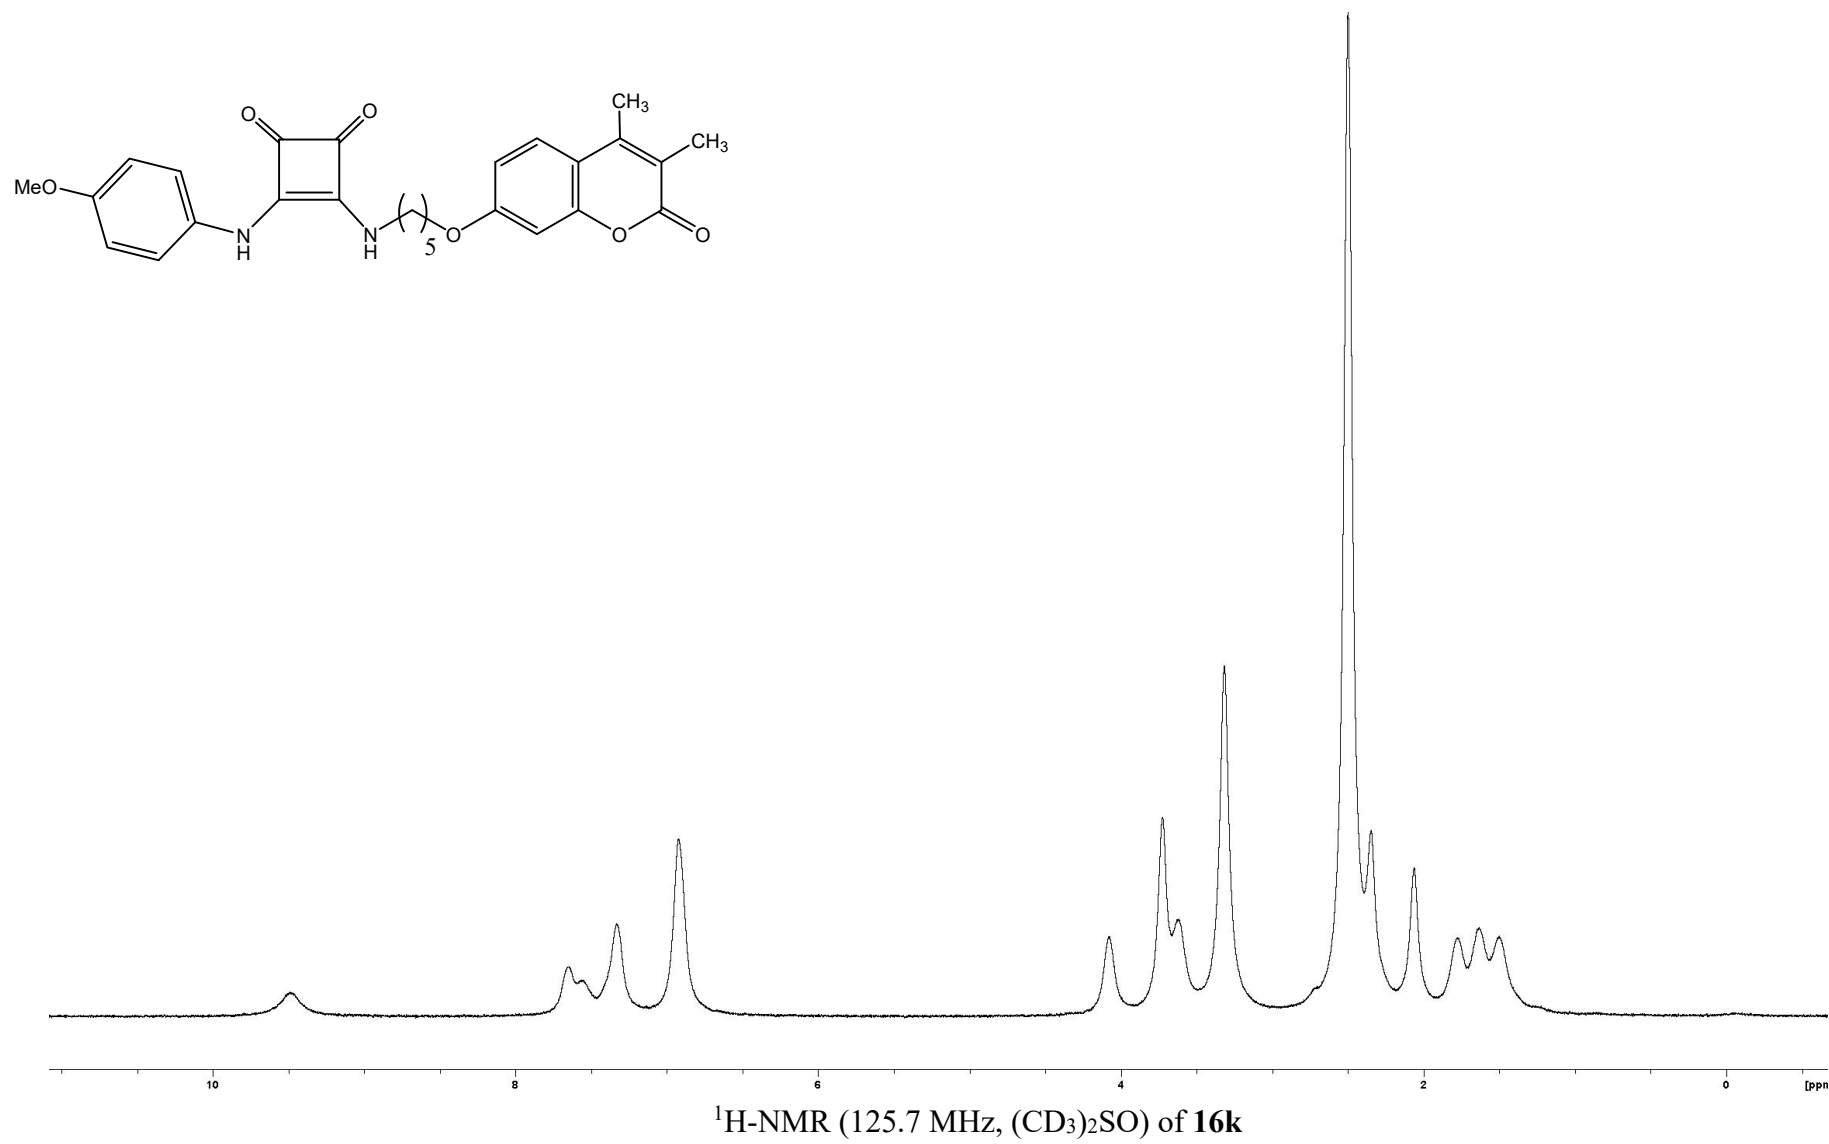

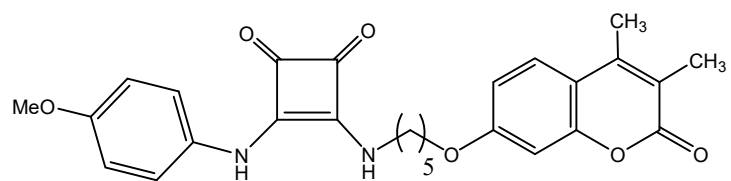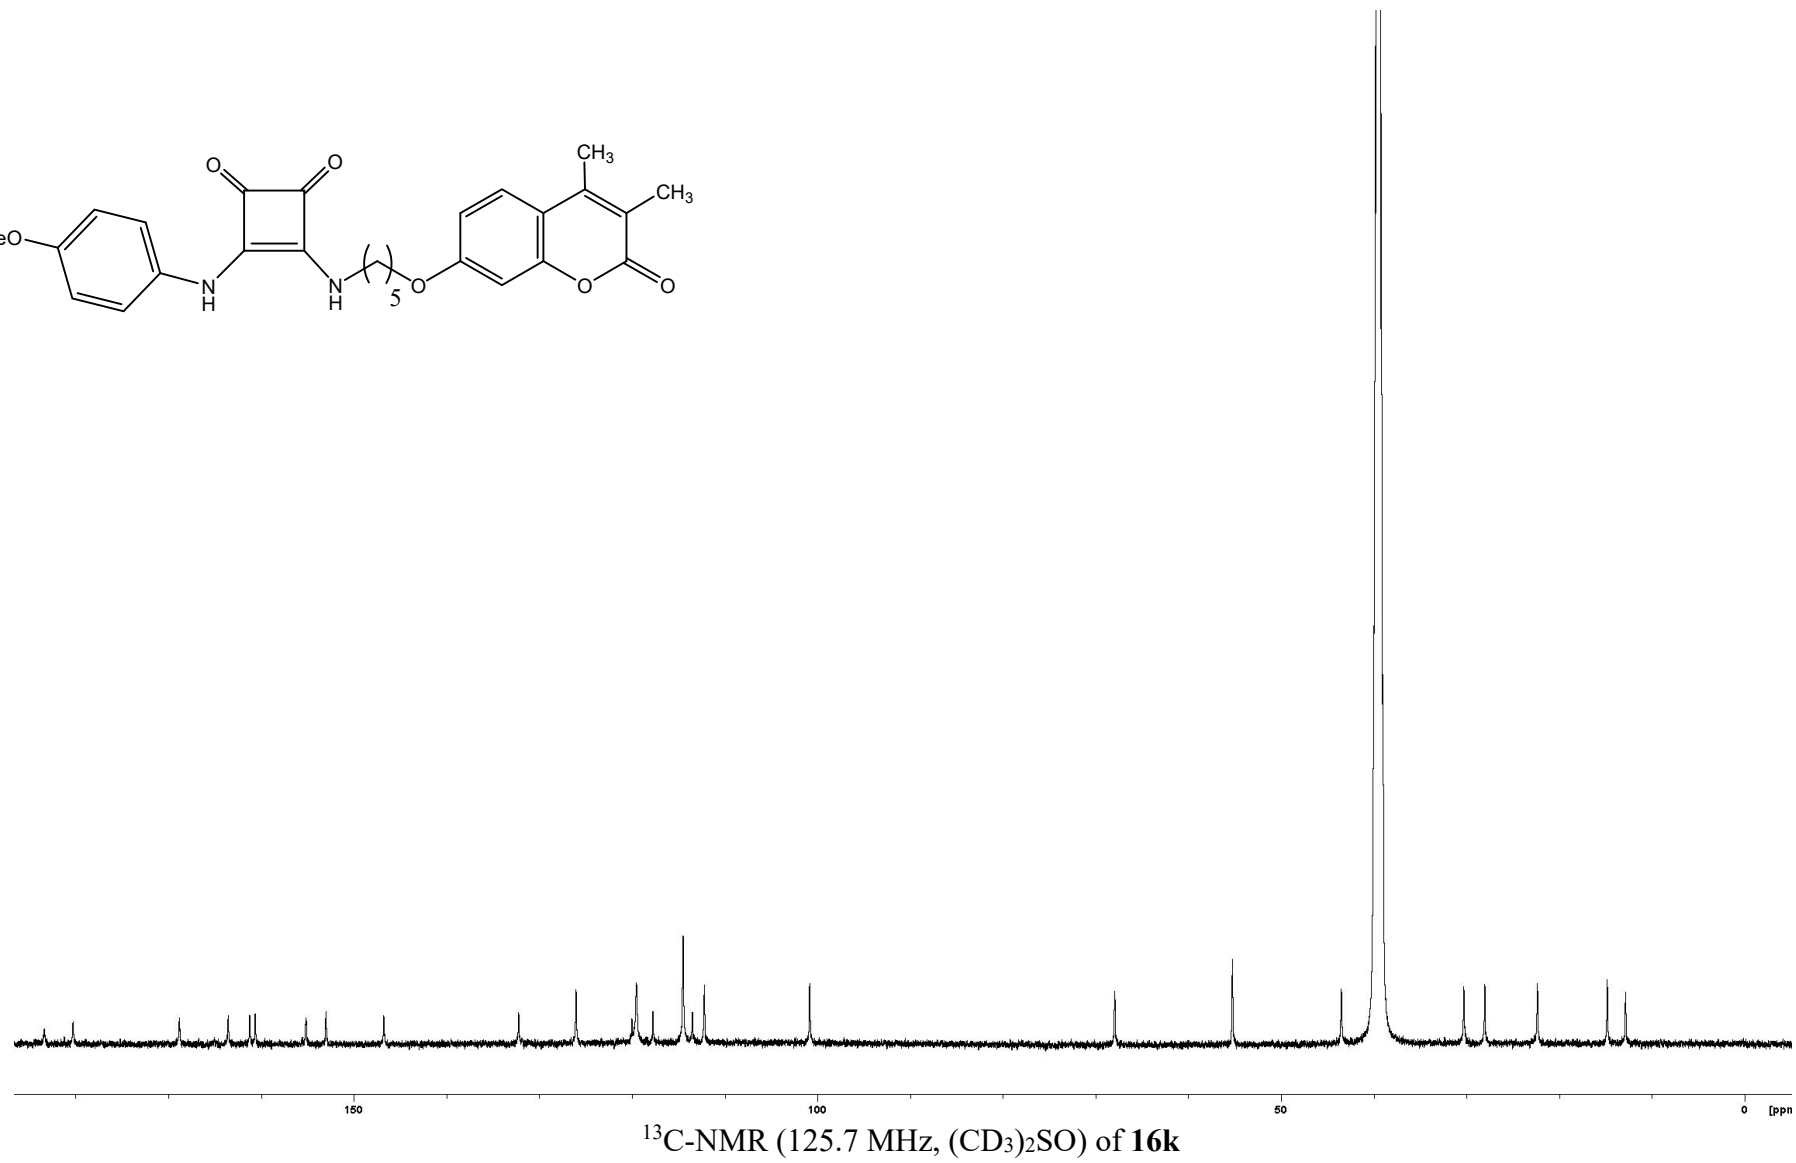

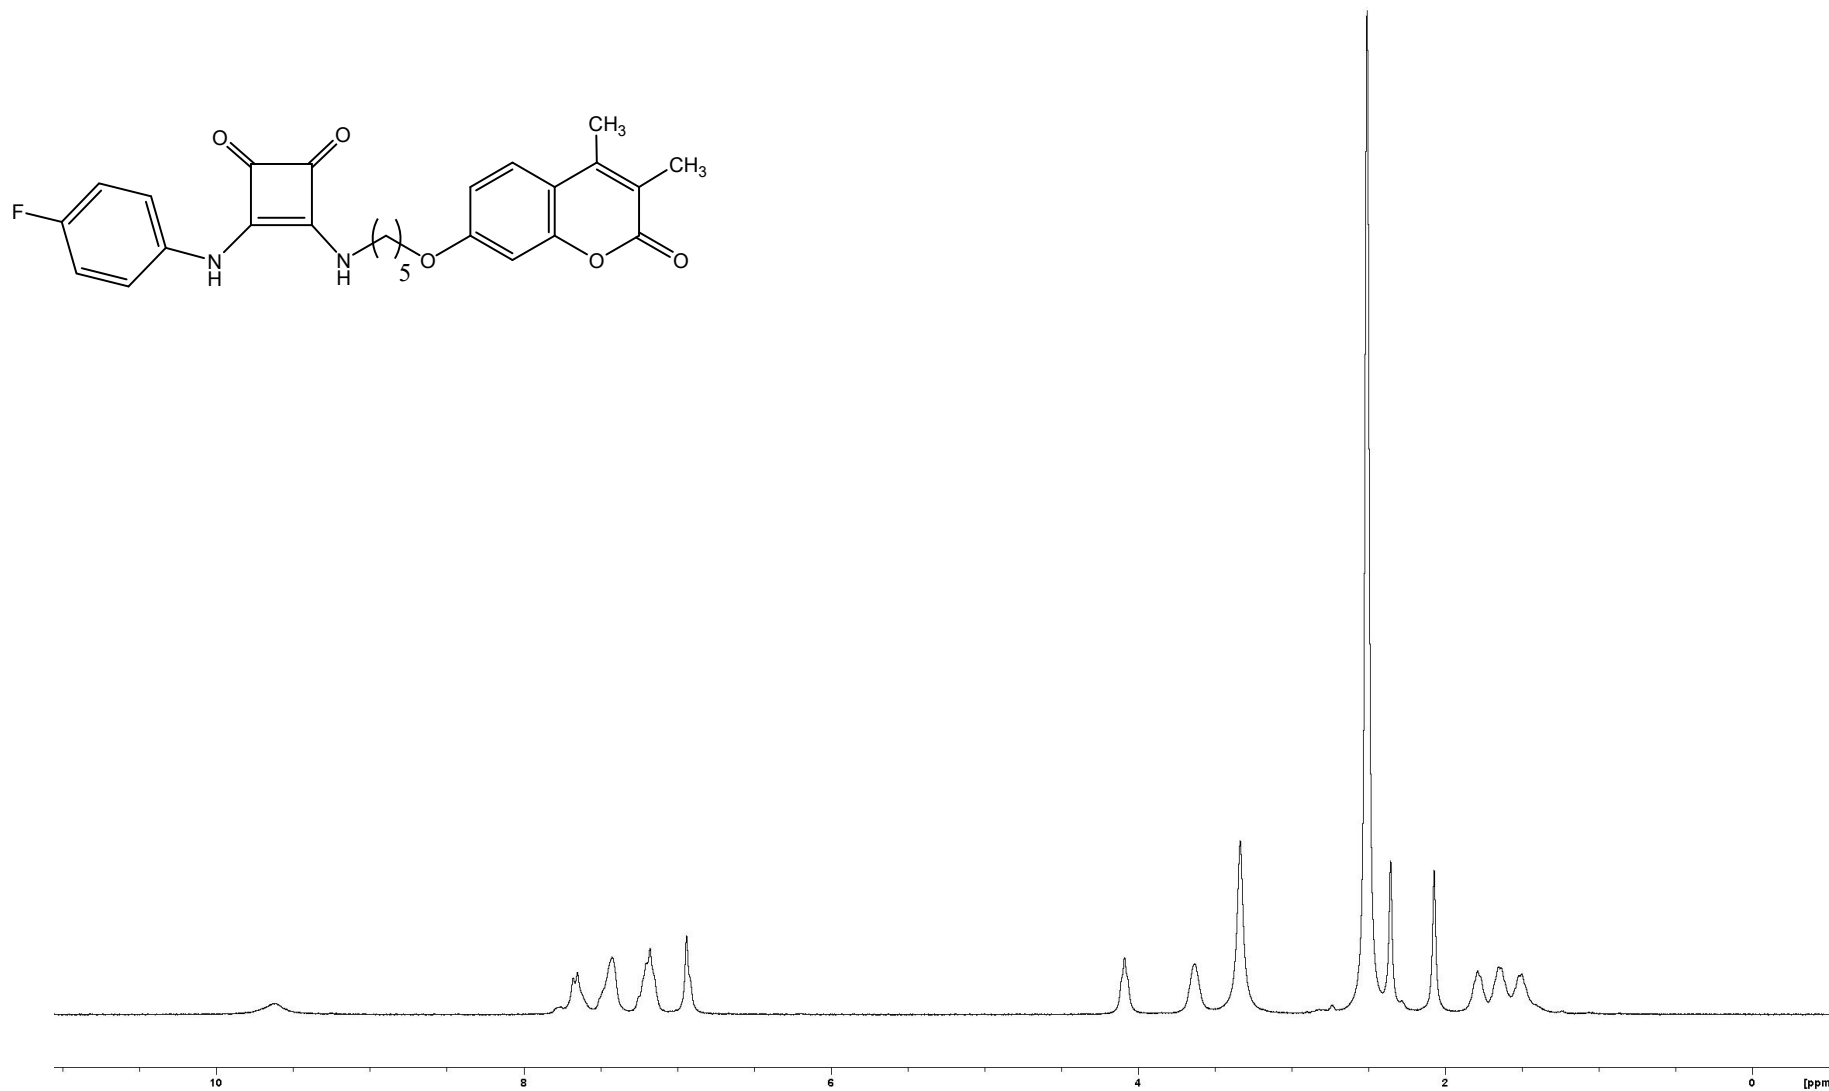

$^1\text{H-NMR}$  (125.7 MHz,  $(\text{CD}_3)_2\text{SO}$ ) of **16l**

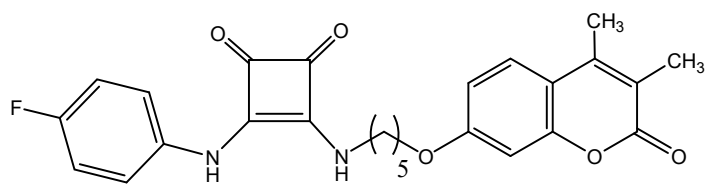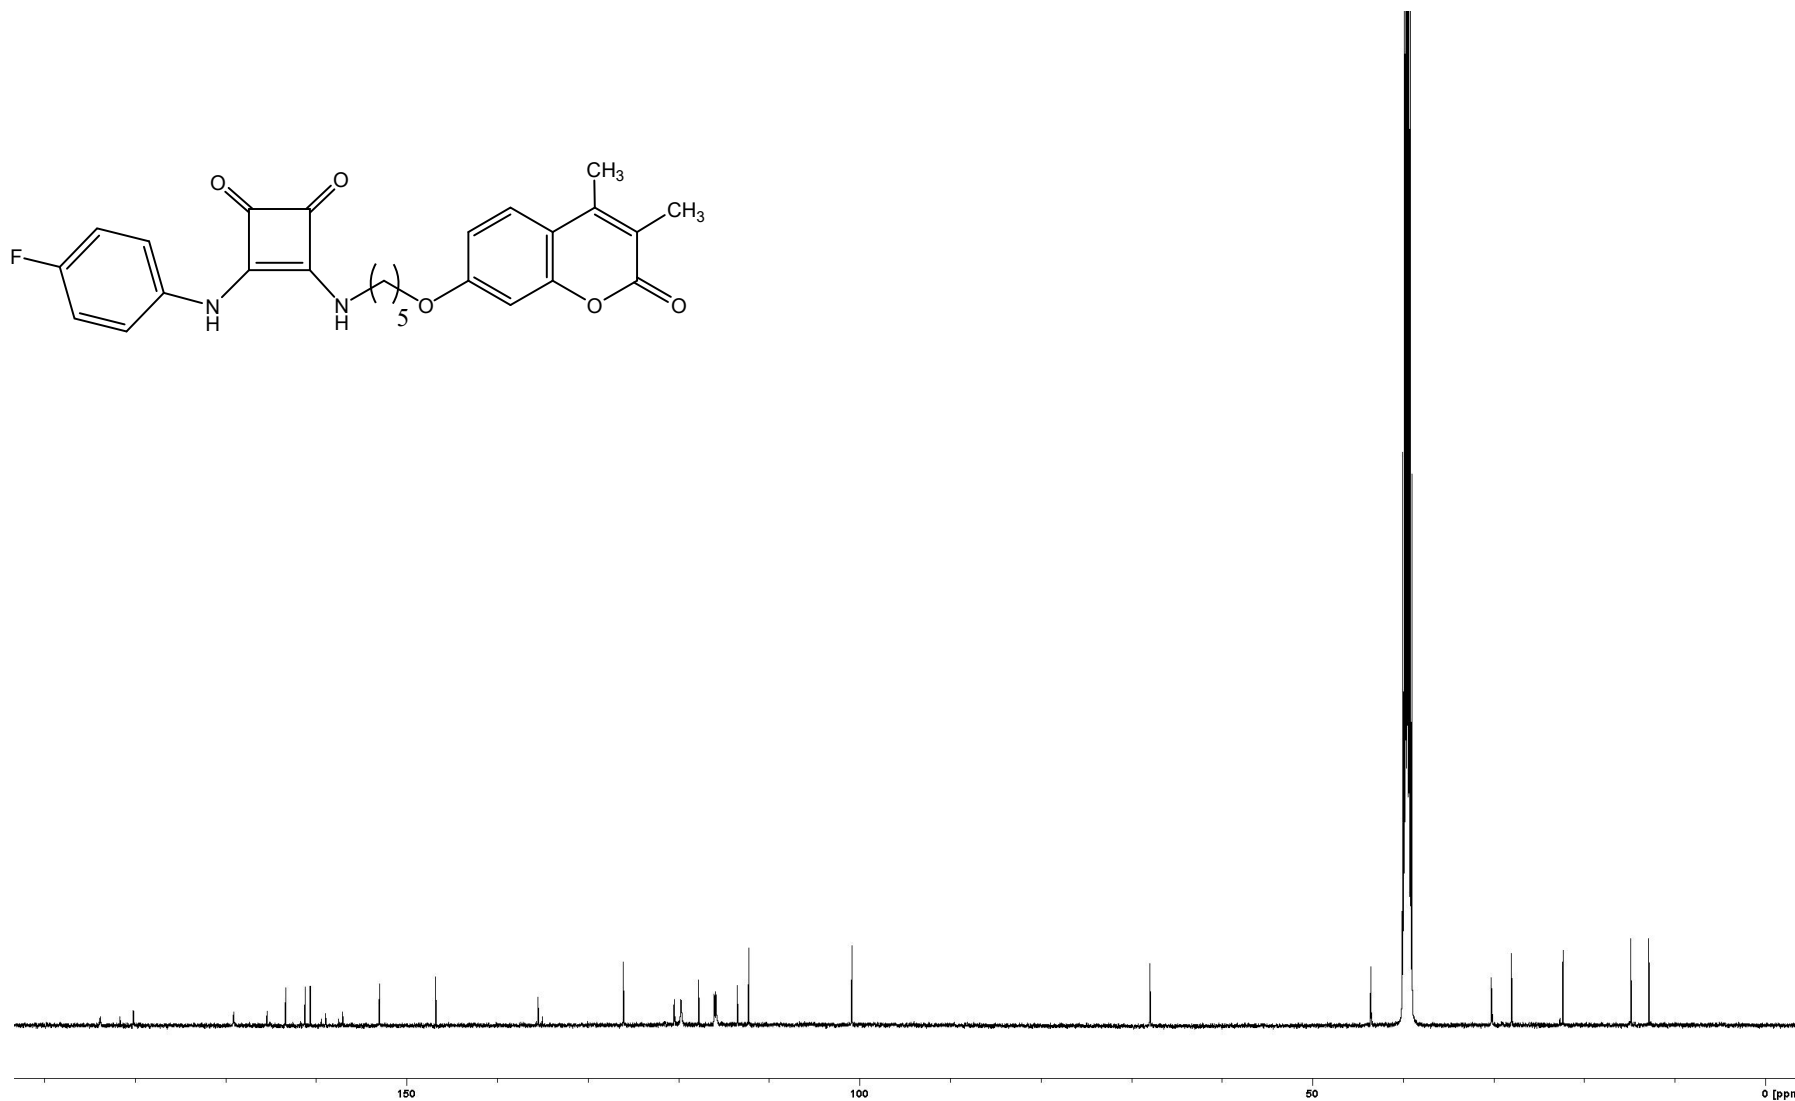

$^{13}\text{C}$ -NMR (125.7 MHz,  $(\text{CD}_3)_2\text{SO}$ ) of **16l**

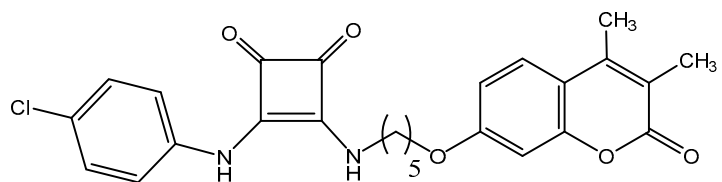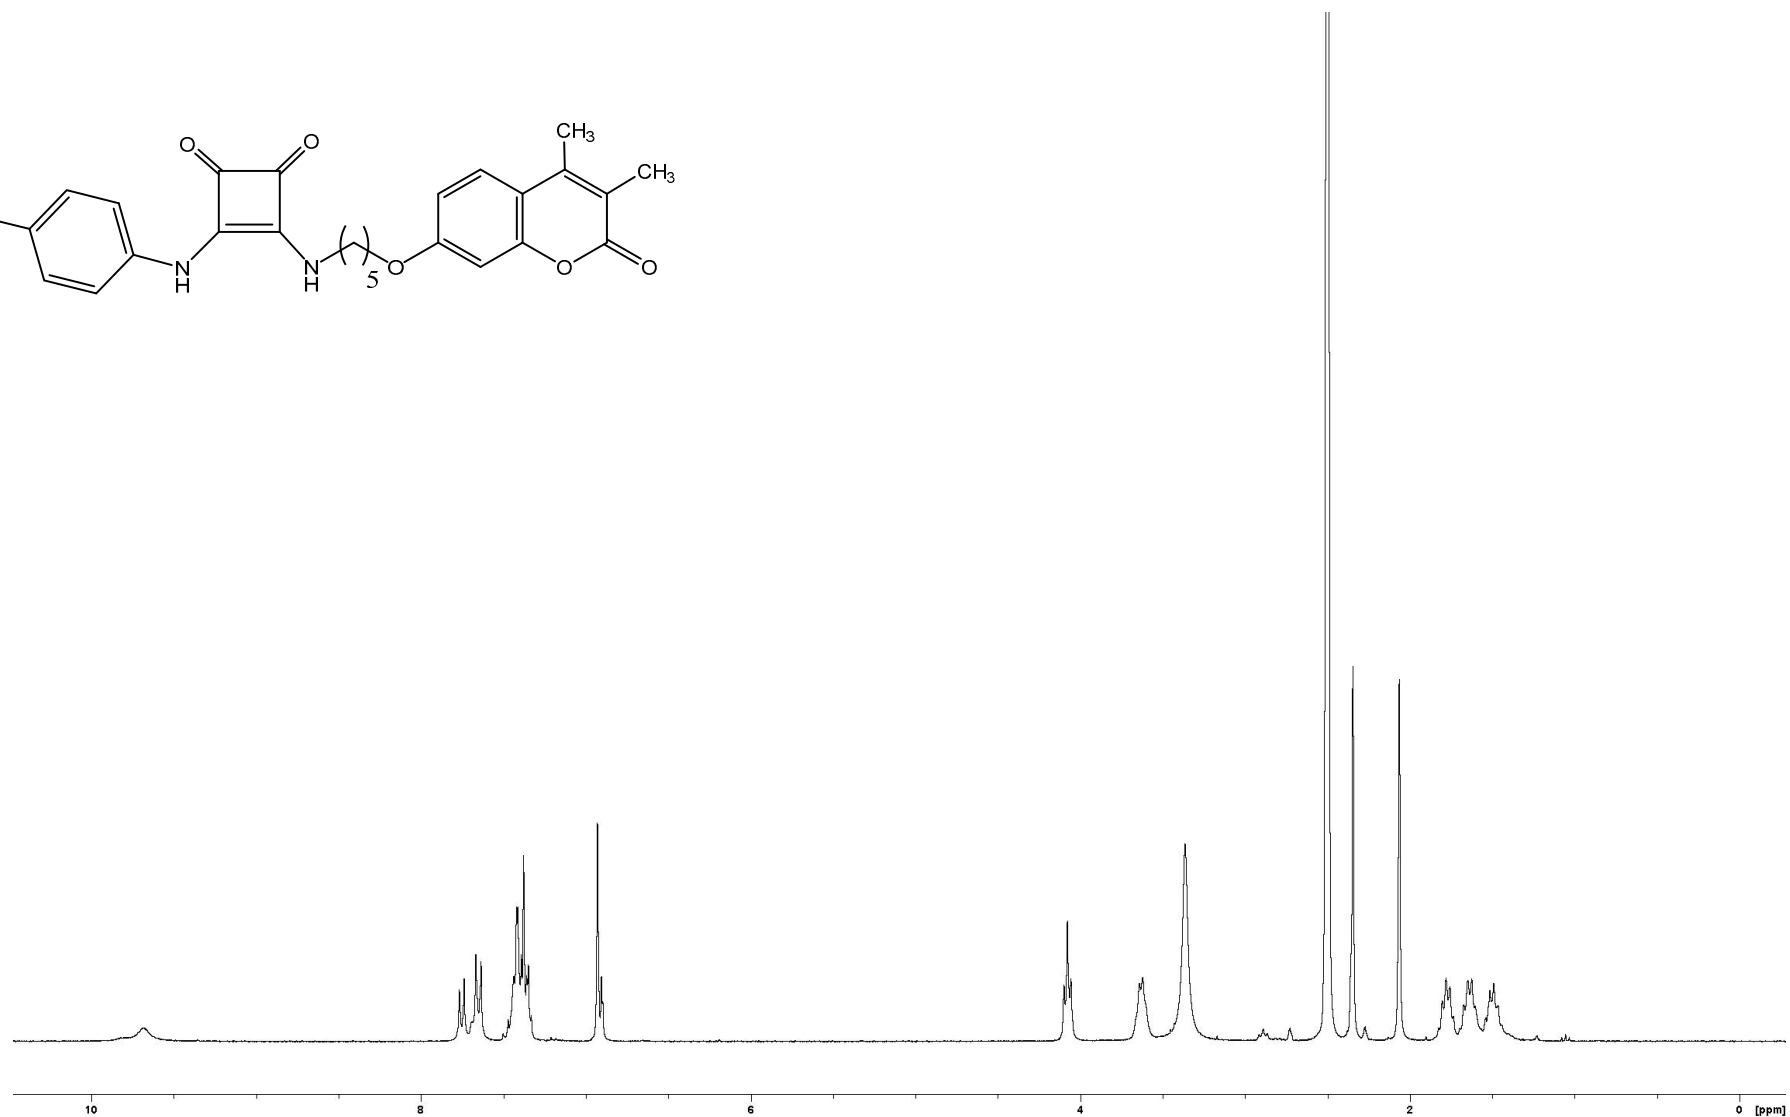

$^1\text{H}$ -NMR (125.7 MHz,  $(\text{CD}_3)_2\text{SO}$ ) of **16m**

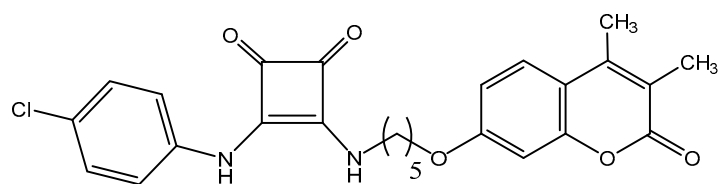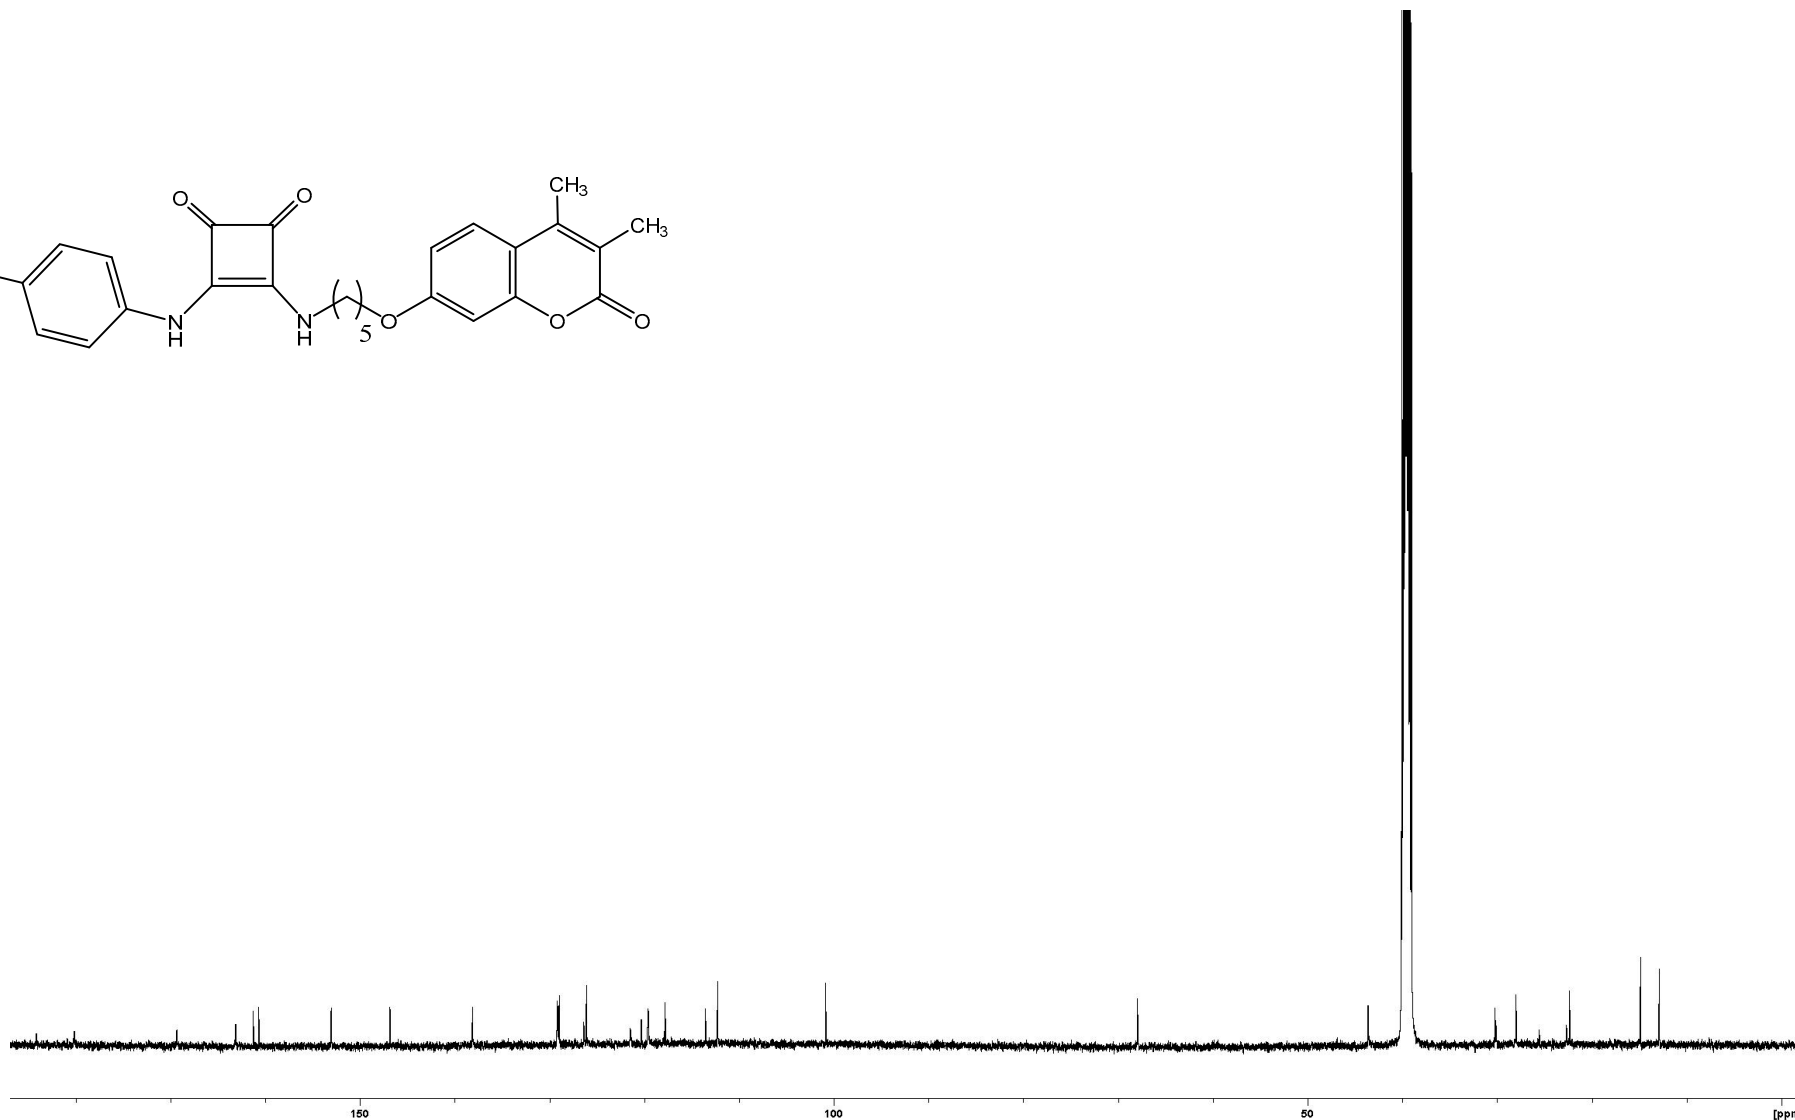

$^{13}\text{C}$ -NMR (125.7 MHz,  $(\text{CD}_3)_2\text{SO}$ ) of **16m**

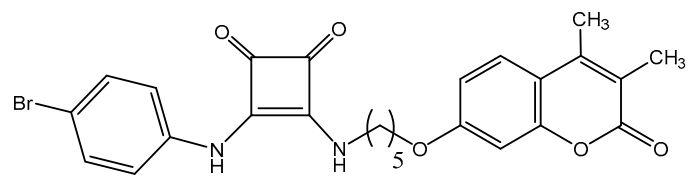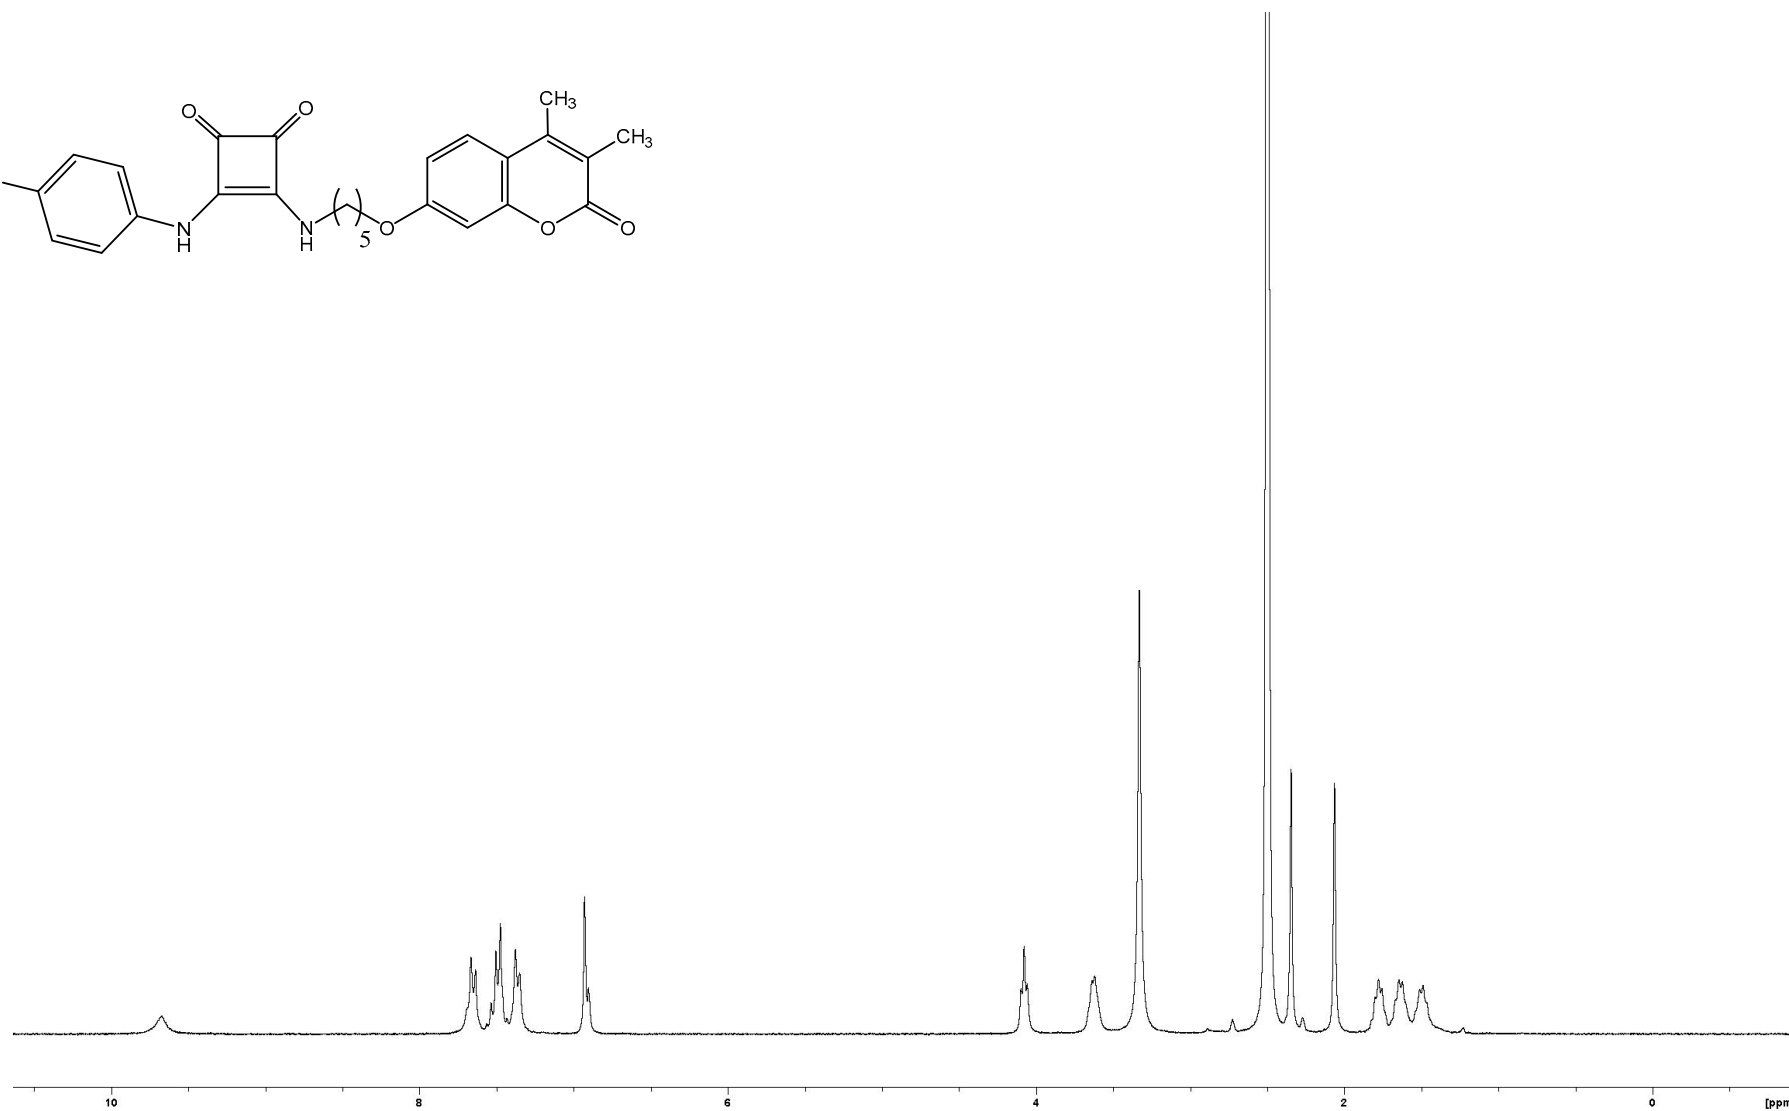

$^1\text{H}$ -NMR (125.7 MHz,  $(\text{CD}_3)_2\text{SO}$ ) of **16n**



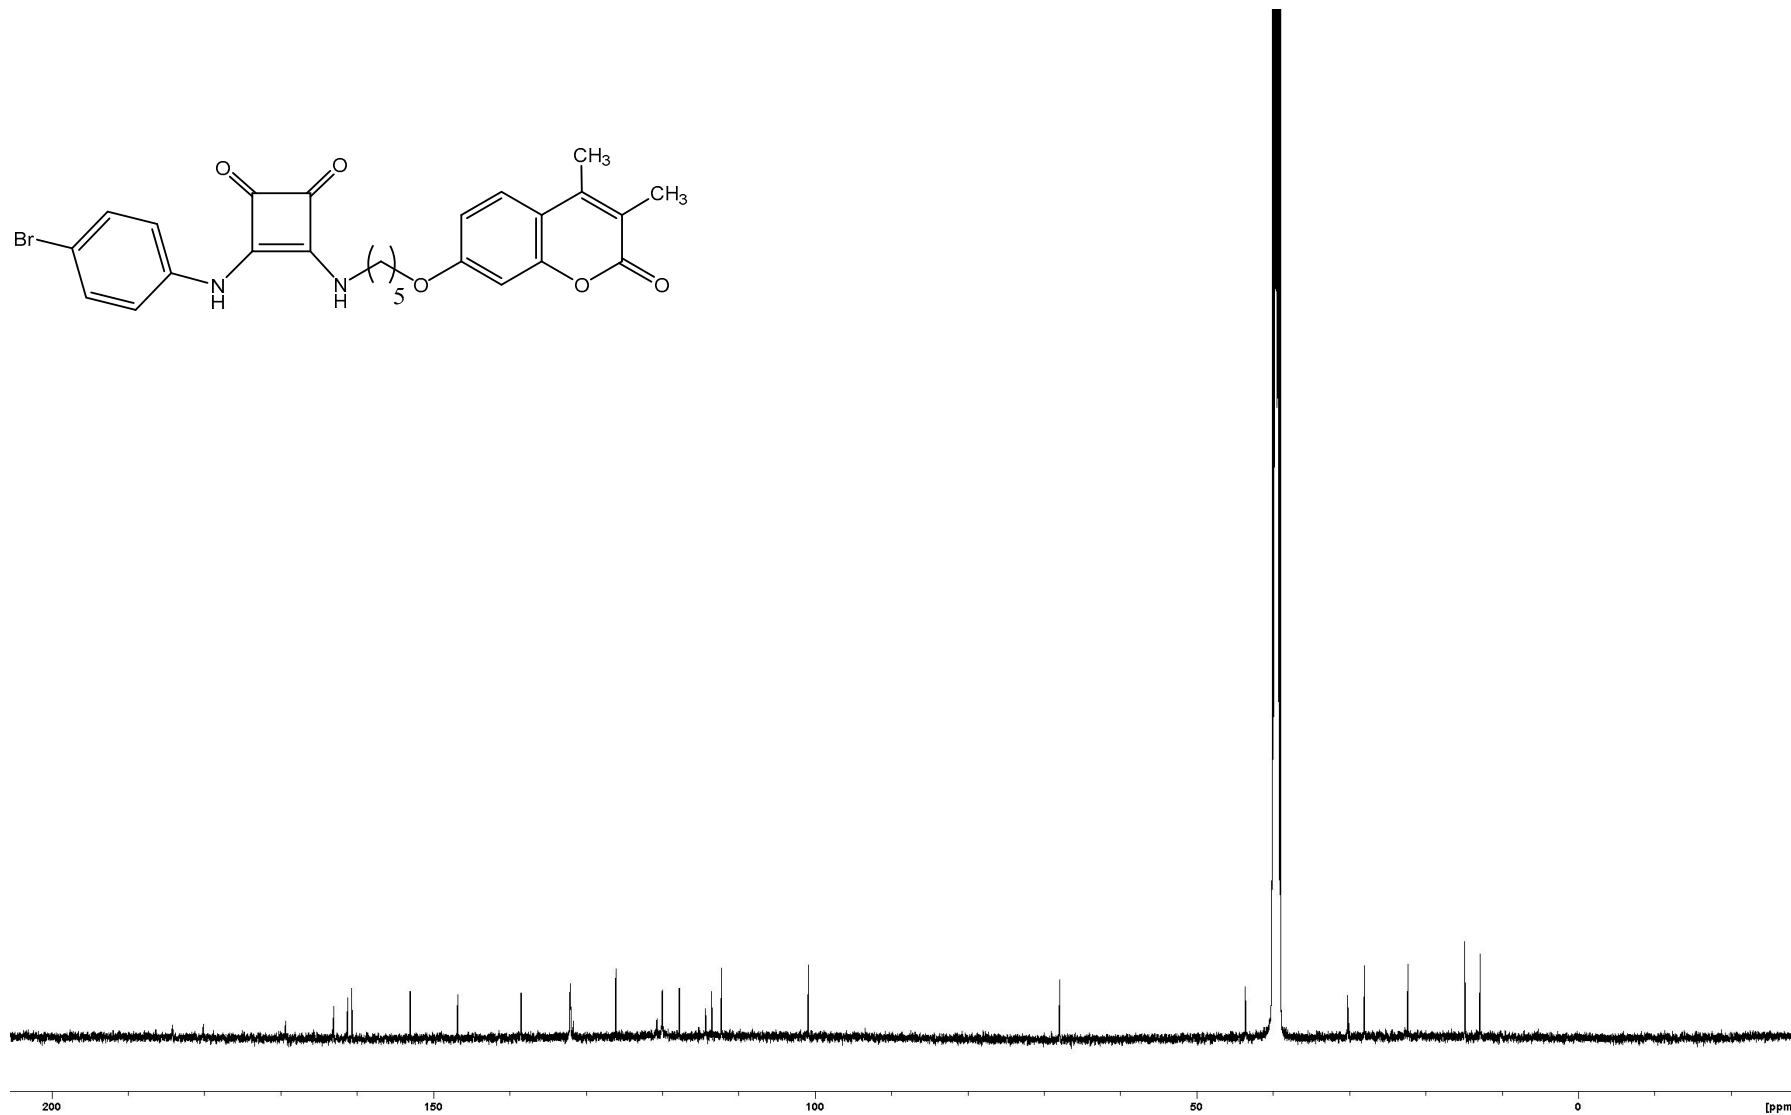

$^{13}\text{C}$ -NMR (125.7 MHz,  $(\text{CD}_3)_2\text{SO}$ ) of **16n**

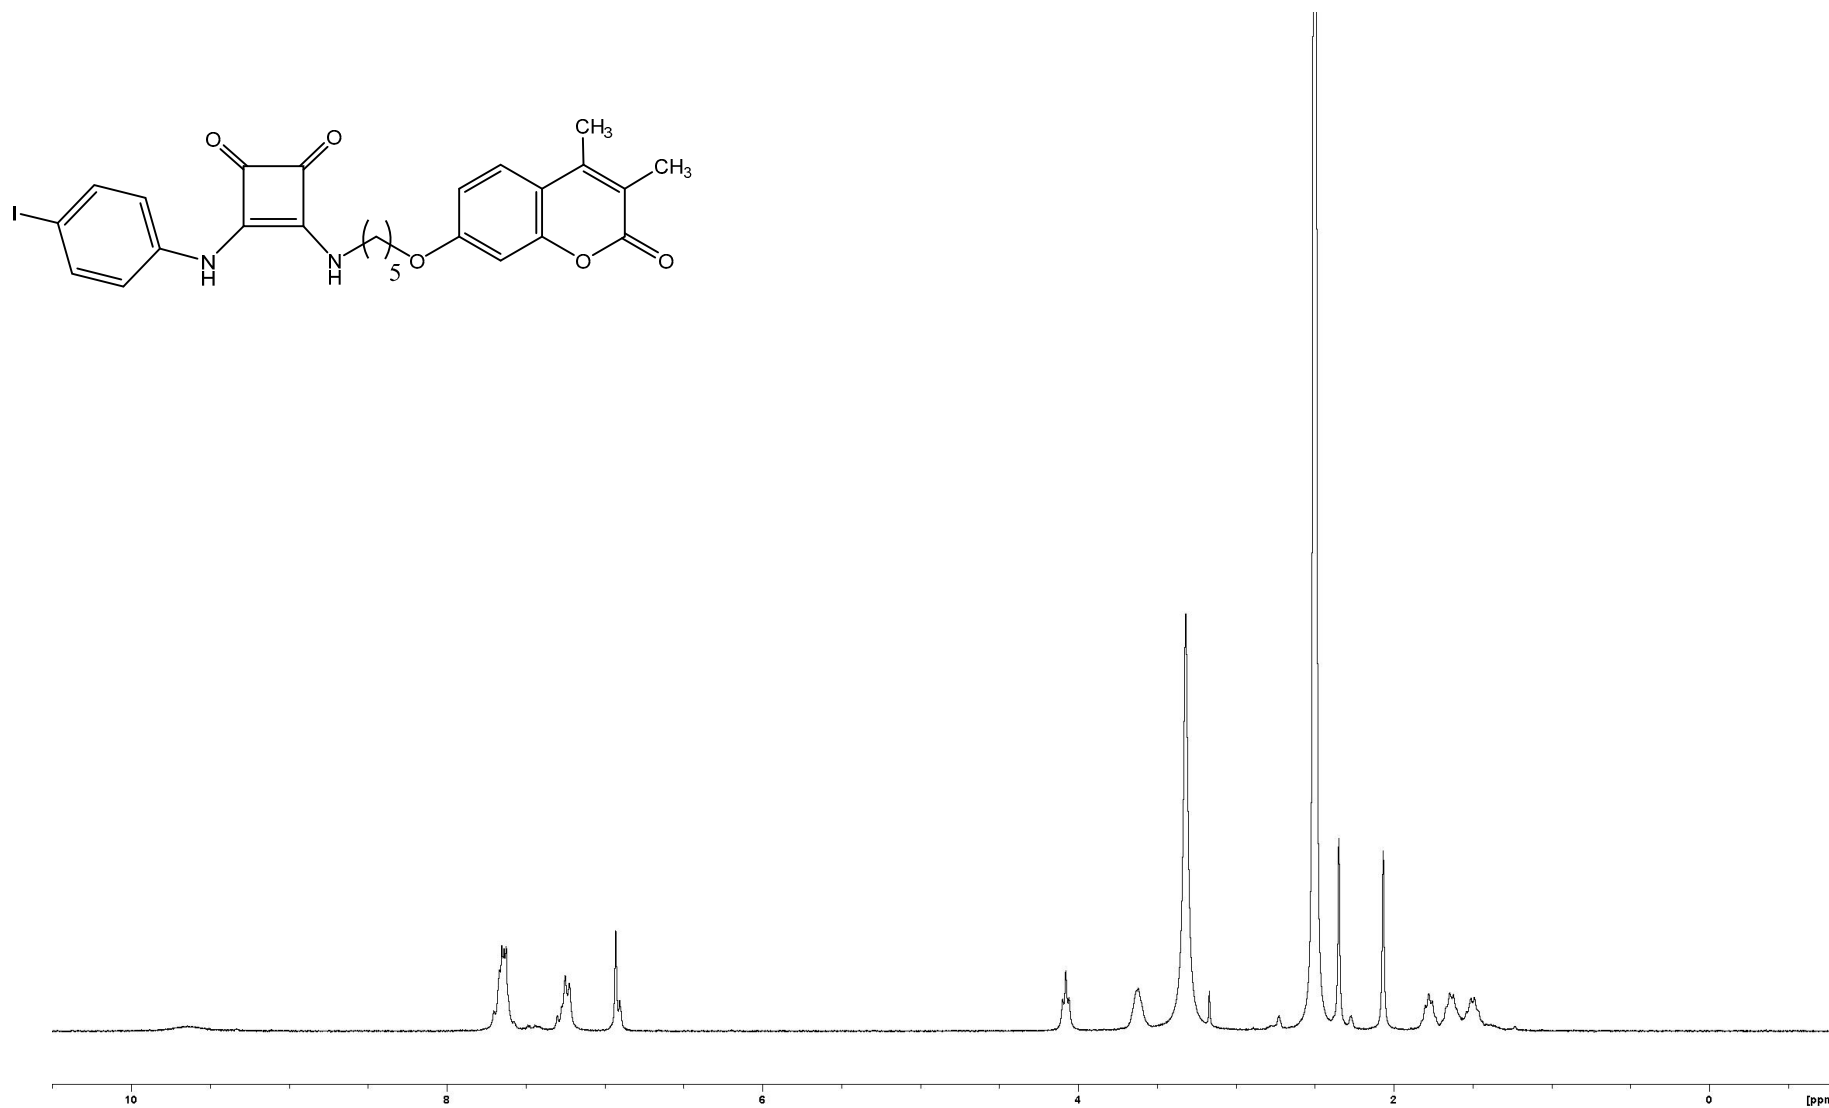

$^1\text{H-NMR}$  (125.7 MHz,  $(\text{CD}_3)_2\text{SO}$ ) of **16o**

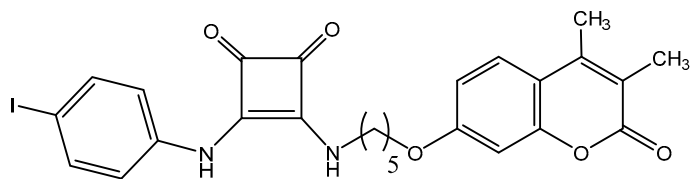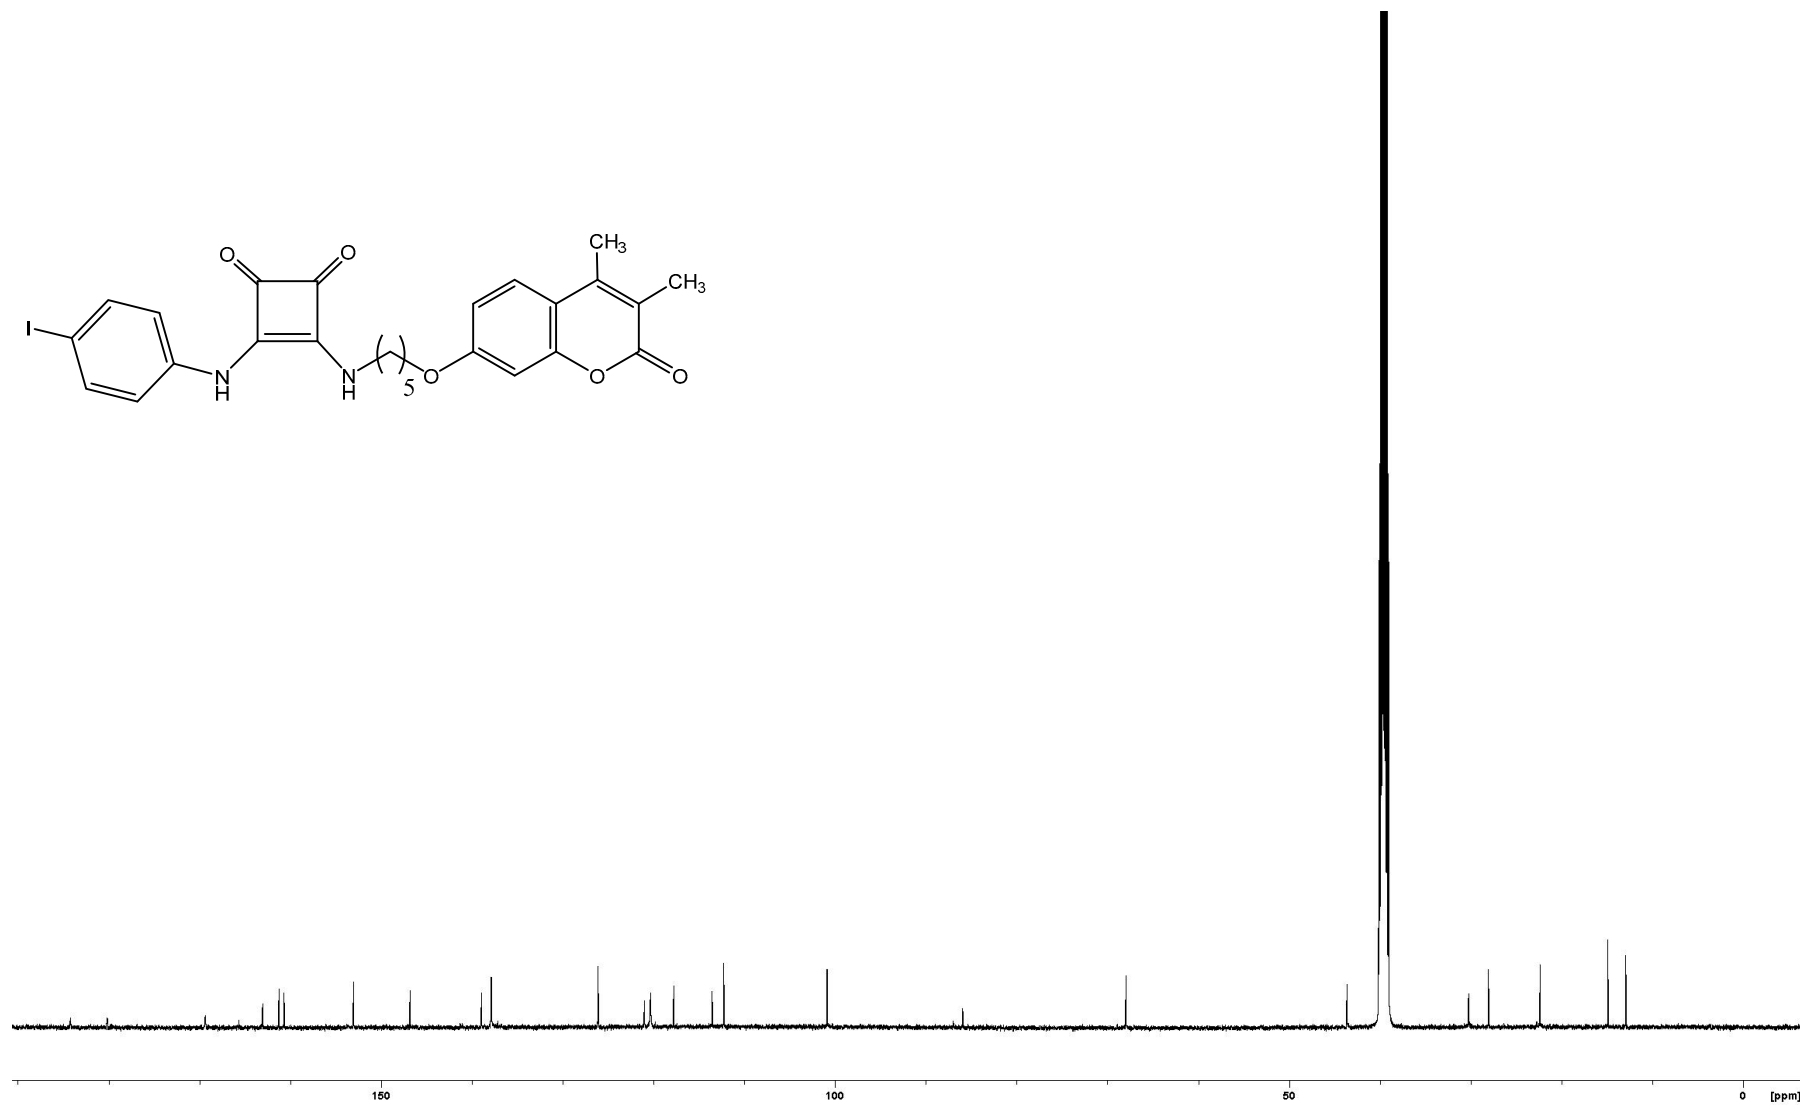

$^{13}\text{C}$ -NMR (125.7 MHz,  $(\text{CD}_3)_2\text{SO}$ ) of **160**

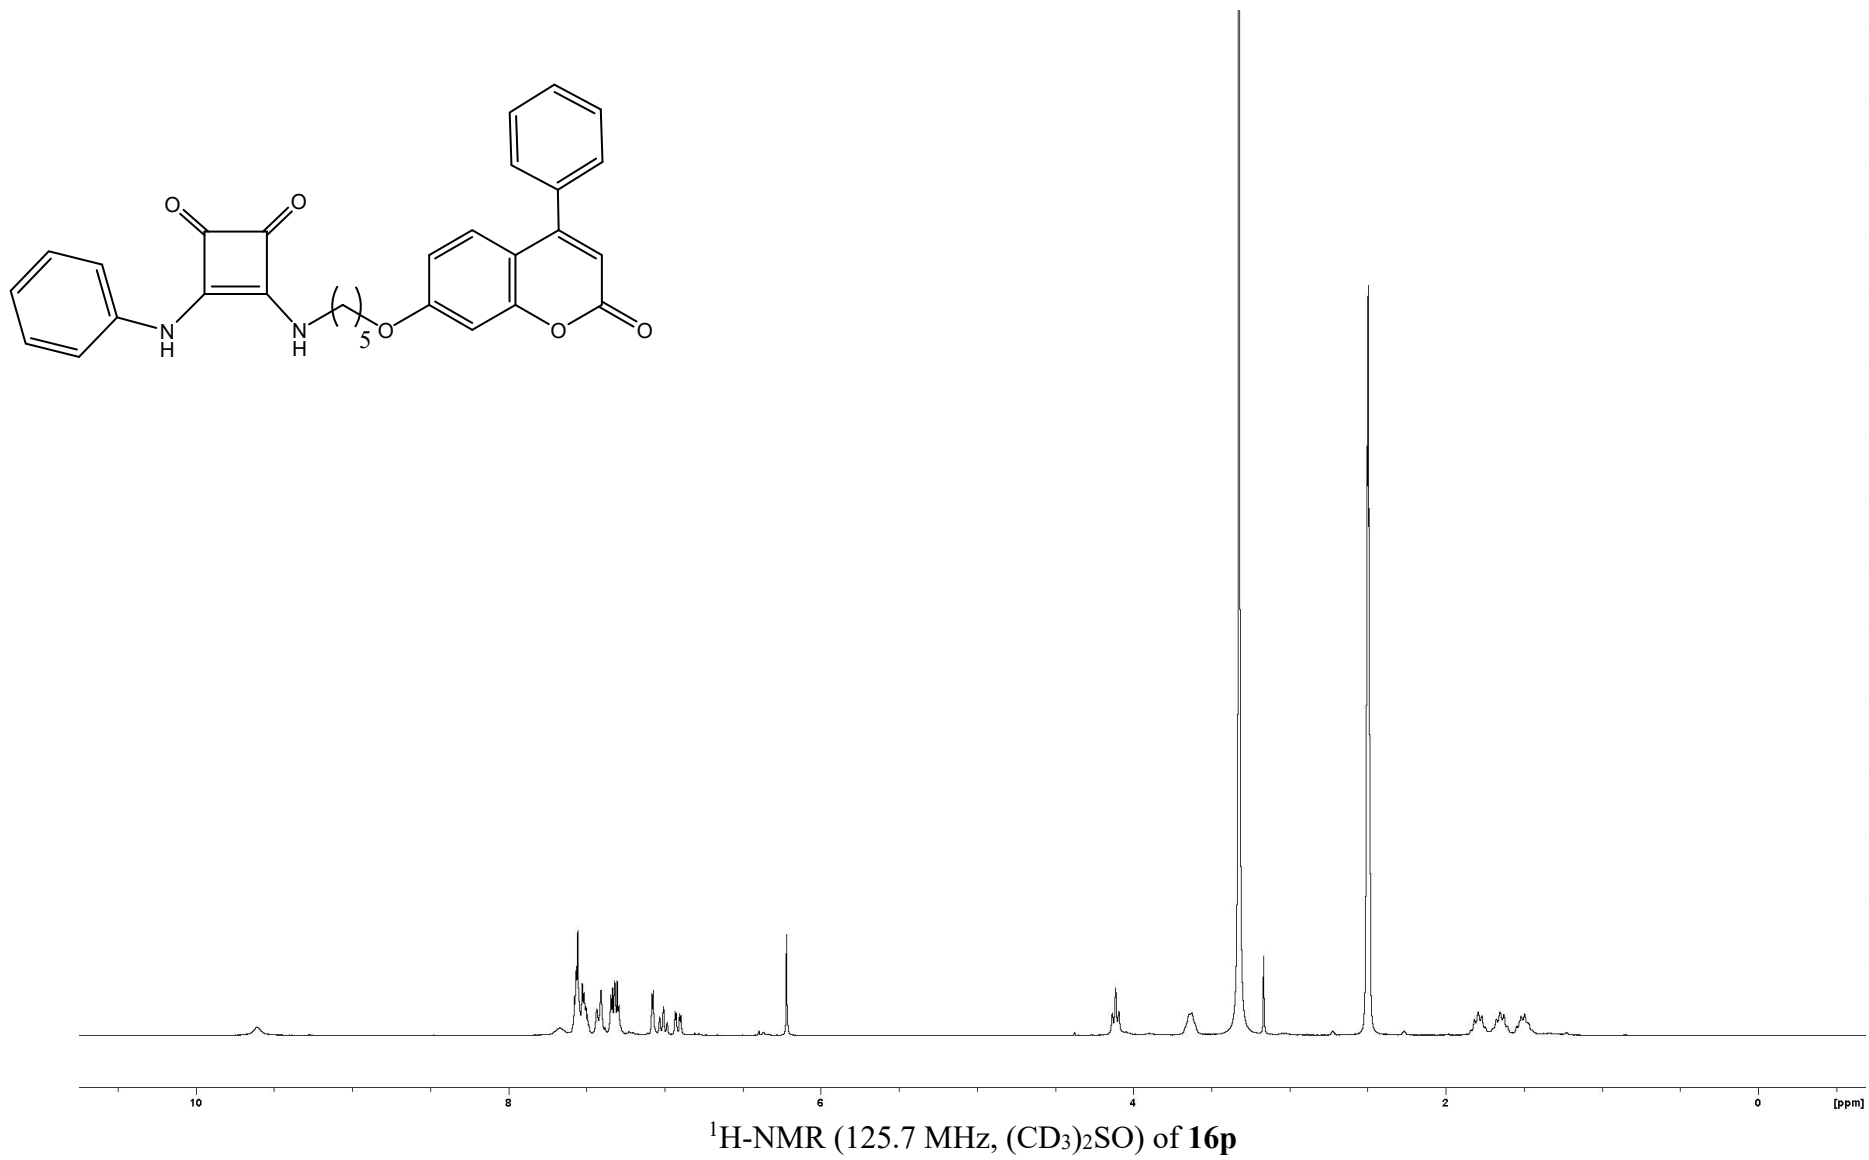

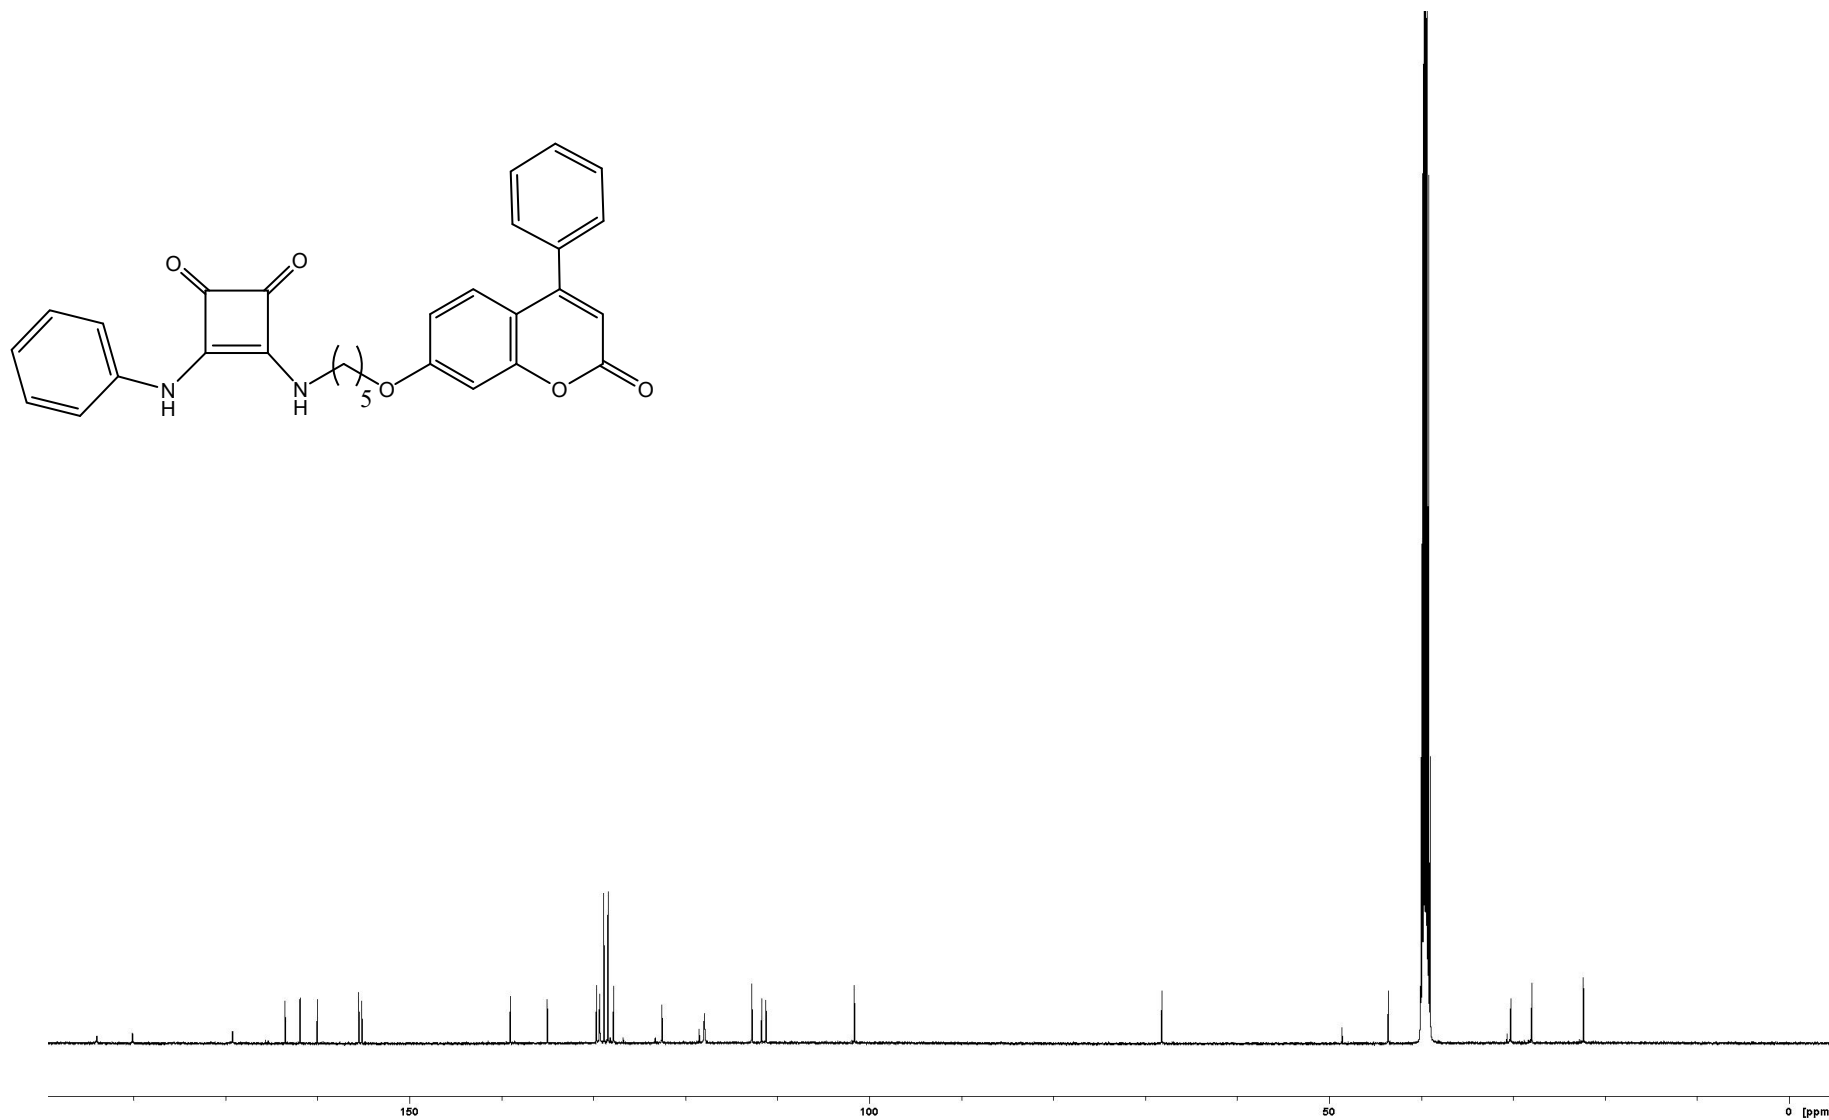

$^{13}\text{C}$ -NMR (125.7 MHz,  $(\text{CD}_3)_2\text{SO}$ ) of **16p**
